# Supplementary material for: Synthesis and Biological Evaluation of Sclareolide-Indole Conjugates and Their Derivatives
Source: MDPI journal article supplement (doi:10.3390/molecules28041737), 2023-02-11
Supplement: s1 [file s1]

Supporting information for the article entitled:

Synthesis and Biological Evaluation of Sclareolide-Indole  
Conjugates and Their Derivatives

## Table of Content

|                                                                                                      |     |
|------------------------------------------------------------------------------------------------------|-----|
| Table S1: Limitation of substrates of the coupling reaction <sup>a</sup> .....                       | S3  |
| Table S2: The X-ray data of compounds 3 .....                                                        | S4  |
| Table S3: X-ray structure of compound 8ab.....                                                       | S5  |
| Figure S1: Cell cycle distribution figures of Decitabine .....                                       | S6  |
| Figure S2: Cell cycle distribution figures of 10 .....                                               | S6  |
| Figure S3: Cell apoptosis figures of Decitabine.....                                                 | S7  |
| Figure S4: Cell apoptosis figures of 10 .....                                                        | S7  |
| 1. General chemistry methods .....                                                                   | S8  |
| 2. Procedures for synthesis of Sclareolide derivatives .....                                         | S8  |
| 3. <sup>1</sup> H NMR and <sup>13</sup> C NMR spectrum of intermediates and final<br>compounds ..... | S31 |
| 4. Original HRMS spectra of final compounds .....                                                    | S71 |
| 5. UPLC purity reports of final compounds .....                                                      | S92 |

Table S1: Limitation of substrates of the coupling reaction<sup>a</sup>

| Entry | Substitution Position                                                               | Yield       | Entry | Substitution Position                                                                | Yield       |
|-------|-------------------------------------------------------------------------------------|-------------|-------|--------------------------------------------------------------------------------------|-------------|
| 1     |    | No reaction | 11    |    | No reaction |
| 2     |    | No reaction | 12    |    | No reaction |
| 3     |    | No reaction | 13    |    | No reaction |
| 4     |    | No reaction | 14    |    | No reaction |
| 5     |    | No reaction | 15    |    | No reaction |
| 6     |    | No reaction | 16    |    | No reaction |
| 7     |    | No reaction | 17    |   | No reaction |
| 8     |  | No reaction | 18    |  | No reaction |
| 9     |  | No reaction | 19    |  | No reaction |
| 10    |  | No reaction | 20    |  | No reaction |

<sup>a</sup> Compounds that have been tried but had no formation of expected product in the standard condition.

**Table S2: The X-ray data of compounds 3**

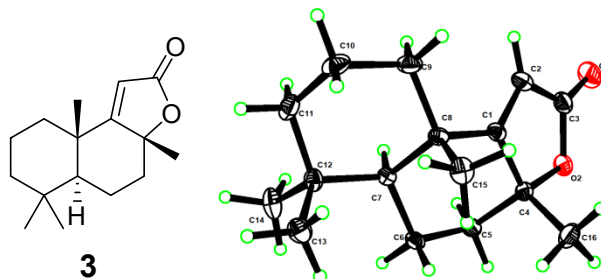

CCDC Deposition Number: 2238307.

**Datablock: cu\_2022563\_0m**

|                                                               |                |                    |             |
|---------------------------------------------------------------|----------------|--------------------|-------------|
| Bond precision:                                               | C-C = 0.0028 Å | Wavelength=1.54178 |             |
| Cell:                                                         | a=7.3391(2)    | b=10.7059(3)       | c=9.5244(3) |
|                                                               | alpha=90       | beta=111.776(2)    | gamma=90    |
| Temperature:                                                  | 170 K          |                    |             |
|                                                               | Calculated     | Reported           |             |
| Volume                                                        | 694.95(4)      | 694.95(4)          |             |
| Space group                                                   | P 21           | P 1 21 1           |             |
| Hall group                                                    | P 2yb          | P 2yb              |             |
| Moiety formula                                                | C16 H24 O2     | C16 H24 O2         |             |
| Sum formula                                                   | C16 H24 O2     | C16 H24 O2         |             |
| Mr                                                            | 248.35         | 248.35             |             |
| Dx, g cm-3                                                    | 1.187          | 1.187              |             |
| Z                                                             | 2              | 2                  |             |
| Mu (mm-1)                                                     | 0.593          | 0.593              |             |
| F000                                                          | 272.0          | 272.0              |             |
| F000'                                                         | 272.75         |                    |             |
| h,k,lmax                                                      | 9,13,11        | 9,13,11            |             |
| Nref                                                          | 2835[ 1497]    | 2721               |             |
| Tmin,Tmax                                                     | 0.945,0.971    | 0.636,0.754        |             |
| Tmin'                                                         | 0.915          |                    |             |
| Correction method= # Reported T Limits: Tmin=0.636 Tmax=0.754 |                |                    |             |
| AbsCorr = MULTI-SCAN                                          |                |                    |             |
| Data completeness=                                            | 1.82/0.96      | Theta(max)= 74.496 |             |
| R(reflections)=                                               | 0.0312( 2608)  | wR2(reflections)=  |             |
| S =                                                           | 1.054          | 0.0800( 2721)      |             |
|                                                               | Npar= 167      |                    |             |



**Table S3: X-ray structure of compound 8ab**

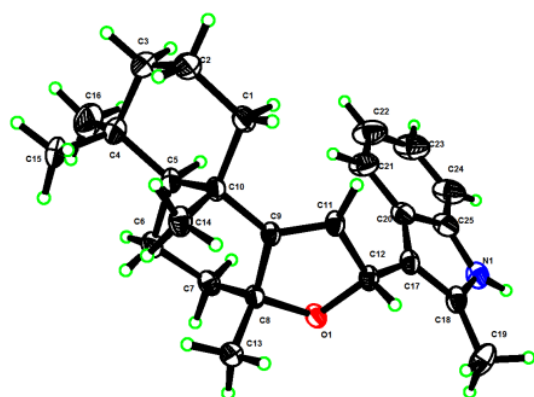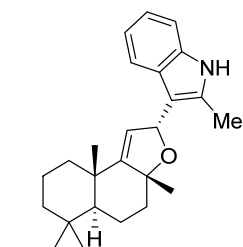

Major isomer of **8ab**

CCDC Deposition Number: 2236373.

**Datablock: cu\_20221527\_0m**

|                                                               |                       |                       |                |
|---------------------------------------------------------------|-----------------------|-----------------------|----------------|
| Bond precision:                                               | C-C = 0.0071 Å        | Wavelength=1.54178    |                |
| Cell:                                                         | a=11.2980 (14)        | b=7.7424 (10)         | c=14.2186 (18) |
|                                                               | alpha=90              | beta=101.685 (6)      | gamma=90       |
| Temperature:                                                  | 170 K                 |                       |                |
|                                                               | Calculated            | Reported              |                |
| Volume                                                        | 1218.0 (3)            | 1218.0 (3)            |                |
| Space group                                                   | P 21                  | P 1 21 1              |                |
| Hall group                                                    | P 2yb                 | P 2yb                 |                |
| Moiety formula                                                | C25 H33 N O, C H2 Cl2 | C H2 Cl2, C25 H33 N O |                |
| Sum formula                                                   | C26 H35 Cl2 N O       | C26 H35 Cl2 N O       |                |
| Mr                                                            | 448.45                | 448.45                |                |
| Dx, g cm-3                                                    | 1.223                 | 1.223                 |                |
| Z                                                             | 2                     | 2                     |                |
| Mu (mm-1)                                                     | 2.515                 | 2.515                 |                |
| F000                                                          | 480.0                 | 480.0                 |                |
| F000'                                                         | 482.51                |                       |                |
| h, k, lmax                                                    | 13, 9, 17             | 13, 9, 17             |                |
| Nref                                                          | 4657 [ 2513]          | 4315                  |                |
| Tmin, Tmax                                                    | 0.785, 0.882          | 0.545, 0.753          |                |
| Tmin'                                                         | 0.739                 |                       |                |
| Correction method= # Reported T Limits: Tmin=0.545 Tmax=0.753 |                       |                       |                |
| AbsCorr = MULTI-SCAN                                          |                       |                       |                |
| Data completeness= 1.72/0.93                                  |                       | Theta(max)= 70.362    |                |
| R(reflections)= 0.0716 ( 3939)                                |                       | wR2(reflections)=     |                |
|                                                               |                       | 0.2055 ( 4315)        |                |
| S = 1.041                                                     |                       | Npar= 294             |                |

**Figure S1: Cell cycle distribution figures of Decitabine**

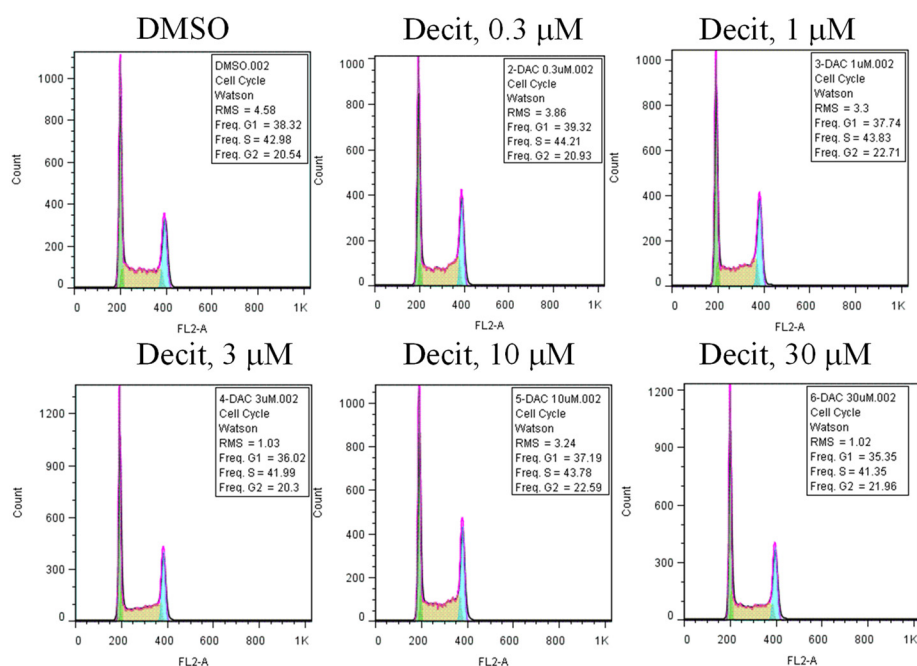

Cytometric flow analysis of cell cycle distribution of MV4-11 cells in the presence of Decitabine at the indicated concentrations for 48 h. The experiments were repeated twice.

**Figure S2: Cell cycle distribution figures of 10**

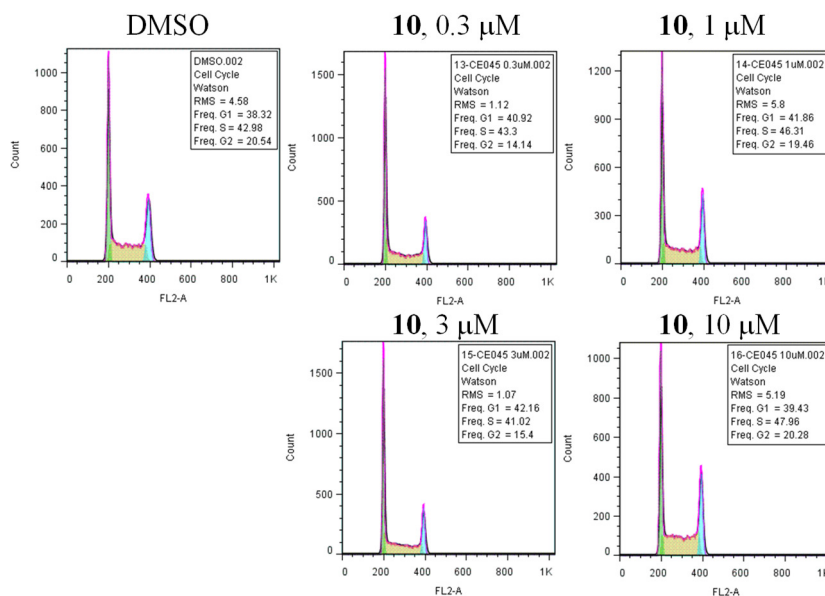

Cytometric flow analysis of cell cycle distribution of MV4-11 cells in the presence of **10** at the indicated concentrations for 48 h. The experiments were repeated twice.

**Figure S3: Cell apoptosis figures of Decitabine**

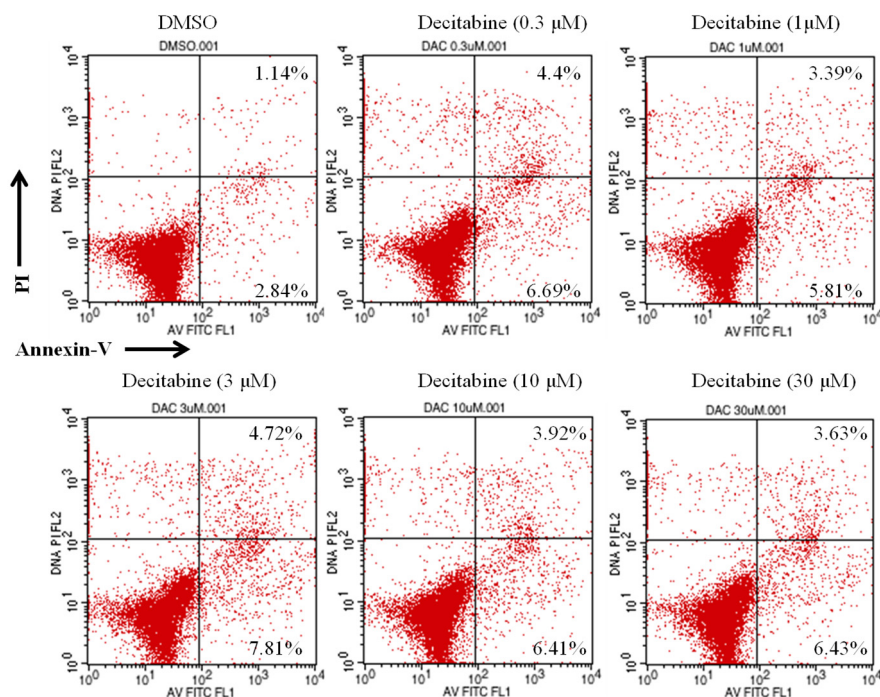

Cytometric flow analysis of cell apoptosis distribution of MV4-11 cells in the presence of Decitabine at the indicated concentrations for 48 h. The experiments were repeated twice.

**Figure S4: Cell apoptosis figures of 10**

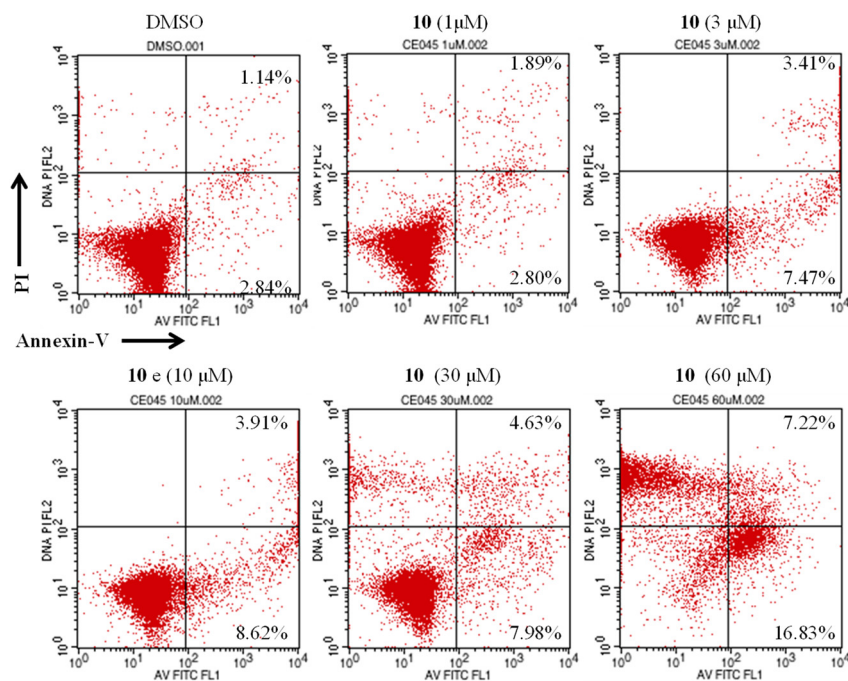

Cytometric flow analysis of cell apoptosis distribution of MV4-11 cells in the presence of 10 at the indicated concentrations for 48 h. The experiments were repeated twice.

## 1. General chemistry methods

All reactions were conducted in a round-bottomed flask equipped with a Teflon-coated magnet stirring bar. Experiments involving moisture and/or air sensitive components were performed under an N<sub>2</sub> atmosphere. Commercial reagents and anhydrous solvents were used without further purification. The crude reaction products were purified by flash column chromatography using silica gel. Proton nuclear magnetic resonance (<sup>1</sup>H NMR) was performed in Bruker Advance 400 NMR spectrometers. Carbon nuclear magnetic resonance (<sup>13</sup>C NMR) spectroscopy was performed in Bruker Advance 500 NMR spectrometers. High resolution ESI mass spectrum analysis was performed on Agilent Q-TOF mass spectrometer (G6520). The analytical UPLC model was Waters Acquity H class (UV detection at 230 nm and 254 nm) and the reverse phase column used was the Acquity UPLC® BEH (C18-1.7 μm, 2.1 × 50 mm). Further purification of final compounds for biological testing was performed on a preparative HPLC (Waters 2545) with a C18 reverse phase column. The mobile phase used here was a gradient flow of solvent A (water) and solvent B (CH<sub>3</sub>CN) at a flow rate of 10 mL/min. All final compounds were purified to ≥ 95% purity as determined by analytical UPLC analysis. Isomer ratio was determined by integration of corresponding vinyl proton or O-CH peaks in <sup>1</sup>H NMR spectrum.

## 2. Procedures for synthesis of Sclareolide derivatives

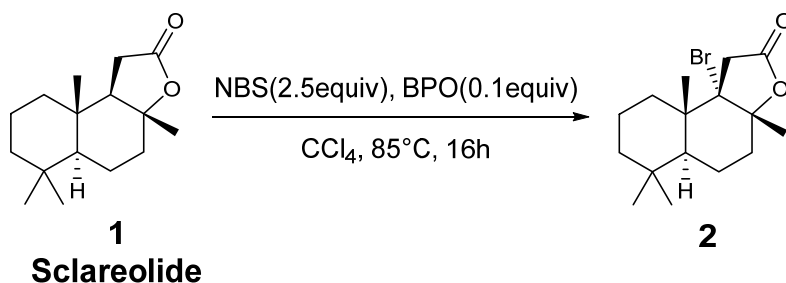

A 250 ml round-bottom flask equipped with a magnetic stirring bar was charged with **1** (5.0 g, 19.97 mmol, 1.0 equiv), N-Bromosuccinimide (8.89 g, 49.92 mmol, 2.5 equiv), dibenzoyl peroxide (483.7 mg, 1.20 mmol, 0.1 equiv) and CCl<sub>4</sub> (60 mL). The mixture was stirred at 85°C for 16 h. The resulting mixture was filtered, and the filtrate was concentrated. The crude was purified by flash column chromatography to afford the title compound **2** as a white solid (3.48 g, 53%).

**(3aR,5aS,9aS,9bS)-9b-bromo-3a,6,6,9a-tetramethyldecahydronaphtho[2,1-b]furan-2(1H)-one (2):** white solid (3.48 g, 53%). <sup>1</sup>H NMR (500 MHz, CDCl<sub>3</sub>) δ 3.54 – 3.46 (d, J = 18.0 Hz, 1H), 3.14 (d, J = 18.0 Hz, 1H), 2.25 – 2.18 (m, 1H), 1.91 (dtd, J = 12.9, 3.3, 1.6 Hz, 1H), 1.75 (s, 3H), 1.71 – 1.61 (m, 2H), 1.57 – 1.43 (m, 3H), 1.43 – 1.32 (m, 2H), 1.29 (s, 3H), 1.19 – 1.10 (m, 2H), 0.96 (s, 3H), 0.89 (s, 3H). <sup>13</sup>C NMR (126 MHz, CDCl<sub>3</sub>) δ 175.60, 94.65, 88.77, 49.55, 45.47, 43.87, 41.30, 38.50, 36.48, 33.82, 33.52, 26.18, 21.72, 18.88, 18.83, 17.98. HRMS (EI): *m/z* calculated for C<sub>16</sub>H<sub>25</sub><sup>79</sup>BrO<sub>2</sub> [M<sup>+</sup>]: 328.1032, Found: 328.1033. Specific Rotation: [α]<sub>D</sub><sup>20</sup> = -46.95° (c = 1.0 g/100 mL, in CHCl<sub>3</sub>).

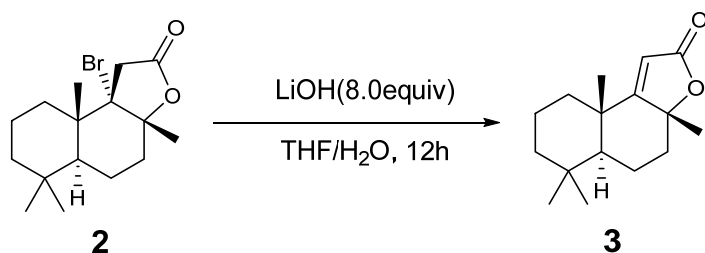

Dissolve **2** (3.48 g, 10.58 mmol, 1.0 equiv) in H<sub>2</sub>O and THF (20/20 mL) then LiOH·H<sub>2</sub>O (3.55 g, 84.62 mmol, 8.0 equiv) was added. The mixture was stirred at ambient temperature for 12 h. When the reaction was completed, adjust the pH of the solution to 6 with 1N HCl. The aqueous layer was extracted with EA (3 × 50 mL), and the combined organic layers were washed with brine (50 mL), dried over anhydrous Na<sub>2</sub>SO<sub>4</sub>, and concentrated in vacuo. The residual crude product was purified by flash column chromatography to afford the title compound **3** as a white solid (2.24 g, 85%).

**(3aR,5aS,9aS)-3a,6,6,9a-tetramethyl-4,5,5a,6,7,8,9,9a-octahydronaphtho[2,1-b]furan-2(3aH)-one (3):** white solid (2.24 g, 85%). <sup>1</sup>H NMR (500 MHz, CDCl<sub>3</sub>) δ 5.51 (s, 1H), 2.29 (dd, J = 8.9, 2.9 Hz, 1H), 1.83 – 1.68 (m, 3H), 1.63–1.57 (m, 1H), 1.56–1.53 (m, 4H), 1.51–1.50 (m, 1H), 1.49 – 1.44 (m, 2H), 1.22 – 1.15 (m, 4H), 0.96 – 0.93 (m, 1H), 0.90 (d, J = 7.8 Hz, 6H). <sup>13</sup>C NMR (126 MHz, CDCl<sub>3</sub>) δ 197.98, 173.72, 107.09, 84.78, 57.61, 41.49, 40.71, 39.66, 37.09, 34.73, 33.24, 25.22, 22.36, 19.36, 18.07, 17.91. HRMS (EI): *m/z* calculated for C<sub>16</sub>H<sub>24</sub>O<sub>2</sub> [M<sup>+</sup>]: 248.1771, Found: 248.1758. Specific Rotation: [α]<sub>D</sub><sup>20</sup> = -157.13° (C=1.0 g/100 mL, in CHCl<sub>3</sub>).

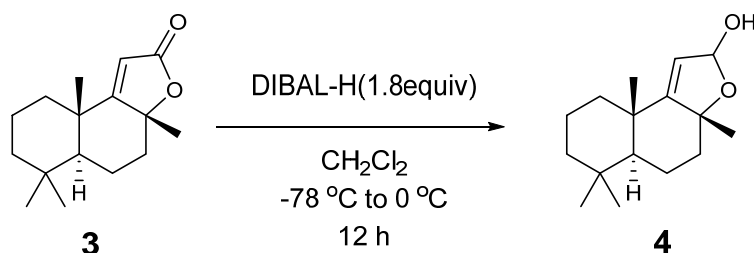

A 100 ml dry round-bottom flask equipped with a magnetic stirring bar was charged with **3** (1.2 g, 4.83 mmol, 1.0 equiv) and anhydrous CH<sub>2</sub>Cl<sub>2</sub> (40 mL), DIBAL-H (1.0 M in Hexane, 8.7 mL, 8.7 mmol, 1.8 equiv) was added at -78°C. The resulting solution was allowed to stir from -78°C to 0°C for 12h. Quench the reaction mixture with water (30 mL) then add 2N NaOH (10 mL). The aqueous layer was extracted with CH<sub>2</sub>Cl<sub>2</sub> (3 × 40 mL), and the combined organic layers were washed with brine (50 mL), dried over anhydrous Na<sub>2</sub>SO<sub>4</sub>, filtered and concentrated in vacuo to

afford the crude product **4** as a white solid (1.18 g, 98%). The crude product **4** was used for next step without further purification.

**(3aR,5aS,9aS)-3a,6,6,9a-tetramethyl-2,3a,4,5,5a,6,7,8,9,9a-decahydronaphtho[2,1-b]furan-2-ol (4):** white solid (1.18 g, 98%). <sup>1</sup>H NMR (500 MHz, CDCl<sub>3</sub>) δ 5.91 (d, *J* = 1.5 Hz, 1H), 5.19 (d, *J* = 1.5 Hz, 1H), 2.10 – 1.95 (m, 1H), 1.72 – 1.55 (m, 4H), 1.49 – 1.44 (m, 4H), 1.40 – 1.34 (m, 2H), 1.15 – 1.03 (m, 6H), 0.82 (d, *J* = 2.0 Hz, 6H). <sup>13</sup>C NMR (126 MHz, CDCl<sub>3</sub>) δ 161.79, 113.90, 102.55, 86.94, 55.52, 42.41, 42.05, 37.86, 37.65, 33.71, 33.47, 28.70, 21.58, 19.98, 18.99, 18.55.

## 1. Procedure for coupling reactions of sclareolide-indole and sclareolide-aromatic compounds

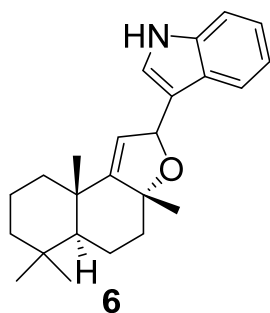

### 3-((3aR,5aS,9aS)-3a,6,6,9a-tetramethyl-2,3a,4,5,5a,6,7,8,9,9a-decahydronaphtho[2,1-b]furan-2-yl)-1H-indole (**6**):

**General method A** for the syntheses of **6**, **8a-8y**, **8ab-8af**, and **9-14**:

To a 100 mL dry round-bottom flask equipped with a magnetic stirring bar, **4** (0.20 mmol, 1.0 equiv), indole (0.16 mmol, 0.8 equiv) and anhydrous CH<sub>2</sub>Cl<sub>2</sub> (10 mL) were added. The solution was cooled to -78°C then TiCl<sub>4</sub> (1.0 M in CH<sub>2</sub>Cl<sub>2</sub>, 0.16 mmol, 0.8 equiv) was added dropwise via a syringe. The reaction mixture was allowed to stirred at -78°C for 2.5 h before quenching with NaHCO<sub>3</sub> saturated aqueous solution (15 mL). The aqueous layer was extracted with CH<sub>2</sub>Cl<sub>2</sub> (3 × 30 mL), and the combined organic layers were washed with brine (50 mL), dried over anhydrous sodium sulfate, and concentrated in vacuo. The residual crude product was purified by flash column chromatography to afford the desired product **6** (white solid, 20.4 mg, 58% yield, Isomer ratio: 69:31). <sup>1</sup>H NMR (500 MHz, CDCl<sub>3</sub>) δ 8.07 (s, 1H), 7.74 (ddd, *J* = 8.0, 5.6, 1.0 Hz, 1H), 7.35 (dt, *J* = 8.2, 1.0 Hz, 1H), 7.21 – 7.16 (m, 2H), 7.14 – 7.07 (m, 1H), 6.05 (d, *J* = 1.3 Hz, 0.69H), 6.02 (d, *J* = 1.3Hz, 0.31H), 5.50 (d, *J* = 1.2Hz, 0.31H), 5.40 (d, *J* = 1.2 Hz, 0.69H), 2.07 (ddt, *J* = 12.7, 6.6, 2.8 Hz, 1H), 1.81 – 1.64 (m, 4H), 1.55 – 1.38 (m, 7H), 1.34 – 1.14 (m, 5H), 1.08 (ddd, *J* = 50.3, 12.2, 2.3 Hz, 1H), 0.94 – 0.88 (m, 6H). <sup>13</sup>C NMR (126 MHz, CDCl<sub>3</sub>) δ 157.03, 156.15, 136.97, 136.78, 126.21, 126.09, 123.30, 122.81, 121.93, 119.74, 119.61, 119.45, 119.42, 118.09, 117.42, 117.05, 115.77, 111.47, 111.39, 87.67, 87.20, 78.79, 78.30, 56.06, 55.22, 53.55, 42.79, 42.33, 42.28, 42.20, 38.21, 38.18, 38.14, 37.87, 33.83, 33.77, 33.63, 33.54, 28.68, 26.63, 21.63, 21.58, 20.52, 20.33, 20.15, 19.80, 18.74, 18.68. HRMS (ESI): *m/z* calculated for C<sub>24</sub>H<sub>32</sub>NO [M+H]<sup>+</sup>: 350.2484, Found [M+H]<sup>+</sup>: 350.2484.

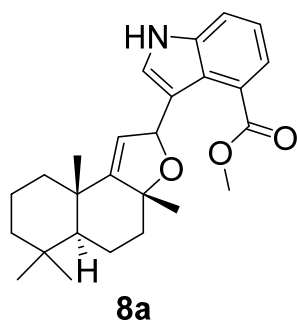

**Methyl 3-((3aR,5aS,9aS)-3a,6,6,9a-tetramethyl-2,3a,4,5,5a,6,7,8,9,9a-decahydronaphtho[2,1-b]furan-2-yl)-1H-indole-4-carboxylate (8a).** Method A: **4** (50 mg, 0.20 mmol), methyl indole-4-carboxylate (28.0 mg, 0.16 mmol),  $\text{TiCl}_4$  (0.16 mL, 0.16 mmol) and  $\text{CH}_2\text{Cl}_2$  (10 mL) were used to afford the desired product **8a** as yellow oil (33.8 mg, 52% yield, Isomer ratio: 51:49).  $^1\text{H}$  NMR (500 MHz,  $\text{CDCl}_3$ )  $\delta$  7.91 (ddd,  $J = 7.3, 6.2, 0.9$  Hz, 1H), 7.77 (dd,  $J = 12.2, 8.2$  Hz, 1H), 7.36 (d,  $J = 3.4$  Hz, 0.49H), 7.32 (d,  $J = 3.4$  Hz, 0.51H), 7.18 (d,  $J = 3.3$  Hz, 0.49H), 7.14 (d,  $J = 3.3$  Hz, 0.51H), 6.79 (d,  $J = 1.8$  Hz, 1H), 5.44 (d,  $J = 1.8$  Hz, 1H), 5.34 (d,  $J = 1.1$  Hz, 1H), 3.97 (s, 3H), 2.07 (ddt,  $J = 40.6, 12.2, 3.1$  Hz, 1H), 1.89 – 1.70 (m, 4H), 1.55 – 1.33 (m, 6H), 1.31 – 1.19 (m, 5H), 1.12 (dd,  $J = 12.2, 2.4$  Hz, 0.49H), 1.00 (dd,  $J = 12.2, 2.5$  Hz, 0.51H), 0.96 – 0.89 (m, 6H).  $^{13}\text{C}$  NMR (126 MHz,  $\text{CDCl}_3$ )  $\delta$  168.17, 163.61, 163.05, 137.32, 137.13, 129.06, 126.87, 123.69, 123.63, 121.75, 121.66, 121.20, 121.12, 114.96, 114.69, 112.72, 111.03, 104.08, 103.44, 89.09, 88.32, 88.19, 87.49, 55.99, 55.81, 51.82, 42.86, 42.35, 42.12, 38.58, 38.38, 38.11, 34.00, 33.93, 33.56, 27.86, 27.59, 21.64, 20.39, 20.18, 19.69, 19.42, 18.63. HRMS (ESI):  $m/z$  calculated for  $\text{C}_{26}\text{H}_{33}\text{NNaO}_3$   $[\text{M}+\text{Na}]^+$ : 430.2358, Found  $[\text{M}+\text{Na}]^+$ : 430.2356.

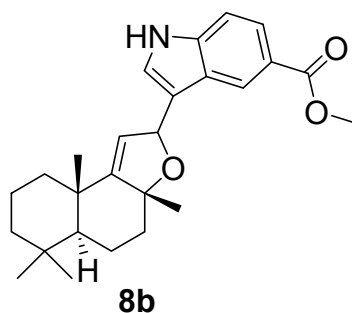

**methyl 3-((3aR,5aS,9aS)-3a,6,6,9a-tetramethyl-2,3a,4,5,5a,6,7,8,9,9a-decahydronaphtho[2,1-b]furan-2-yl)-1H-indole-5-carboxylate (8b):** Method A: **4** (50 mg, 0.20 mmol), methyl indole-5-carboxylate (28.0 mg, 0.16 mmol),  $\text{TiCl}_4$  (0.16 mL, 0.16 mmol) and  $\text{CH}_2\text{Cl}_2$  (10 mL) were used to afford the desired product **8b** as yellow oil (60.3 mg, 92% yield, Isomer ratio: 76:24).  $^1\text{H}$  NMR (500 MHz,  $\text{Methanol-}d_4$ )  $\delta$  8.53 (d,  $J = 1.6$  Hz, 1H), 7.80 (dt,  $J = 8.6, 2.1$  Hz, 1H), 7.39 (dd,  $J = 8.7, 1.8$  Hz, 1H), 7.34 (d,  $J = 2.0$  Hz, 0.76H), 7.25 (d,  $J = 2.0$  Hz, 0.24H), 6.00-5.98 (m, 7 Hz, 1H), 5.52 (d,  $J = 3.7$  Hz, 0.24H), 5.39 (d,  $J = 3.6$  Hz, 0.76H), 3.89 (d,  $J = 2.4$  Hz, 3H), 2.02 (ddd,  $J = 11.9, 4.5, 2.8$  Hz, 1H), 1.89 – 1.76 (m, 4H), 1.63 – 1.53 (m, 4H), 1.51 – 1.34 (m, 4H), 1.29-1.22 (m, 4H), 1.04 – 0.90 (m, 6H).  $^{13}\text{C}$  NMR (126 MHz,  $\text{CDCl}_3$ )  $\delta$  168.33, 157.64, 156.47, 139.66, 139.49, 125.70, 124.64, 124.13, 123.59, 123.40, 122.98, 122.88, 121.57, 118.51, 117.07, 115.53, 111.15, 111.07, 87.98, 87.50, 78.58, 78.04, 56.14, 55.02, 52.01, 51.92, 42.89, 42.32, 42.17, 38.33, 38.27, 38.18, 37.96, 33.87, 33.82, 33.56, 33.53, 28.44, 26.68, 21.69, 21.59, 20.57, 20.34,

20.15, 19.55, 18.73. HRMS (ESI):  $m/z$  calculated for  $C_{26}H_{34}NO_3$   $[M+H]^+$ : 408.2539, Found  $[M+H]^+$ : 408.2533.

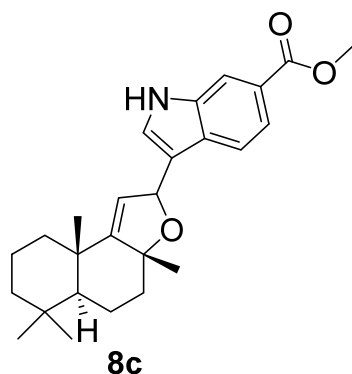

**Methyl 3-((3aR,5aS,9aS)-3a,6,6,9a-tetramethyl-2,3a,4,5,5a,6,7,8,9,9a-decahydronaphtho[2,1-b]furan-2-yl)-1H-indole-6-carboxylate (8c):** Method A: **4** (50 mg, 0.20 mmol), methyl indole-6-carboxylate (28.0 mg, 0.16 mmol),  $TiCl_4$  (0.16 mL, 0.16 mmol) and  $CH_2Cl_2$  (10 mL) were used to afford the desired product **8c** as yellow oil (47.4 mg, 73% yield, Isomer ratio: 69:31).  $^1H$  NMR (500 MHz, Methanol- $d_4$ )  $\delta$  8.10 (dd,  $J$  = 4.7, 1.6 Hz, 1H), 7.74 (dd,  $J$  = 8.4, 2.2 Hz, 1H), 7.69 (td,  $J$  = 8.2, 1.5 Hz, 1H), 7.44 (s, 0.69H), 7.35 (s, 0.31H), 6.04 (d,  $J$  = 1.2 Hz, 0.69H), 6.00 (d,  $J$  = 1.3 Hz, 0.31H), 5.40 (d,  $J$  = 1.3 Hz, 1H), 3.91 (d,  $J$  = 1.1 Hz, 3H), 2.04-2.01(m, 1H), 1.87 – 1.72 (m, 4H), 1.63 (td,  $J$  = 12.3, 10.7, 2.7 Hz, 1H), 1.58 – 1.55 (m, 1H), 1.53-1.44 (m, 4H), 1.35 – 1.21 (m, 5H), 1.19 (d,  $J$  = 2.4 Hz, 0.69H), 1.06 – 1.01 (m, 0.36H), 0.99 – 0.91 (m, 6H).  $^{13}C$  NMR (126 MHz,  $CDCl_3$ )  $\delta$  168.33, 157.58, 156.76, 136.30, 136.10, 129.82, 126.45, 125.86, 123.75, 120.70, 120.67, 119.42, 119.25, 118.13, 117.06, 115.40, 113.80, 87.84, 87.40, 78.37, 77.92, 56.06, 55.36, 52.08, 42.73, 42.41, 42.29, 42.21, 38.28, 38.18, 37.95, 33.86, 33.82, 33.64, 33.56, 28.74, 26.59, 21.65, 21.59, 20.52, 20.35, 20.13, 19.82, 18.75, 18.69. HRMS (ESI):  $m/z$  calculated for  $C_{26}H_{34}NO_3$   $[M+H]^+$ : 408.2539, Found  $[M+H]^+$ : 408.2529.

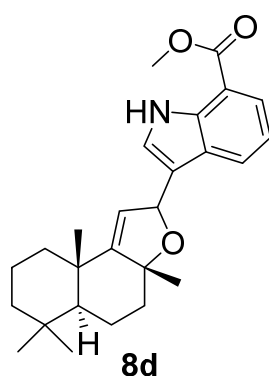

**Methyl 3-((3aR,5aS,9aS)-3a,6,6,9a-tetramethyl-2,3a,4,5,5a,6,7,8,9,9a-decahydronaphtho[2,1-b]furan-2-yl)-1H-indole-7-carboxylate (8d):** Method A: **4** (50 mg, 0.20 mmol), methyl indole-7-carboxylate (28.0 mg, 0.16 mmol),  $TiCl_4$  (0.16 mL, 0.16 mmol) and  $CH_2Cl_2$  (10 mL) were used to afford the desired product **8d** as yellow oil (38.9 mg, 60% yield, Isomer ratio: 82:18).  $^1H$  NMR (500 MHz,  $CDCl_3$ )  $\delta$  9.74 (s, 1H), 7.97 (dt,  $J$  = 8.0, 0.8 Hz, 1H), 7.88 (dd,  $J$  = 7.6, 1.1 Hz, 1H), 7.29 (d,  $J$  = 2.4 Hz, 0.82H), 7.22 (d,  $J$  = 1.3 Hz, 0.18H), 7.14 (td,  $J$  = 7.7, 1.6 Hz, 1H), 6.04



(dd,  $J = 14.5, 1.6$  Hz, 1H), 5.49 (d,  $J = 1.3$  Hz, 0.18H), 5.38 (d,  $J = 1.1$  Hz, 0.82H), 3.97 (d,  $J = 1.4$  Hz, 3H), 2.13 – 2.02 (m, 1H), 1.75 (qt,  $J = 14.2, 2.5$  Hz, 4H), 1.55 – 1.43 (m, 6H), 1.34 – 1.00 (m, 6H), 0.95 – 0.88 (m, 6H).  $^{13}\text{C}$  NMR (126 MHz,  $\text{CDCl}_3$ )  $\delta$  168.04, 157.56, 136.88, 127.47, 125.63, 125.48, 124.50, 123.98, 123.36, 118.94, 117.92, 117.19, 115.46, 112.61, 87.72, 87.28, 78.28, 77.91, 56.04, 55.42, 52.00, 42.76, 42.50, 42.22, 38.28, 38.20, 37.93, 33.86, 33.82, 33.65, 33.57, 28.81, 26.52, 21.66, 21.60, 20.51, 20.37, 20.14, 19.89, 18.70. HRMS (ESI):  $m/z$  calculated for  $\text{C}_{26}\text{H}_{34}\text{NO}_3$   $[\text{M}+\text{H}]^+$ : 408.2539, Found  $[\text{M}+\text{H}]^+$ : 408.2528.

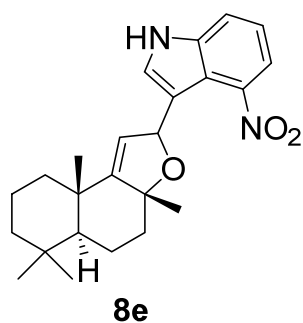

**4-nitro-3-((3aR,5aS,9aS)-3a,6,6,9a-tetramethyl-2,3a,4,5,5a,6,7,8,9,9a-decahydronaphtho[2,1-b]furan-2-yl)-1H-indole (8e):** Method A: **4** (50 mg, 0.20 mmol), 4-nitroindole (25.9 mg, 0.16 mmol),  $\text{TiCl}_4$  (0.16 mL, 0.16 mmol) and  $\text{CH}_2\text{Cl}_2$  (10 mL) were used to afford major isomer **8e** (13.0 mg, 21% yield) and minor isomer **8e'** (6.0 mg, 10% yield) both as yellow oil (Isomer ratio: 68:32). **8e**:  $^1\text{H}$  NMR (500 MHz,  $\text{CDCl}_3$ )  $\delta$  8.16 (d,  $J = 7.8$  Hz, 1H), 7.91 (d,  $J = 8.1$  Hz, 1H), 7.43 (d,  $J = 3.3$  Hz, 1H), 7.30 (t,  $J = 8.1$  Hz, 1H), 7.24 (d,  $J = 3.3$  Hz, 1H), 6.79 (d,  $J = 1.7$  Hz, 1H), 5.45 (d,  $J = 1.8$  Hz, 1H), 2.12 (dt,  $J = 12.0, 3.1$  Hz, 1H), 1.91 – 1.73 (m, 4H), 1.57 – 1.40 (m, 3H), 1.34 (s, 3H), 1.27 – 1.18 (m, 5H), 1.00 (dd,  $J = 12.3, 2.5$  Hz, 1H), 0.91 (d,  $J = 3.2$  Hz, 6H).  $^{13}\text{C}$  NMR (126 MHz,  $\text{CDCl}_3$ )  $\delta$  164.39, 140.46, 138.59, 129.17, 123.64, 120.92, 118.04, 117.02, 110.50, 102.74, 88.66, 87.71, 55.78, 42.77, 42.07, 38.65, 38.09, 33.94, 33.56, 27.82, 21.63, 20.14, 19.66, 18.61. HRMS (ESI):  $m/z$  calculated for Found  $\text{C}_{24}\text{H}_{30}\text{N}_2\text{NaO}_3$   $[\text{M}+\text{Na}]^+$ : 417.2154, Found  $[\text{M}+\text{Na}]^+$ : 417.2150. Specific Rotation:  $[\alpha]^{20} = +40.52^\circ$  ( $c = 1.0$  g/100 mL, in  $\text{CHCl}_3$ ). **8e'**:  $^1\text{H}$  NMR (500 MHz,  $\text{CDCl}_3$ )  $\delta$  8.14 (dd,  $J = 8.0, 0.8$  Hz, 1H), 7.88 (d,  $J = 8.2$  Hz, 1H), 7.47 (d,  $J = 3.4$  Hz, 1H), 7.31 – 7.27 (m, 2H), 6.97 (d,  $J = 1.1$  Hz, 1H), 5.35 (d,  $J = 1.1$  Hz, 1H), 2.05 (dt,  $J = 11.9, 3.0$  Hz, 1H), 1.85 – 1.71 (m, 4H), 1.58 – 1.55 (m, 1H), 1.54 (s, 3H), 1.52 – 1.44 (m, 2H), 1.38 – 1.16 (m, 5H), 1.13 – 1.01 (m, 1H), 0.93 (d,  $J = 18.9$  Hz, 6H).  $^{13}\text{C}$  NMR (126 MHz,  $\text{CDCl}_3$ )  $\delta$  163.78, 140.50, 138.40, 129.16, 123.58, 120.90, 118.02, 116.66, 112.12, 103.40, 89.60, 88.49, 56.06, 42.35, 42.04, 38.65, 38.38, 34.03, 33.55, 27.58, 21.65, 20.36, 19.37, 18.59. HRMS (ESI):  $m/z$  calculated for Found  $\text{C}_{24}\text{H}_{30}\text{N}_2\text{NaO}_3$   $[\text{M}+\text{Na}]^+$ : 417.2154, Found  $[\text{M}+\text{Na}]^+$ : 417.2153. Specific Rotation:  $[\alpha]^{20} = -53.38^\circ$  ( $c = 1.0$  g/100 mL, in  $\text{CHCl}_3$ ).

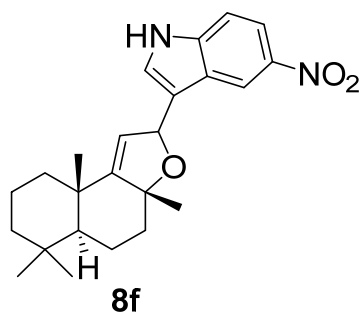

**5-nitro-3-((3aR,5aS,9aS)-3a,6,6,9a-tetramethyl-2,3a,4,5,5a,6,7,8,9,9a-decahydronaphtho[2,1-b]furan-2-yl)-1H-indole (8f):** Method A: **4** (50 mg, 0.20 mmol), 5-nitroindole (25.9 mg, 0.16 mmol), TiCl<sub>4</sub> (0.16 mL, 0.16 mmol) and CH<sub>2</sub>Cl<sub>2</sub> (10 mL) were used to afford the desired product **8f** as yellow oil (42.0 mg, 67% yield, Isomer ratio: 85:15). <sup>1</sup>H NMR (500 MHz, Methanol-d<sub>4</sub>) δ 8.80 (d, J = 2.3 Hz, 0.85H), 8.74 (d, J = 2.3Hz, 0.15H), 8.05 (dd, J = 9.0, 2.2 Hz, 1H), 7.50 – 7.36 (m, 2H), 5.99 (d, J = 1.3 Hz, 1H), 5.54 (d, J = 1.4Hz, 0.15H), 5.39 (d, J = 1.2 Hz, 0.85H), 2.07 – 2.00 (m, 1H), 1.90 – 1.76 (m, 4H), 1.64 (dt, J = 11.8, 5.7 Hz, 1H), 1.58 (dt, J = 14.8, 3.2 Hz, 1H), 1.54-1.43 (m, 6H), 1.42 – 1.22 (m, 4H), 1.06 – 0.92 (m, 6H). <sup>13</sup>C NMR (126 MHz, CDCl<sub>3</sub>) δ 158.31, 141.50, 140.12, 126.42, 125.70, 125.58, 119.50, 117.79, 117.72, 116.60, 111.37, 87.96, 77.81, 54.79, 42.12, 41.94, 38.41, 38.11, 33.88, 33.55, 33.44, 28.49, 27.00, 21.70, 21.59, 20.31, 20.03, 19.65, 18.71. HRMS (ESI): *m/z* calculated for Found C<sub>24</sub>H<sub>31</sub>N<sub>2</sub>O<sub>3</sub> [M+H]<sup>+</sup>: 395.2335, Found [M+H]<sup>+</sup>: 395.2332.

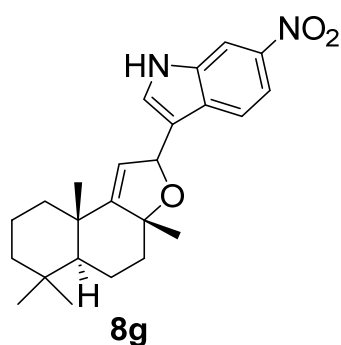

**6-nitro-3-((3aR,5aS,9aS)-3a,6,6,9a-tetramethyl-2,3a,4,5,5a,6,7,8,9,9a-decahydronaphtho[2,1-b]furan-2-yl)-1H-indole (8g):** Method A: **4** (50 mg, 0.20 mmol), 6-nitroindole (25.9 mg, 0.16 mmol), TiCl<sub>4</sub> (0.16 mL, 0.16 mmol) and CH<sub>2</sub>Cl<sub>2</sub> (10 mL) were used to afford the desired product **8g** as yellow oil (34.9 mg, 55% yield, Isomer ratio: 69:31). <sup>1</sup>H NMR (500 MHz, CDCl<sub>3</sub>) δ 8.76 (d, J = 13.1 Hz, 1H), 8.28 (dd, J = 3.5, 2.0 Hz, 1H), 8.00 (ddd, J = 8.8, 4.5, 2.0 Hz, 1H), 7.78 (d, J = 8.8 Hz, 1H), 7.44 (d, J = 2.4 Hz, 0.69H), 7.37 (d, J = 2.3Hz, 0.31H), 6.04 (d, J = 1.2 Hz, 0.69H), 6.00 (d, J = 1.2Hz, 0.31H), 5.46 (d, J = 1.3Hz, 0.31H), 5.35 (d, J = 1.2 Hz, 0.69H), 2.08 (ddt, J = 15.9, 12.0, 3.1 Hz, 1H), 1.82 – 1.70 (m, 4H), 1.58 – 1.44 (m, 6H), 1.36 – 1.14 (m, 5H), 1.10 – 1.00 (m, 1H), 0.95 – 0.88 (m, 6H). <sup>13</sup>C NMR (126 MHz, CDCl<sub>3</sub>) δ 158.14, 157.33, 143.35, 135.39, 135.23, 130.95, 128.84, 128.27, 119.65, 119.53, 118.71, 116.65, 115.17, 114.97, 108.37, 88.17, 87.68, 78.03, 77.61, 56.06, 55.49, 42.67, 42.46, 42.26, 42.19, 38.36, 38.32, 38.19, 38.02, 33.88, 33.84, 33.64, 33.55, 28.75, 26.52, 21.65, 21.59, 20.49, 20.32, 20.11, 19.83, 18.73, 18.67. HRMS (ESI): *m/z* calculated for Found C<sub>24</sub>H<sub>31</sub>N<sub>2</sub>O<sub>3</sub> [M+H]<sup>+</sup>: 395.2335, Found [M+H]<sup>+</sup>: 395.2328.

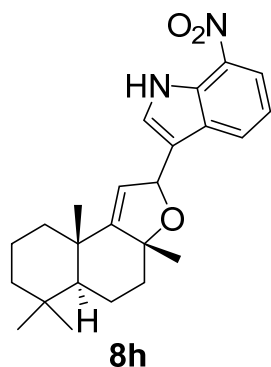

**7-nitro-3-((3aR,5aS,9aS)-3a,6,6,9a-tetramethyl-2,3a,4,5,5a,6,7,8,9,9a-decahydronaphtho[2,1-b]furan-2-yl)-1H-indole (8h):** Method A: **4** (50 mg, 0.20 mmol), 7-nitroindole (25.9 mg, 0.16 mmol), TiCl<sub>4</sub> (0.16 mL, 0.16 mmol) and CH<sub>2</sub>Cl<sub>2</sub> (10 mL) were used to afford the desired product **8h** as yellow oil (61.5 mg, 87% yield, Isomer ratio: 68:32). <sup>1</sup>H NMR (500 MHz, CDCl<sub>3</sub>) δ 9.81 (s, 1H), 8.16 (d, *J* = 8.1 Hz, 1H), 8.11 (dd, *J* = 11.0, 7.7 Hz, 1H), 7.37 (d, *J* = Hz, 0.32H), 7.29 (d, *J* = 2.4 Hz, 0.68H), 7.20 (td, *J* = 7.9, 1.3 Hz, 1H), 6.06 (d, *J* = 1.9Hz, 0.31H), 6.01 (d, *J* = 1.9Hz, 0.68H), 5.48 (d, *J* = 1.9 Hz, 0.68H), 5.31 (d, *J* = 1.8Hz, 0.31H), 2.08 (ddt, *J* = 15.1, 12.0, 3.2 Hz, 1H), 1.81 – 1.69 (m, 4H), 1.57 – 1.42 (m, 6H), 1.29 – 1.15 (m, 5H), 1.05 (ddd, *J* = 26.4, 12.3, 2.4 Hz, 1H), 0.94 – 0.88 (m, 6H). <sup>13</sup>C NMR (126 MHz, CDCl<sub>3</sub>) δ 158.13, 157.54, 133.00, 130.30, 130.12, 128.07, 127.98, 125.12, 124.44, 120.75, 119.53, 119.43, 119.11, 116.63, 114.88, 88.02, 87.56, 77.82, 77.49, 55.97, 55.50, 42.66, 42.49, 42.24, 42.17, 38.28, 38.18, 37.96, 33.85, 33.81, 33.62, 33.54, 28.79, 26.44, 21.63, 21.57, 20.44, 20.31, 20.08, 19.86, 18.71, 18.65. HRMS (ESI): *m/z* calculated for Found C<sub>24</sub>H<sub>31</sub>N<sub>2</sub>O<sub>3</sub> [M+H]<sup>+</sup>: 395.2335, Found [M+H]<sup>+</sup>: 395.2329.

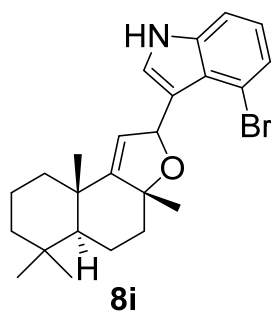

**4-bromo-3-((3aR,5aS,9aS)-3a,6,6,9a-tetramethyl-2,3a,4,5,5a,6,7,8,9,9a-decahydronaphtho[2,1-b]furan-2-yl)-1H-indole (8i):** Method A: **4** (50 mg, 0.20 mmol), 4-bromo-1H-indole (31.4 mg, 0.16 mmol), TiCl<sub>4</sub> (0.16 mL, 0.16 mmol) and CH<sub>2</sub>Cl<sub>2</sub> (10 mL) were used to afford the desired product **8i** as yellow oil (29.6 mg, 43% yield, Isomer ratio: 62:38). <sup>1</sup>H NMR (500 MHz, Methanol-*d*<sub>4</sub>) δ 7.34 (ddd, *J* = 8.1, 3.7, 0.9 Hz, 1H), 7.26 (d, *J* = 0.9 Hz, 0.62H), 7.23 (d, *J* = 0.9Hz, 0.38H), 7.19 (ddd, *J* = 7.6, 2.6, 0.9 Hz, 1H), 6.96 (t, *J* = 7.8 Hz, 1H), 6.71 (t, *J* = 1.1 Hz, 0.62H), 6.63 (d, *J* = 1.2Hz, 0.38H), 5.55 (d, *J* = 1.3Hz, 0.38H), 5.49 (d, *J* = 1.2 Hz, 0.62H), 2.07 (ddt, *J* = 24.2, 11.8, 2.9 Hz, 1H), 1.81 – 1.70 (m, 3H), 1.69 – 1.54 (m, 2H), 1.53 – 1.45 (m, 5H), 1.45 – 1.39 (m, 1H), 1.29 – 1.16 (m, 4H), 1.03 (dt, *J* = 12.2, 2.6 Hz, 1H), 0.92 – 0.88 (m, 6H). <sup>13</sup>C NMR (126 MHz, CDCl<sub>3</sub>) δ 155.13, 155.02, 137.74, 124.74, 123.94, 123.83, 123.16, 122.73, 122.66, 120.39, 120.24, 119.12, 117.88, 113.77, 113.66, 110.61, 87.95, 87.48, 79.01, 78.42, 55.92, 55.26, 43.20, 42.75, 42.24, 42.10, 38.05, 37.99, 37.69, 33.81, 33.72, 33.52, 33.49, 29.82, 29.25, 26.92, 21.60,

21.56, 20.53, 20.36, 20.03, 19.76, 18.72, 18.63. HRMS (ESI):  $m/z$  calculated for  $C_{24}H_{31}^{79}BrNO$   $[M+H]^+$ : 428.1589,  $C_{24}H_{31}^{81}BrNO$   $[M+H]^+$ : 430.1569, Found  $[M+H]^+$ : 428.1585, 430.1576.

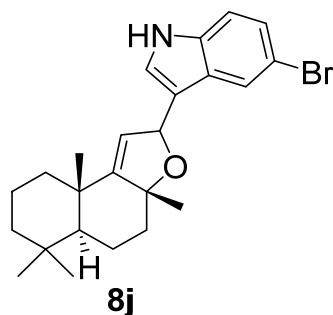

**5-bromo-3-((3aR,5aS,9aS)-3a,6,6,9a-tetramethyl-2,3a,4,5,5a,6,7,8,9,9a-decahydronaphtho[2,1-b]furan-2-yl)-1H-indole (8j):** Method A: **4** (50 mg, 0.20 mmol), 5-bromine indole (31.4 mg, 0.16 mmol),  $TiCl_4$  (0.16 mL, 0.16 mmol) and  $CH_2Cl_2$  (10 mL) were used to afford the desired product **8j** as yellow oil (50.0 mg, 73% yield, Isomer ratio: 76:24).  $^1H$  NMR (500 MHz, Methanol- $d_4$ )  $\delta$  7.92 (d,  $J$  = 1.9 Hz, 0.76H), 7.84 (d,  $J$  = 1.9Hz, 0.24H), 7.31 – 7.15 (m, 3H), 5.97 – 5.91 (m, 1H), 5.50 (d,  $J$  = 2.2Hz, 0.24H), 5.36 (d,  $J$  = 2.1Hz, 0.76H), 2.02 (dt,  $J$  = 12.1, 3.0 Hz, 1H), 1.86 – 1.76 (m, 4H), 1.65 – 1.55 (m, 3H), 1.52-1.43 (m, 3H), 1.37 – 1.30 (m, 2H), 1.25-1.21 (m, 3H), 1.13 – 0.89 (m, 7H).  $^{13}C$  NMR (126 MHz,  $CDCl_3$ )  $\delta$  157.34, 156.67, 135.64, 135.40, 127.88, 124.84, 124.76, 124.54, 123.86, 122.88, 122.35, 118.03, 117.09, 116.77, 115.36, 112.86, 112.78, 112.73, 87.87, 87.57, 78.41, 78.09, 56.08, 55.04, 42.79, 42.29, 42.22, 42.11, 38.37, 38.30, 38.18, 38.03, 33.86, 33.56, 28.62, 27.03, 21.62, 21.59, 20.52, 20.35, 20.05, 19.77, 18.75, 18.70. HRMS (ESI):  $m/z$  calculated for  $C_{24}H_{31}^{79}BrNO$   $[M+H]^+$ : 428.1589,  $C_{24}H_{31}^{81}BrNO$   $[M+H]^+$ : 430.1569, Found  $[M+H]^+$ : 428.1578, 430.1577.

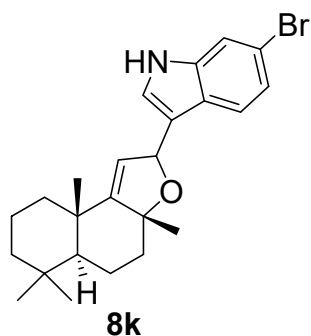

**6-bromo-3-((3aR,5aS,9aS)-3a,6,6,9a-tetramethyl-2,3a,4,5,5a,6,7,8,9,9a-decahydronaphtho[2,1-b]furan-2-yl)-1H-indole (8k):** Method A: **4** (50 mg, 0.20 mmol), 6-bromine indole (31.4 mg, 0.16 mmol),  $TiCl_4$  (0.16 mL, 0.16 mmol) and  $CH_2Cl_2$  (10 mL) were used to afford the desired product **8j** as yellow oil (41.9 mg, 61% yield, Isomer ratio: 71:29).  $^1H$  NMR (500 MHz,  $CDCl_3$ )  $\delta$  8.11 (s, 1H), 7.60 (dd,  $J$  = 8.5, 3.7 Hz, 1H), 7.49 (d,  $J$  = 1.7 Hz, 1H), 7.22 – 7.18 (m, 1H), 7.15 (d,  $J$  = 2.4 Hz, 0.71H), 7.08 (d,  $J$  = 2.4Hz, 0.29H), 6.00 (d,  $J$  = 1.2 Hz, 0.71H), 5.96 (d,  $J$  = 1.2Hz, 0.29H), 5.46 (d,  $J$  = 1.3Hz, 0.29H), 5.35 (d,  $J$  = 1.2 Hz, 0.71H), 2.11 – 2.03 (m, 1H), 1.78 – 1.66 (m, 4H), 1.53 – 1.43 (m, 6H), 1.31 – 1.14 (m, 5H), 1.05 (ddd,  $J$  = 38.5, 12.2, 2.2 Hz, 1H), 0.93 – 0.88 (m, 6H).  $^{13}C$  NMR (126 MHz,  $CDCl_3$ )  $\delta$  157.54, 156.74, 137.74, 137.55, 125.11, 123.61, 123.05, 122.93, 121.07, 120.95, 117.83, 117.10, 115.73, 115.42, 114.30, 114.23, 87.79, 87.32,

78.40, 77.96, 56.06, 55.38, 42.74, 42.40, 42.29, 42.22, 38.27, 38.19, 37.94, 33.87, 33.82, 33.65, 33.56, 28.72, 26.56, 21.65, 21.60, 20.52, 20.34, 20.14, 19.84, 18.75, 18.69. HRMS (ESI):  $m/z$  calculated for  $C_{24}H_{31}^{79}BrNO$   $[M+H]^+$ : 428.1589,  $C_{24}H_{31}^{81}BrNO$   $[M+H]^+$ : 430.1569, Found  $[M+H]^+$ : 428.1580, 430.1578.

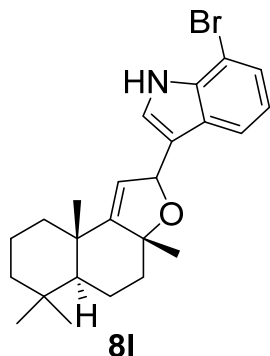

**7-bromo-3-((3aR,5aS,9aS)-3a,6,6,9a-tetramethyl-2,3a,4,5,5a,6,7,8,9,9a-decahydronaphtho[2,1-b]furan-2-yl)-1H-indole (8l):** Method A: **4** (50 mg, 0.20 mmol), 7-bromine indole (31.4 mg, 0.16 mmol),  $TiCl_4$  (0.16 mL, 0.16 mmol) and  $CH_2Cl_2$  (10 mL) were used to afford the desired product **8j** as yellow oil (46.5 mg, 68% yield, Isomer ratio: 70:30).  $^1H$  NMR (500 MHz,  $CDCl_3$ )  $\delta$  8.23 (s, 1H), 7.68 (t,  $J$  = 8.1 Hz, 1H), 7.34 (dd,  $J$  = 7.6, 0.9 Hz, 1H), 7.22 (dd,  $J$  = 30.3, 2.5 Hz, 1H), 6.99 (td,  $J$  = 7.8, 1.4 Hz, 1H), 6.02 (d,  $J$  = 1.2 Hz, 0.7H), 5.98 (d,  $J$  = 1.3 Hz, 0.3H), 5.48 (d,  $J$  = 1.7 Hz, 0.3H), 5.37 (d,  $J$  = 1.6 Hz, 0.7H), 2.11 – 2.04 (m, 1H), 1.79 – 1.64 (m, 4H), 1.53 – 1.42 (m, 6H), 1.32 – 1.14 (m, 5H), 1.05 (ddd,  $J$  = 37.3, 12.2, 2.2 Hz, 1H), 0.93 – 0.88 (m, 5H).  $^{13}C$  NMR (126 MHz,  $CDCl_3$ )  $\delta$  157.51, 135.60, 127.38, 124.51, 123.34, 122.76, 120.84, 119.31, 119.12, 119.00, 117.00, 115.34, 104.89, 87.78, 87.34, 78.58, 78.16, 56.03, 55.36, 42.74, 42.47, 42.29, 42.21, 38.24, 38.18, 37.93, 33.86, 33.81, 33.64, 33.57, 28.78, 26.56, 21.65, 21.60, 20.51, 20.36, 20.13, 19.84, 18.75, 18.69. HRMS (ESI):  $m/z$  calculated for  $C_{24}H_{31}^{79}BrNO$   $[M+H]^+$ : 428.1589,  $C_{24}H_{31}^{81}BrNO$   $[M+H]^+$ : 430.1569, Found  $[M+H]^+$ : 428.1586, 430.1576.

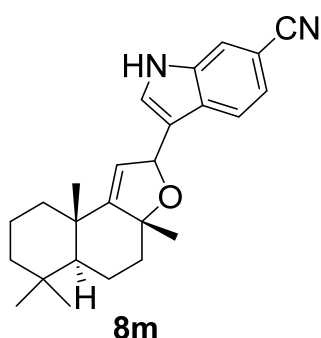

**3-((3aR,5aS,9aS)-3a,6,6,9a-tetramethyl-2,3a,4,5,5a,6,7,8,9,9a-decahydronaphtho[2,1-b]furan-2-yl)-1H-indole-6-carbonitrile (8m):** Method A: **4** (50 mg, 0.20 mmol), 6-cyanoindole (22.7 mg, 0.16 mmol),  $TiCl_4$  (0.16 mL, 0.16 mmol) and  $CH_2Cl_2$  (10 mL) were used to afford the desired product **8m** as yellow oil (50.4 mg, 84% yield, Isomer ratio: 67:33).  $^1H$  NMR (500 MHz, Methanol- $d_4$ )  $\delta$  7.85 – 7.79 (m, 1H), 7.77 (dd,  $J$  = 5.4, 1.3 Hz, 1H), 7.49 (s, 0.67H), 7.40 (s, 0.33H), 7.29 (dt,  $J$  = 8.3, 1.3 Hz, 1H), 6.03 (d,  $J$  = 1.2 Hz, 0.67H), 5.98 (d,  $J$  = 1.3 Hz, 0.33H), 5.52 (d,  $J$  = 1.3 Hz, 0.33H), 5.38 (d,  $J$  = 1.3 Hz, 0.67H), 2.03 (ddt,  $J$  = 12.4, 9.5, 3.0 Hz, 1H), 1.84 –

1.69 (m, 4H), 1.65 – 1.55 (m, 2H), 1.53 – 1.41 (m, 4H), 1.30 – 0.99 (m, 6H), 0.97 – 0.91 (m, 6H).  $^{13}\text{C}$  NMR (126 MHz,  $\text{CDCl}_3$ )  $\delta$  157.98, 157.17, 135.71, 135.55, 129.35, 126.90, 126.35, 122.55, 120.76, 120.55, 120.44, 119.55, 118.43, 116.71, 116.32, 115.04, 104.47, 88.08, 87.59, 78.06, 77.65, 56.05, 55.47, 42.67, 42.45, 42.25, 42.18, 38.32, 38.18, 37.98, 33.87, 33.82, 33.64, 33.54, 28.75, 26.50, 21.64, 20.48, 20.31, 20.11, 19.84, 18.66. HRMS (ESI):  $m/z$  calculated for  $\text{C}_{25}\text{H}_{31}\text{N}_2\text{O}$   $[\text{M}+\text{H}]^+$ : 375.2436, Found  $[\text{M}+\text{H}]^+$ : 375.2431.

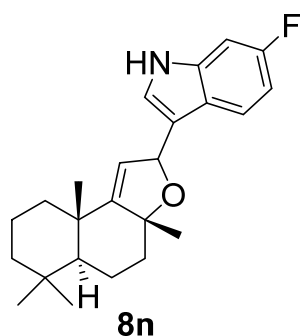

**6-fluoro-3-((3aR,5aS,9aS)-3a,6,6,9a-tetramethyl-2,3a,4,5,5a,6,7,8,9,9a-decahydronaphtho[2,1-b]furan-2-yl)-1H-indole (8n):** Method A: **4** (50 mg, 0.20 mmol), 6-fluoroindole (21.6 mg, 0.16 mmol),  $\text{TiCl}_4$  (0.16 mL, 0.16 mmol) and  $\text{CH}_2\text{Cl}_2$  (10 mL) were used to afford the desired product **8n** as yellow oil (45.4 mg, 77% yield, Isomer ratio: 70:30).  $^1\text{H}$  NMR (500 MHz, Methanol- $d_4$ )  $\delta$  7.62 (ddd,  $J$  = 8.6, 5.4, 3.0 Hz, 1H), 7.21 (s, 0.7H), 7.12 (s, 0.3H), 7.04 (ddd,  $J$  = 10.1, 6.6, 2.3 Hz, 1H), 6.79 (ddt,  $J$  = 9.8, 8.8, 2.4 Hz, 1H), 5.99 (d,  $J$  = 1.2 Hz, 1H), 5.95 (d,  $J$  = 1.3 Hz, 0.3H), 5.50 (d,  $J$  = 1.4 Hz, 0.3H), 5.38 (d,  $J$  = 1.2 Hz, 1H), 2.03 (ddt,  $J$  = 11.7, 5.6, 2.9 Hz, 1H), 1.86 – 1.71 (m, 4H), 1.65 – 1.59 (m, 1H), 1.57 – 1.54 (m, 1H), 1.52–1.44 (m, 4H), 1.35 – 1.18 (m, 5H), 1.18 – 1.02 (m, 1H), 0.97 – 0.90 (m, 6H).  $^{13}\text{C}$  NMR (126 MHz,  $\text{CDCl}_3$ )  $\delta$  157.51, 156.63, 136.97, 136.87, 123.37, 122.80, 120.55, 120.47, 117.58, 117.19, 115.53, 108.45, 108.26, 97.75, 97.55, 87.78, 87.27, 78.52, 78.07, 56.09, 55.39, 42.76, 42.42, 42.30, 42.22, 38.27, 38.18, 37.93, 33.87, 33.82, 33.66, 33.57, 28.73, 26.55, 21.66, 21.60, 20.53, 20.35, 20.16, 19.85, 18.76, 18.70. HRMS (ESI):  $m/z$  calculated for  $\text{C}_{24}\text{H}_{31}\text{FNO}$   $[\text{M}+\text{H}]^+$ : 368.2390, Found  $[\text{M}+\text{H}]^+$ : 368.2387.

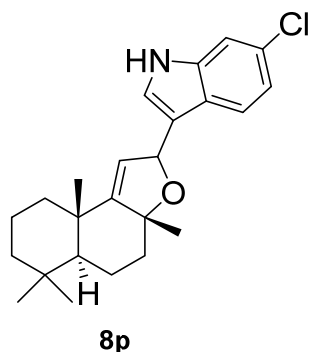

**6-chloro-3-((3aR,5aS,9aS)-3a,6,6,9a-tetramethyl-2,3a,4,5,5a,6,7,8,9,9a-decahydronaphtho[2,1-b]furan-2-yl)-1H-indole (8p):** Method A: **4** (50 mg, 0.20 mmol), 6-chloroindole (24.2 mg, 0.16 mmol),  $\text{TiCl}_4$  (0.16 mL, 0.16 mmol) and  $\text{CH}_2\text{Cl}_2$  (10 mL) were used to afford the desired product **8p** as yellow oil (46.9 mg, 76% yield, Isomer ratio: 70:30).  $^1\text{H}$  NMR (500 MHz, Methanol- $d_4$ )  $\delta$  7.62 (dd,  $J$  = 8.5, 4.0 Hz, 1H), 7.35 (dd,  $J$  = 6.2, 1.9 Hz, 1H), 7.24 (s, 0.7H), 7.15 (s, 0.3H), 6.99

(ddd,  $J = 8.5, 4.4, 1.9$  Hz, 1H), 5.99 (d,  $J = 1.2$  Hz, 0.7H), 5.95 (d,  $J = 1.2$  Hz, 0.3H), 5.50 (d,  $J = 1.4$  Hz, 0.3H), 5.38 (d,  $J = 1.2$  Hz, 0.7H), 2.03 (ddt,  $J = 12.1, 5.9, 2.9$  Hz, 1H), 1.87 – 1.70 (m, 4H), 1.65 – 1.58 (m, 1H), 1.57 – 1.54 (m, 1H), 1.52–1.43 (m, 4H), 1.34 – 1.18 (m, 5H), 1.17 – 1.02 (m, 1H), 0.97 – 0.90 (m, 6H).  $^{13}\text{C}$  NMR (126 MHz,  $\text{CDCl}_3$ )  $\delta$  157.50, 156.65, 137.32, 137.14, 128.00, 124.76, 123.84, 123.32, 120.60, 120.50, 120.29, 118.53, 117.45, 117.12, 115.45, 111.37, 111.28, 87.84, 87.35, 78.46, 78.01, 56.07, 55.36, 42.74, 42.37, 42.29, 42.21, 38.27, 38.17, 37.94, 33.86, 33.81, 33.65, 33.56, 28.69, 26.58, 21.65, 21.60, 20.52, 20.33, 20.14, 19.83, 18.75, 18.69. HRMS (ESI):  $m/z$  calculated for  $\text{C}_{24}\text{H}_{31}^{35}\text{ClNO}$   $[\text{M}+\text{H}]^+$ : 384.2094,  $\text{C}_{24}\text{H}_{31}^{37}\text{ClNO}$   $[\text{M}+\text{H}]^+$ : 386.2065, Found  $[\text{M}+\text{H}]^+$ : 384.2090, 386.2075.

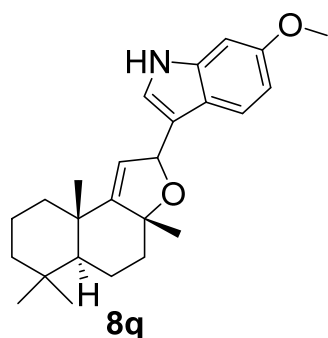

**6-methoxy-3-((3aR,5aS,9aS)-3a,6,6,9a-tetramethyl-2,3a,4,5,5a,6,7,8,9,9a-decahydronaphtho[2,1-b]furan-2-yl)-1H-indole (8q):** Method A: **4** (50 mg, 0.20 mmol), 6-methoxyindole (23.5 mg, 0.16 mmol),  $\text{TiCl}_4$  (0.16 mL, 0.16 mmol) and  $\text{CH}_2\text{Cl}_2$  (10 mL) were used to afford the desired product **8q** as white solid (32.3 mg, 53% yield, Isomer ratio: 59:41).  $^1\text{H}$  NMR (500 MHz, Methanol- $d_4$ )  $\delta$  7.33 (dd,  $J = 8.6, 5.9$  Hz, 1H), 6.91 (dd,  $J = 11.5, 2.3$  Hz, 1H), 6.64 (dt,  $J = 8.6, 2.3$  Hz, 1H), 6.28 (d,  $J = 0.8$  Hz, 0.59H), 6.21 (d,  $J = 0.8$  Hz, 0.41H), 5.83 (d,  $J = 1.3$  Hz, 0.59H), 5.74 (d,  $J = 1.3$  Hz, 0.41H), 5.42 (d,  $J = 1.4$  Hz, 0.41H), 5.29 (d,  $J = 1.3$  Hz, 0.59H), 3.80 (d,  $J = 1.7$  Hz, 3H), 2.07 – 2.00 (m, 1H), 1.84 – 1.72 (m, 4H), 1.59 – 1.45 (m, 6H), 1.32 – 0.99 (m, 6H), 0.97 – 0.90 (m, 6H).  $^{13}\text{C}$  NMR (126 MHz,  $\text{CDCl}_3$ )  $\delta$  158.48, 158.06, 156.37, 139.03, 138.36, 136.87, 122.87, 121.22, 121.20, 115.94, 114.24, 109.78, 109.72, 99.62, 99.42, 94.68, 88.32, 88.03, 78.89, 78.65, 55.92, 55.80, 55.61, 43.50, 42.52, 42.23, 42.09, 38.29, 38.12, 38.00, 33.85, 33.51, 29.19, 26.62, 21.64, 21.58, 20.43, 20.33, 19.96, 19.86, 18.71, 18.65. HRMS (ESI):  $m/z$  calculated for  $\text{C}_{25}\text{H}_{34}\text{NO}_2$   $[\text{M}+\text{H}]^+$ : 380.2590, Found  $[\text{M}+\text{H}]^+$ : 380.2588.

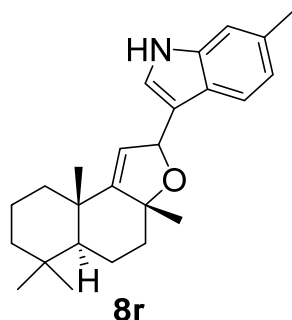

**6-methyl-3-((3aR,5aS,9aS)-3a,6,6,9a-tetramethyl-2,3a,4,5,5a,6,7,8,9,9a-decahydronaphtho[2,1-b]furan-2-yl)-1H-indole (8r):** Method A: **4** (50 mg, 0.20 mmol), 6-methyl-1H-indole (21.0 mg,

0.16 mmol),  $\text{TiCl}_4$  (0.16 mL, 0.16 mmol) and  $\text{CH}_2\text{Cl}_2$  (10 mL) were used to afford the desired product **8r** as white solid (39.1 mg, 67% yield, Isomer ratio: 69:31).  $^1\text{H}$  NMR (500 MHz,  $\text{CDCl}_3$ )  $\delta$  8.06 (s, 1H), 7.62 (dd,  $J = 8.3, 1.7$  Hz, 1H), 7.09 – 7.05 (m, 1H), 7.04 (d,  $J = 2.4$  Hz, 0.69H), 6.97 (d,  $J = 2.4$  Hz, 0.31H), 6.94 (ddd,  $J = 8.2, 4.6, 1.5$  Hz, 1H), 6.02 (d,  $J = 1.2$  Hz, 0.69H), 5.99 (d,  $J = 1.3$  Hz, 0.31H), 5.49 (d,  $J = 1.3$  Hz, 0.31H), 5.39 (d,  $J = 1.2$  Hz, 0.69H), 2.44 (s, 3H), 2.08 (dt,  $J = 11.8, 2.8$  Hz, 1H), 1.79 – 1.65 (m, 4H), 1.58 – 1.43 (m, 7H), 1.26 – 1.16 (m, 4H), 1.08 (ddd,  $J = 53.5, 12.3, 2.4$  Hz, 1H), 0.94 – 0.89 (m, 6H).  $^{13}\text{C}$  NMR (126 MHz,  $\text{CDCl}_3$ )  $\delta$  156.97, 156.17, 137.47, 137.26, 131.82, 124.00, 122.43, 121.91, 121.30, 119.48, 119.35, 118.44, 117.52, 117.39, 115.84, 111.33, 111.27, 87.56, 87.13, 78.84, 78.35, 56.06, 55.25, 42.81, 42.39, 42.31, 42.24, 38.21, 38.17, 37.89, 33.85, 33.79, 33.65, 33.56, 28.72, 26.65, 21.79, 21.65, 21.60, 20.54, 20.37, 20.16, 19.83, 18.77, 18.71. HRMS (ESI):  $m/z$  calculated for  $\text{C}_{25}\text{H}_{34}\text{NO}$   $[\text{M}+\text{H}]^+$ : 364.2640, Found  $[\text{M}+\text{H}]^+$ : 364.2636.

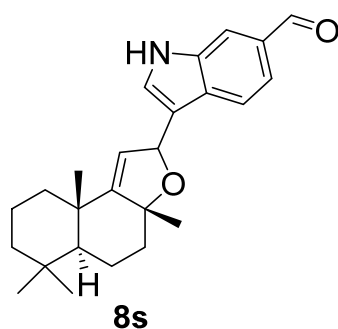

**3-((3aR,5aS,9aS)-3a,6,6,9a-tetramethyl-2,3a,4,5,5a,6,7,8,9,9a-decahydronaphtho[2,1-b]furan-2-yl)-1H-indole-6-carbaldehyde (8s):** Method A: **4** (50 mg, 0.20 mmol), Indole-6-carboxaldehyde (23.20 mg, 0.16 mmol),  $\text{TiCl}_4$  (0.16 mL, 0.16 mmol) and  $\text{CH}_2\text{Cl}_2$  (10 mL) were used to afford the desired product **8s** as yellow oil (46.3 mg, 77% yield, Isomer ratio: 70:30).  $^1\text{H}$  NMR (500 MHz,  $\text{CDCl}_3$ )  $\delta$  10.03 (s, 1H), 8.51 (s, 1H), 7.92 – 7.82 (m, 2H), 7.64 (ddd,  $J = 8.3, 2.5, 1.4$  Hz, 1H), 7.42 (d,  $J = 2.5$  Hz, 0.7H), 7.36 (d,  $J = 2.5$  Hz, 0.3H), 6.05 (d,  $J = 1.3$  Hz, 0.7H), 6.02 (d,  $J = 1.3$  Hz, 0.3H), 5.48 (d,  $J = 1.3$  Hz, 0.3H), 5.37 (d,  $J = 1.2$  Hz, 0.7H), 2.12 – 2.04 (m, 1H), 1.80 – 1.66 (m, 4H), 1.54 – 1.44 (m, 6H), 1.33 – 1.15 (m, 5H), 1.07 (ddd,  $J = 40.6, 12.3, 2.3$  Hz, 1H), 0.97 – 0.87 (m, 6H).  $^{13}\text{C}$  NMR (126 MHz,  $\text{CDCl}_3$ )  $\delta$  192.83, 157.72, 156.91, 136.48, 136.32, 131.27, 131.21, 131.10, 127.86, 127.34, 120.87, 120.75, 120.02, 119.89, 119.36, 118.28, 116.91, 115.24, 114.55, 114.38, 88.02, 87.55, 78.27, 77.82, 56.05, 55.39, 42.70, 42.42, 42.26, 42.19, 38.31, 38.28, 38.17, 37.97, 33.86, 33.81, 33.64, 33.54, 28.74, 26.59, 21.64, 21.58, 20.50, 20.32, 20.11, 19.82, 18.73, 18.66. HRMS (ESI):  $m/z$  calculated for  $\text{C}_{25}\text{H}_{30}\text{NO}_2$   $[\text{M}-\text{H}]^+$ : 376.2277, Found  $[\text{M}-\text{H}]^+$ : 376.2289.



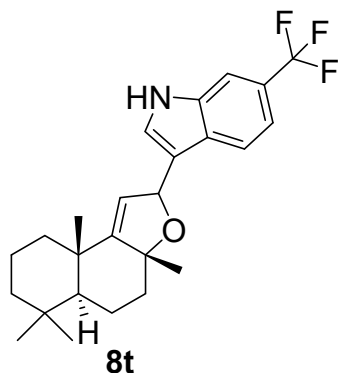

**3-((3aR,5aS,9aS)-3a,6,6,9a-tetramethyl-2,3a,4,5,5a,6,7,8,9,9a-decahydronaphtho[2,1-b]furan-2-yl)-6-(trifluoromethyl)-1H-indole (8t):** Method A: **4** (50 mg, 0.20 mmol), 6-(trifluoromethyl)indole (29.6 mg, 0.16 mmol), TiCl<sub>4</sub> (0.16 mL, 0.16 mmol) and CH<sub>2</sub>Cl<sub>2</sub> (10 mL) were used to afford the desired product **8t** as yellow oil (41.2 mg, 62% yield, Isomer ratio: 73:27). <sup>1</sup>H NMR (500 MHz, CDCl<sub>3</sub>) δ 8.66 (d, *J* = 18.6 Hz, 1H), 7.81 (dd, *J* = 8.3, 3.6 Hz, 1H), 7.57 – 7.49 (m, 1H), 7.33 (td, *J* = 8.4, 1.6 Hz, 1H), 7.16 (d, *J* = 2.5 Hz, 0.73H), 7.03 (d, *J* = 2.5 Hz, 0.27H), 6.03 (d, *J* = 1.2 Hz, 0.73H), 5.99 (d, *J* = 1.3 Hz, 0.27H), 5.46 (d, *J* = 1.2 Hz, 0.27H), 5.37 (d, *J* = 1.2 Hz, 0.73H), 2.11 – 2.05 (m, 1H), 1.80 – 1.65 (m, 4H), 1.61 – 1.41 (m, 7H), 1.27 – 1.15 (m, 4H), 1.08 (ddd, *J* = 43.0, 12.2, 2.3 Hz, 1H), 0.96 – 0.89 (m, 6H). <sup>13</sup>C NMR (126 MHz, CDCl<sub>3</sub>) δ 157.72, 156.83, 135.83, 135.66, 128.52, 128.42, 126.39, 125.78, 125.28, 124.23, 124.06, 120.17, 120.05, 117.71, 117.01, 116.28, 115.34, 108.96, 87.98, 87.47, 78.42, 77.96, 56.10, 55.41, 42.74, 42.37, 42.29, 42.21, 38.33, 38.29, 38.19, 37.98, 33.88, 33.83, 33.65, 33.56, 28.67, 26.55, 21.66, 21.60, 20.53, 20.33, 20.15, 19.81, 18.75, 18.69. HRMS (ESI): *m/z* calculated for C<sub>25</sub>H<sub>31</sub>F<sub>3</sub>NO [M+H]<sup>+</sup>: 418.2358, Found [M+H]<sup>+</sup>: 418.2352.

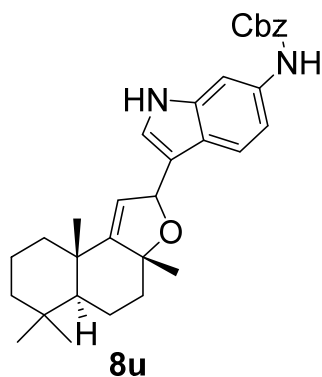

**benzyl 3-((3aR,5aS,9aS)-3a,6,6,9a-tetramethyl-2,3a,4,5,5a,6,7,8,9,9a-decahydronaphtho[2,1-b]furan-2-yl)-1H-indol-6-yl)carbamate (8u):** Method A: **4** (50 mg, 0.20 mmol), benzyl (1H-indol-6-yl)carbamate (29.6 mg, 0.16 mmol), TiCl<sub>4</sub> (0.16 mL, 0.16 mmol) and CH<sub>2</sub>Cl<sub>2</sub> (10 mL) were used to afford the desired product **8u** as yellow oil (62.4 mg, 78% yield, Isomer ratio: 69:31). <sup>1</sup>H NMR (500 MHz, Methanol-*d*<sub>4</sub>) δ 7.67 (s, 1H), 7.57 (d, *J* = 8.5 Hz, 1H), 7.43 (d, *J* = 7.1 Hz, 2H), 7.39 – 7.34 (m, 2H), 7.33 – 7.28 (m, 1H), 7.15 (s, 0.69H), 7.06 (s, 0.31H), 6.93 (dt, *J* = 8.5, 2.5 Hz, 1H), 5.97 (d, *J* = 1.2 Hz, 0.69H), 5.94 (d, *J* = 1.3 Hz, 0.31H), 5.49 (d, *J* = 1.5 Hz, 0.31H), 5.37 (d, *J* = 1.4 Hz, 0.69H), 5.18 (s, 2H), 2.02 (dt, *J* = 11.9, 3.0 Hz, 1H), 1.86 – 1.70 (m, 4H), 1.65 – 1.58 (m, 1H), 1.57 – 1.53 (m, 1H), 1.51–1.44 (m, 4H), 1.33 – 1.01 (m, 6H), 0.98 – 0.89 (m, 6H).

$^{13}\text{C}$  NMR (126 MHz,  $\text{CDCl}_3$ )  $\delta$  157.23, 156.34, 137.22, 137.06, 136.43, 132.61, 128.71, 128.40, 128.37, 123.39, 122.82, 119.99, 119.84, 118.16, 117.36, 117.04, 115.68, 87.65, 87.15, 78.65, 78.18, 66.96, 56.06, 55.28, 42.76, 42.32, 42.29, 42.20, 38.22, 38.15, 37.88, 33.84, 33.78, 33.64, 33.55, 28.65, 26.56, 21.65, 21.58, 20.52, 20.32, 20.15, 19.81, 18.75, 18.68, 2.00. HRMS (ESI):  $m/z$  calculated for  $\text{C}_{32}\text{H}_{39}\text{N}_2\text{O}_3$   $[\text{M}+\text{H}]^+$ : 499.2961, Found  $[\text{M}+\text{H}]^+$ : 499.2958.

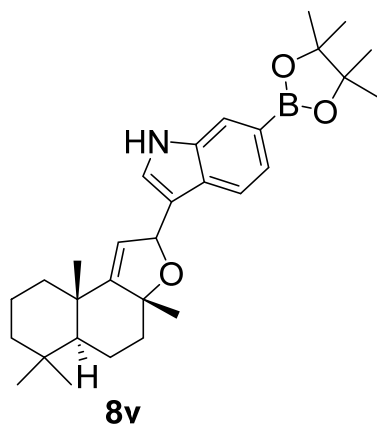

**6-((4,4,5,5-tetramethyl-1,3,2-dioxaborolan-2-yl)-3-((3aR,5aS,9aS)-3a,6,6,9a-tetramethyl-2,3a,4,5,5a,6,7,8,9,9a-decahydronaphtho[2,1-b]furan-2-yl)-1H-indole (8v):** Method A: **4** (50 mg, 0.20 mmol), indole-6-boronic acid pinacol ester (38.8 mg, 0.16 mmol),  $\text{TiCl}_4$  (0.16 mL, 0.16 mmol) and  $\text{CH}_2\text{Cl}_2$  (10 mL) were used to afford the desired product **8v** as yellow oil (62.3 mg, 82% yield, Isomer ratio: 70:30).  $^1\text{H}$  NMR (500 MHz,  $\text{CDCl}_3$ )  $\delta$  8.33 (d,  $J$  = 14.8 Hz, 1H), 7.83 (d,  $J$  = 1.6 Hz, 1H), 7.77 (dd,  $J$  = 8.1, 5.5 Hz, 1H), 7.55 (dd,  $J$  = 8.0, 1.1 Hz, 1H), 7.18 (d,  $J$  = 2.6 Hz, 0.7H), 7.12 (d, 2.5Hz, 0.3H), 6.02 (dd,  $J$  = 4.8, 1.5 Hz, 1H), 5.49 (d,  $J$  = 1.4Hz, 0.3H), 5.38 (d,  $J$  = 1.2 Hz, 1H), 2.06 (dt,  $J$  = 13.9, 3.8 Hz, 1H), 1.83 – 1.67 (m, 4H), 1.66 – 1.55 (m, 1H), 1.53 – 1.44 (m, 5H), 1.37 (d,  $J$  = 1.7 Hz, 12H), 1.27 – 1.01 (m, 6H), 0.96 – 0.87 (m, 6H).  $^{13}\text{C}$  NMR (126 MHz,  $\text{CDCl}_3$ )  $\delta$  157.01, 156.25, 136.79, 136.53, 128.69, 125.40, 125.33, 124.68, 123.98, 119.35, 119.07, 118.91, 118.40, 117.69, 117.46, 115.74, 87.59, 87.21, 83.64, 78.67, 78.23, 56.04, 55.22, 42.81, 42.25, 38.23, 38.18, 37.91, 33.82, 33.77, 33.62, 33.55, 28.66, 26.71, 25.03, 25.00, 21.64, 21.58, 20.52, 20.36, 20.13, 19.76, 18.75, 18.69. HRMS (ESI):  $m/z$  calculated for  $\text{C}_{30}\text{H}_{43}\text{BNO}_3$   $[\text{M}+\text{H}]^+$ : 476.3336, Found  $[\text{M}+\text{H}]^+$ : 376.3335.

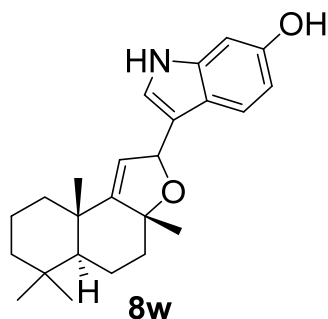

**3-((3aR,5aS,9aS)-3a,6,6,9a-tetramethyl-2,3a,4,5,5a,6,7,8,9,9a-decahydronaphtho[2,1-b]furan-2-yl)-1H-indol-6-ol (8w):** Method A: **4** (50 mg, 0.20 mmol), 6-hydroxyindole (21.3 mg, 0.16 mmol),  $\text{TiCl}_4$  (0.16 mL, 0.16 mmol) and  $\text{CH}_2\text{Cl}_2$  (10 mL) were used to afford the desired product **8w** as yellow oil (28.2mg, 48% yield, Isomer ratio: 73:27).  $^1\text{H}$  NMR (500 MHz, Methanol- $d_4$ )  $\delta$

7.47 (d,  $J = 8.5$  Hz, 1H), 7.03 (s, 0.73H), 6.95 (s, 0.27H), 6.76 (dd,  $J = 5.4, 2.2$  Hz, 1H), 6.58 (ddd,  $J = 8.7, 6.9, 2.2$  Hz, 1H), 5.93 (dd,  $J = 11.2, 1.6$  Hz, 1H), 5.47 (d,  $J = 1.3$  Hz, 0.27H), 5.36 (d,  $J = 1.3$  Hz, 0.73H), 2.03 – 1.98 (m, 1H), 1.84 – 1.71 (m, 4H), 1.63 – 1.44 (m, 7H), 1.29 – 1.01 (m, 5H), 0.97 – 0.90 (m, 6H).  $^{13}\text{C}$  NMR (126 MHz, Methanol- $d_4$ )  $\delta$  157.83, 157.00, 154.15, 139.74, 139.50, 123.48, 122.89, 121.74, 121.41, 120.84, 120.51, 118.84, 117.71, 117.04, 116.65, 110.18, 110.12, 97.78, 97.64, 88.84, 88.38, 80.08, 79.85, 75.82, 57.36, 56.58, 43.85, 43.33, 43.16, 39.37, 39.27, 39.25, 38.96, 34.65, 34.61, 34.01, 33.92, 30.78, 29.03, 26.88, 25.02, 21.93, 21.89, 21.39, 21.23, 20.65, 20.39, 19.65, 19.59. HRMS (ESI):  $m/z$  calculated for  $\text{C}_{24}\text{H}_{32}\text{NO}_2$   $[\text{M}+\text{H}]^+$ : 366.2433, Found  $[\text{M}+\text{H}]^+$ : 366.2433.

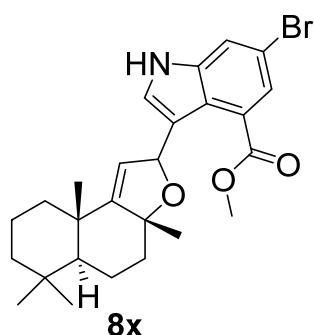

#### methyl

**6-bromo-3-((3aR,5aS,9aS)-3a,6,6,9a-tetramethyl-2,3a,4,5,5a,6,7,8,9,9a-decahydronaphtho[2,1-b]furan-2-yl)-1H-indole-4-carboxylate (8x):** Method A: **4** (50 mg, 0.20 mmol), methyl 6-bromo-1H-indole-4-carboxylate (45.7 mg, 0.16 mmol),  $\text{TiCl}_4$  (0.16 mL, 0.16 mmol) and  $\text{CH}_2\text{Cl}_2$  (10 mL) were used to afford major isomer **8x** (11.2 mg, 14% yield) and minor isomer **8x'** (10.1 mg, 13% yield) both as transparent oil (Isomer ratio: 52:48). **8x**:  $^1\text{H}$  NMR (500 MHz,  $\text{CDCl}_3$ )  $\delta$  7.99 (d,  $J = 1.7$  Hz, 1H), 7.96 (d,  $J = 1.9$  Hz, 1H), 7.32 (d,  $J = 3.3$  Hz, 1H), 7.13 (dd,  $J = 3.2, 0.7$  Hz, 1H), 6.84 (d,  $J = 1.1$  Hz, 1H), 5.34 (d,  $J = 1.1$  Hz, 1H), 3.97 (s, 3H), 2.02 (dt,  $J = 12.3, 3.1$  Hz, 1H), 1.84 – 1.70 (m, 4H), 1.55 – 1.43 (m, 6H), 1.33 – 1.25 (m, 2H), 1.19 – 1.16 (m, 4H), 0.94 (d,  $J = 24.3$  Hz, 6H).  $^{13}\text{C}$  NMR (126 MHz,  $\text{CDCl}_3$ )  $\delta$  166.92, 163.26, 137.64, 128.40, 128.34, 126.32, 122.82, 118.11, 114.33, 112.58, 104.05, 89.33, 89.21, 55.62, 52.12, 42.07, 41.89, 38.64, 38.41, 34.04, 33.50, 27.65, 21.66, 20.34, 19.42, 18.61. HRMS (ESI):  $m/z$  calculated for  $\text{C}_{26}\text{H}_{32}^{35}\text{BrNNaO}_3$   $[\text{M}+\text{Na}]^+$ : 508.1463,  $\text{C}_{26}\text{H}_{32}^{37}\text{BrNNaO}_3$   $[\text{M}+\text{Na}]^+$ : 510.1443, Found  $[\text{M}+\text{Na}]^+$ : 508.1458, 510.1446. Specific Rotation:  $[\alpha]^{20} = -47.72^\circ$  ( $c = 1.0$  g/100 mL, in  $\text{CHCl}_3$ ). **8x'** (mg):  $^1\text{H}$  NMR (500 MHz,  $\text{CDCl}_3$ )  $\delta$  8.01 (d,  $J = 1.8$  Hz, 1H), 7.93 (d,  $J = 1.7$  Hz, 1H), 7.29 (d,  $J = 3.3$  Hz, 1H), 7.09 (d,  $J = 3.3$  Hz, 1H), 6.69 (d,  $J = 1.8$  Hz, 1H), 5.42 (d,  $J = 1.8$  Hz, 1H), 3.96 (s, 3H), 2.11 (dt,  $J = 11.9, 3.1$  Hz, 1H), 1.90 – 1.71 (m, 4H), 1.56–1.52 (m, 1H), 1.49–1.41 (m, 2H), 1.33 (s, 3H), 1.26 – 1.18 (m, 5H), 0.99 (dd,  $J = 12.2, 2.4$  Hz, 1H), 0.91 (d,  $J = 4.5$  Hz, 6H).  $^{13}\text{C}$  NMR (126 MHz,  $\text{CDCl}_3$ )  $\delta$  166.95, 164.05, 138.06, 128.13, 127.57, 126.43, 122.73, 117.84, 114.53, 110.66, 103.54, 88.46, 87.61, 55.76, 52.11, 42.79, 42.07, 38.62, 38.08, 33.94, 33.55, 27.75, 21.64, 20.15, 19.65, 18.62. HRMS (ESI):  $m/z$  calculated for  $\text{C}_{26}\text{H}_{32}^{35}\text{BrNNaO}_3$   $[\text{M}+\text{Na}]^+$ : 508.1463,  $\text{C}_{26}\text{H}_{32}^{37}\text{BrNNaO}_3$   $[\text{M}+\text{Na}]^+$ : 510.1443, Found  $[\text{M}+\text{Na}]^+$ : 508.1463, 510.1456. Specific Rotation:  $[\alpha]^{20} = +92.97^\circ$  ( $c = 1.0$  g/100 mL, in  $\text{CHCl}_3$ ).

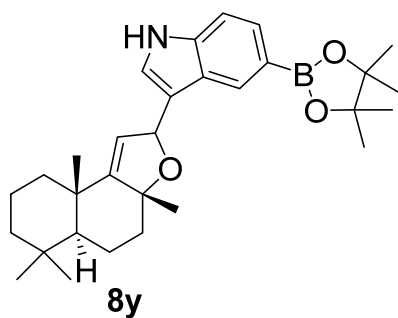

**5-(4,4,5,5-tetramethyl-1,3,2-dioxaborolan-2-yl)-3-((3aR,5aS,9aS)-3a,6,6,9a-tetramethyl-2,3a,4,5,5a,6,7,8,9,9a-decahydronaphtho[2,1-b]furan-2-yl)-1H-indole (8y):** Method A: **4** (50 mg, 0.20 mmol), indole-5-boronic acid pinacol ester (38.8 mg, 0.16 mmol),  $\text{TiCl}_4$  (0.16 mL, 0.16 mmol) and  $\text{CH}_2\text{Cl}_2$  (10 mL) were used to afford the desired product **8y** as yellow oil (64.0 mg, 84% yield, Isomer ratio: 71:29).  $^1\text{H}$  NMR (500 MHz,  $\text{CDCl}_3$ )  $\delta$  8.30 (s, 0.29), 8.23 (s, 0.71H), 8.09 (d,  $J = 11.6$  Hz, 1H), 7.63 (ddd,  $J = 12.4, 8.2, 1.1$  Hz, 1H), 7.33 (dd,  $J = 8.3, 2.3$  Hz, 1H), 7.18 (d,  $J = 2.3$  Hz, 0.71H), 7.12 (d,  $J = 2.2$  Hz, 0.29H), 6.07 (dd,  $J = 14.1, 1.6$  Hz, 1H), 5.50 (d,  $J = 1.4$  Hz, 0.29H), 5.43 (d,  $J = 1.3$  Hz, 0.71H), 2.07 (ddd,  $J = 12.3, 9.4, 3.2$  Hz, 1H), 1.79 – 1.70 (m, 4H), 1.55 – 1.43 (m, 6H), 1.35 (d,  $J = 1.8$  Hz, 12H), 1.31 – 1.24 (m, 2H), 1.22 – 1.01 (m, 4H), 0.96 – 0.88 (m, 6H).  $^{13}\text{C}$  NMR (126 MHz, Methanol- $d_4$ )  $\delta$  158.28, 140.93, 140.59, 128.99, 128.76, 128.59, 128.43, 127.11, 125.63, 124.58, 118.68, 118.42, 117.13, 116.95, 111.85, 111.75, 89.02, 88.42, 84.54, 84.50, 80.06, 79.75, 57.39, 56.31, 43.97, 43.37, 43.31, 43.11, 39.34, 39.26, 38.97, 34.74, 34.67, 34.30, 33.95, 28.72, 26.72, 25.44, 25.30, 25.25, 25.23, 21.99, 21.93, 21.44, 21.19, 20.74, 20.15, 19.69. HRMS (ESI):  $m/z$  calculated for  $\text{C}_{30}\text{H}_{43}\text{BNO}_3$   $[\text{M}+\text{H}]^+$ : 476.3336, Found  $[\text{M}+\text{H}]^+$ : 476.3334.

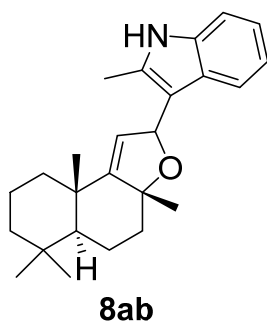

**2-methyl-3-((3aR,5aS,9aS)-3a,6,6,9a-tetramethyl-2,3a,4,5,5a,6,7,8,9,9a-decahydronaphtho[2,1-b]furan-2-yl)-1H-indole (8ab):** Method A: **4** (50 mg, 0.20 mmol), 2-methyl-1H-indole (21.0 mg, 0.16 mmol),  $\text{TiCl}_4$  (0.16 mL, 0.16 mmol) and  $\text{CH}_2\text{Cl}_2$  (10 mL) were used to afford the desired product **8ab** as white solid (50.2 mg, 86% yield, Isomer ratio: 78:22).  $^1\text{H}$  NMR (500 MHz,  $\text{CDCl}_3$ )  $\delta$  8.00 (d,  $J = 17.9$  Hz, 1H), 7.74 – 7.68 (m, 1H), 7.21 – 7.16 (m, 1H), 7.10 – 6.99 (m, 2H), 6.04 (d,  $J = 1.3$  Hz, 0.78H), 6.00 (d,  $J = 1.3$  Hz, 0.22H), 5.46 (d,  $J = 1.3$  Hz, 0.22H), 5.37 (d,  $J = 1.3$  Hz, 1H), 2.34 (d,  $J = 41.4$  Hz, 3H), 2.04 (dt,  $J = 11.7, 2.8$  Hz, 1H), 1.87 – 1.69 (m, 4H), 1.59 – 1.43 (m, 7H), 1.29 – 1.02 (m, 5H), 0.94 (d,  $J = 27.6$  Hz, 6H).  $^{13}\text{C}$  NMR (126 MHz,  $\text{CDCl}_3$ )  $\delta$  157.24, 135.64, 133.64, 127.79, 121.01, 120.94, 119.59, 119.44, 119.29, 117.75, 116.25, 111.11, 110.38, 86.62, 78.18, 77.03, 56.48, 55.04, 42.69, 42.39, 42.31, 41.68, 38.50, 38.29, 38.24, 37.94, 33.90, 33.81, 33.73, 33.57, 27.77, 26.29, 21.69, 21.62, 20.71, 20.33, 19.48, 18.80, 18.73, 11.98, 11.88. HRMS (ESI):  $m/z$  calculated for  $\text{C}_{25}\text{H}_{34}\text{NO}$   $[\text{M}+\text{H}]^+$ : 364.2640, Found  $[\text{M}+\text{H}]^+$ : 364.2626.

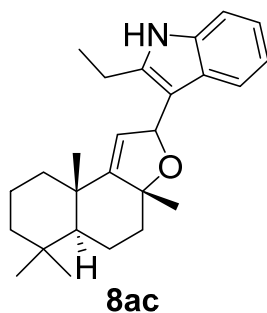

**2-ethyl-3-((3aR,5aS,9aS)-3a,6,6,9a-tetramethyl-2,3a,4,5,5a,6,7,8,9,9a-decahydronaphtho[2,1-b]furan-2-yl)-1H-indole (8ac):** Method A: **4** (50 mg, 0.20 mmol), 2-ethyl-1H-indole (23.2 mg, 0.16 mmol), TiCl<sub>4</sub> (0.16 mL, 0.16 mmol) and CH<sub>2</sub>Cl<sub>2</sub> (10 mL) were used to afford the desired product **8ac** as white solid (43.6 mg, 72% yield, Isomer ratio: 85:15). <sup>1</sup>H NMR (500 MHz, CDCl<sub>3</sub>) δ 7.88 (d, *J* = 11.7 Hz, 1H), 7.72 (dd, *J* = 13.4, 7.9 Hz, 1H), 7.27 (s, 1H), 7.12 – 7.00 (m, 2H), 6.03 (d, *J* = 1.2 Hz, 0.85H), 6.00 (d, *J* = 1.2 Hz, 0.15H), 5.45 (d, *J* = 1.3 Hz, 0.15H), 5.36 (d, *J* = 1.2 Hz, 1H), 2.87 (qd, *J* = 7.5, 2.3 Hz, 2H), 2.09 – 1.99 (m, 1H), 1.88 – 1.68 (m, 4H), 1.56–1.43 (m, 6H), 1.30 (t, *J* = 7.6 Hz, 3H), 1.26 – 1.16 (m, 6H), 0.93 (d, *J* = 28.8 Hz, 6H). <sup>13</sup>C NMR (126 MHz, CDCl<sub>3</sub>) δ 157.28, 139.34, 135.64, 127.81, 121.09, 119.90, 119.71, 119.33, 117.96, 110.47, 86.58, 57.26, 55.04, 43.50, 42.67, 42.32, 41.63, 39.23, 38.54, 38.30, 37.92, 33.81, 33.75, 33.59, 28.42, 26.21, 21.69, 20.74, 20.34, 19.52, 18.74, 14.72. HRMS (ESI): *m/z* calculated for C<sub>26</sub>H<sub>36</sub>NO [M+H]<sup>+</sup>: 378.2797, Found [M+H]<sup>+</sup>: 378.2793.

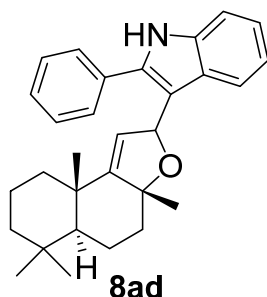

**2-phenyl-3-((3aR,5aS,9aS)-3a,6,6,9a-tetramethyl-2,3a,4,5,5a,6,7,8,9,9a-decahydronaphtho[2,1-b]furan-2-yl)-1H-indole (8ad):** Method A: **4** (50 mg, 0.20 mmol), 2-Phenylindole (30.9 mg, 0.16 mmol), TiCl<sub>4</sub> (0.16 mL, 0.16 mmol) and CH<sub>2</sub>Cl<sub>2</sub> (10 mL) were used to afford the desired product **8ad** as white solid (56.0 mg, 82% yield, Isomer ratio: 82:18). <sup>1</sup>H NMR (500 MHz, CDCl<sub>3</sub>) δ 8.32 – 8.18 (m, 1H), 7.90 (dd, *J* = 13.6, 8.0 Hz, 1H), 7.66 – 7.57 (m, 2H), 7.46 – 7.35 (m, 3H), 7.32 (d, *J* = 7.8 Hz, 1H), 7.22 – 7.07 (m, 2H), 6.06 (d, *J* = 1.3 Hz, 0.82H), 5.95 (d, *J* = 1.3 Hz, 0.18H), 5.45 (d, *J* = 1.2 Hz, 0.18H), 5.42 (s, 0.82H), 2.10 – 2.03 (m, 1H), 1.88 (td, *J* = 12.9, 4.3 Hz, 1H), 1.81 (ddd, *J* = 14.2, 9.2, 2.7 Hz, 1H), 1.71 (dd, *J* = 14.5, 3.5 Hz, 2H), 1.58 – 1.44 (m, 6H), 1.32 – 1.10 (m, 5H), 1.02 – 0.88 (m, 6H). <sup>13</sup>C NMR (126 MHz, CDCl<sub>3</sub>) δ 157.26, 155.49, 137.53, 136.38, 132.58, 129.13, 128.98, 128.77, 128.12, 128.07, 122.26, 122.17, 121.03, 120.85, 119.79, 117.81, 116.43, 112.13, 111.06, 87.76, 86.68, 78.46, 56.50, 54.91, 42.66, 42.38, 42.30, 41.65, 38.53, 38.21, 37.93, 33.88, 33.81, 33.75, 33.55, 27.75, 26.13, 21.69, 21.61, 20.74, 20.34, 20.31, 19.45, 18.78, 18.71. HRMS (ESI): *m/z* calculated for C<sub>30</sub>H<sub>36</sub>NO [M+H]<sup>+</sup>: 426.2797, Found [M+H]<sup>+</sup>: 426.2794.

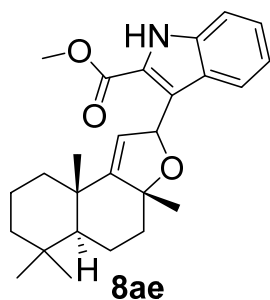

**methyl 3-((3aR,5aS,9aS)-3a,6,6,9a-tetramethyl-2,3a,4,5,5a,6,7,8,9,9a-decahydronaphtho[2,1-b]furan-2-yl)-1H-indole-2-carboxylate (8ae):** Method A: **4** (50 mg, 0.20 mmol), methyl indole-2-carboxylate (28.0 mg, 0.16 mmol), TiCl<sub>4</sub> (0.16 mL, 0.16 mmol) and CH<sub>2</sub>Cl<sub>2</sub> (10 mL) were used to afford the desired product **8ae** as yellow oil (41.2 mg, 63% yield, Isomer ratio: 67:33). <sup>1</sup>H NMR (500 MHz, CDCl<sub>3</sub>) δ 9.74 (d, *J* = 9.1 Hz, 1H), 7.98 (t, *J* = 8.2 Hz, 1H), 7.88 (dd, *J* = 7.6, 1.1 Hz, 1H), 7.29 (d, *J* = 2.4 Hz, 0.67H), 7.23 (d, *J* = 2.5 Hz, 0.33H), 7.18 – 7.12 (m, 1H), 6.06 (d, *J* = 1.3 Hz, 0.67H), 6.03 (d, *J* = 1.3 Hz, 0.33H), 5.49 (d, *J* = 1.3 Hz, 0.33H), 5.38 (d, *J* = 1.3 Hz, 1H), 3.97 (d, *J* = 1.3 Hz, 3H), 2.15 – 2.03 (m, 1H), 1.82 – 1.69 (m, 4H), 1.64 (ddd, *J* = 24.3, 12.4, 3.2 Hz, 1H), 1.54 – 1.43 (m, 6H), 1.33 – 1.14 (m, 5H), 1.07 (ddd, *J* = 43.5, 12.2, 2.3 Hz, 1H), 0.95 – 0.87 (m, 6H). <sup>13</sup>C NMR (126 MHz, CDCl<sub>3</sub>) δ 168.03, 157.55, 156.85, 136.86, 136.65, 127.65, 127.47, 125.61, 125.47, 124.49, 123.98, 123.36, 119.08, 118.96, 118.93, 117.91, 117.18, 115.46, 112.60, 112.55, 87.71, 87.26, 78.27, 77.91, 56.03, 55.41, 51.98, 42.75, 42.49, 42.28, 42.21, 38.27, 38.24, 38.18, 37.92, 33.85, 33.81, 33.64, 33.56, 28.80, 26.51, 21.65, 21.59, 20.50, 20.36, 20.13, 19.88, 18.75, 18.69. HRMS (ESI): *m/z* calculated for C<sub>26</sub>H<sub>34</sub>NO<sub>3</sub> [M+H]<sup>+</sup>: 408.2539, Found [M+H]<sup>+</sup>: 3408.2533.

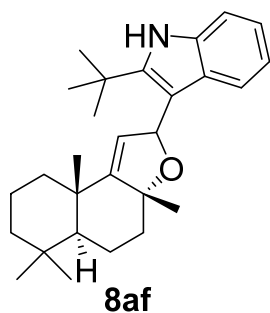

**2-(tert-butyl)-3-((3aR,5aS,9aS)-3a,6,6,9a-tetramethyl-2,3a,4,5,5a,6,7,8,9,9a-decahydronaphtho[2,1-b]furan-2-yl)-1H-indole (8af):** Method A: **4** (50 mg, 0.20 mmol), 2-(tert-butyl)indole (27.7 mg, 0.16 mmol), TiCl<sub>4</sub> (0.16 mL, 0.16 mmol) and CH<sub>2</sub>Cl<sub>2</sub> (10 mL) were used to afford the desired product **8af** as white solid (22.6 mg, 35% yield, Isomer ratio: 87:13). <sup>1</sup>H NMR (500 MHz, Methanol-*d*<sub>4</sub>) δ 10.12 (s, 1H), 7.77 – 7.66 (m, 1H), 7.31 (d, *J* = 8.0 Hz, 1H), 7.00 (ddd, *J* = 8.2, 7.0, 1.2 Hz, 1H), 6.90 (ddd, *J* = 8.1, 6.9, 1.1 Hz, 1H), 6.42 (d, *J* = 1.3 Hz, 0.87H), 6.36 (d, *J* = 1.3 Hz, 0.13H), 5.45 (d, *J* = 1.4 Hz, 0.13H), 5.41 (d, *J* = 1.3 Hz, 0.87H), 2.00 (dt, *J* = 11.4, 2.5 Hz, 1H), 1.89 – 1.74 (m, 4H), 1.70 – 1.52 (m, 6H), 1.50 (s, 9H), 1.33 – 1.02 (m, 6H), 1.01 – 0.91 (m, 6H). <sup>13</sup>C NMR (126 MHz, Methanol-*d*<sub>4</sub>) δ 157.57, 146.81, 136.71, 129.68, 121.52, 121.09, 119.57, 119.45, 111.99, 109.32, 87.68, 79.14, 56.12, 43.42, 42.21, 39.35, 39.01, 34.63, 34.08, 31.77, 26.27,

21.96, 21.19, 20.86, 19.60. HRMS (ESI):  $m/z$  calculated for  $C_{28}H_{40}NO$   $[M+H]^+$ : 406.3110, Found  $[M+H]^+$ : 406.3108.

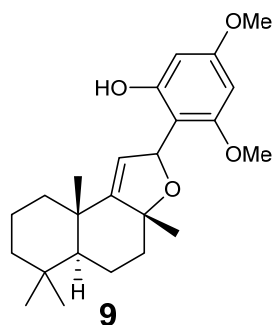

**3,5-dimethoxy-2-((3aR,5aS,9aS)-3a,6,6,9a-tetramethyl-2,3a,4,5,5a,6,7,8,9,9a-decahydronaphtho[2,1-b]furan-2-yl)phenol (9):** Method A: **4** (50 mg, 0.20 mmol), 3,5-dimethoxyphenol (24.7 mg, 0.16 mmol),  $TiCl_4$  (0.16 mL, 0.16 mmol) and  $CH_2Cl_2$  (10 mL) were used to afford the desired product **9** as transparent oil (49.8 mg, 81% yield, Isomer ratio: 87:13).  $^1H$  NMR (500 MHz,  $CDCl_3$ )  $\delta$  9.96 (s, 0.13H), 9.86 (s, 0.87H), 6.14 (d,  $J$  = 1.3 Hz, 0.87H), 6.05 (d,  $J$  = 1.3 Hz, 0.13H), 6.03 – 5.98 (m, 2H), 5.53 (d,  $J$  = 1.3 Hz, 0.13H), 5.30 (d,  $J$  = 1.3 Hz, 0.87H), 3.76 (d,  $J$  = 6.7 Hz, 6H), 2.21 – 2.02 (m, 1H), 1.79 – 1.60 (m, 4H), 1.59 – 1.34 (m, 7H), 1.29 – 0.92 (m, 5H), 0.88 – 0.78 (m, 6H).  $^{13}C$  NMR (126 MHz,  $CDCl_3$ )  $\delta$  160.51, 157.75, 157.70, 155.82, 117.49, 116.51, 104.59, 94.17, 90.53, 88.70, 83.18, 81.52, 56.44, 55.56, 55.51, 55.34, 54.61, 42.29, 41.92, 41.49, 38.45, 37.87, 37.77, 37.74, 33.86, 33.68, 33.48, 33.32, 27.74, 25.63, 21.60, 21.47, 20.50, 20.12, 19.26, 18.58. HRMS (ESI):  $m/z$  calculated for  $C_{24}H_{35}O_4$   $[M+H]^+$ : 387.2535, Found  $[M+H]^+$ : 387.2528.

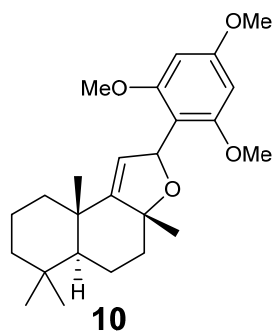

**(3aR,5aS,9aS)-3a,6,6,9a-tetramethyl-2-(2,4,6-trimethoxyphenyl)-2,3a,4,5,5a,6,7,8,9,9a-decahydronaphtho[2,1-b]furan (10):** Method A: **4** (50 mg, 0.20 mmol), 1,3,5-trimethoxybenzene (26.9 mg, 0.16 mmol),  $TiCl_4$  (0.16 mL, 0.16 mmol) and  $CH_2Cl_2$  (10 mL) were used to afford the desired product **10** as transparent oil (39.6 mg, 62% yield, Isomer ratio: 80:20).  $^1H$  NMR (500 MHz, Methanol- $d_4$ )  $\delta$  6.28 – 6.13 (m, 3H), 5.20 (d,  $J$  = 1.5 Hz, 0.2H), 5.15 (d,  $J$  = 1.4 Hz, 0.8H), 3.79 (d,  $J$  = 1.6 Hz, 3H), 3.75 (d,  $J$  = 11.0 Hz, 6H), 1.95 – 1.83 (m, 2H), 1.82 – 1.68 (m, 3H), 1.57 – 1.48 (m, 3H), 1.45 (s, 3H), 1.41 – 1.21 (m, 2H), 1.19 – 0.96 (m, 4H), 0.96 – 0.87 (m, 6H).  $^{13}C$  NMR (126 MHz,  $CDCl_3$ )  $\delta$  161.07, 161.02, 160.49, 160.43, 153.97, 152.60, 117.63, 116.41, 109.96, 109.78, 91.03, 90.95, 87.76, 87.11, 76.03, 75.31, 56.25, 55.64, 55.47, 55.39, 55.36, 55.24, 42.64, 42.58, 42.43, 40.97, 38.37, 38.21, 38.02, 37.72, 33.91, 33.78, 33.70, 33.52, 26.92, 21.53, 20.76,

20.44, 20.01, 19.85, 18.82, 18.77, 0.11. HRMS (ESI):  $m/z$  calculated for  $C_{25}H_{37}O_4$   $[M+H]^+$ : 401.2692, Found  $[M+H]^+$ : 401.2685.

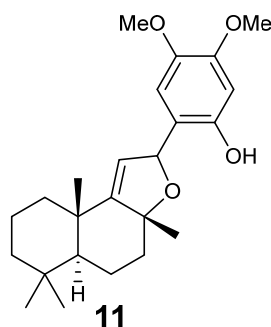

**4,5-dimethoxy-2-((3aR,5aS,9aS)-3a,6,6,9a-tetramethyl-2,3a,4,5,5a,6,7,8,9,9a-decahydronaphtho[2,1-b]furan-2-yl)phenol (11):** Method A: **4** (50 mg, 0.20 mmol), 3, 4-dimethoxyphenol (24.7 mg, 0.16 mmol),  $TiCl_4$  (0.16 mL, 0.16 mmol) and  $CH_2Cl_2$  (10 mL) were used to afford the desired product **11** as transparent oil (46.9 mg, 76% yield, Isomer ratio: 77:23).  $^1H$  NMR (500 MHz, Methanol- $d_4$ )  $\delta$  6.87 (s, 0.23H), 6.82 (s, 0.77H), 6.44 (d,  $J$  = 1.7 Hz, 1H), 6.02 (d,  $J$  = 1.3 Hz, 0.77H), 5.94 (d,  $J$  = 1.3Hz, 0.23H), 5.41 (d,  $J$  = 1.3Hz, 0.23H), 5.25 (d,  $J$  = 1.3 Hz, 0.77H), 3.79 – 3.72 (m, 6H), 2.15 – 2.02 (m, 1H), 1.81–1.66 (m, 4H), 1.62 – 1.55 (m, 1H), 1.55 – 1.49 (m, 4H), 1.44 (td,  $J$  = 13.5, 4.0 Hz, 2H), 1.30 – 1.15 (m, 4H), 1.02 (ddd,  $J$  = 12.1, 5.4, 2.5 Hz, 1H), 0.90 (s, 6H).  $^{13}C$  NMR (126 MHz,  $CDCl_3$ )  $\delta$  157.57, 150.08, 149.71, 149.49, 142.27, 142.15, 117.16, 114.88, 114.69, 111.01, 101.64, 101.53, 89.56, 88.86, 84.76, 83.42, 57.03, 56.85, 55.95, 55.72, 54.82, 42.16, 42.09, 42.04, 41.87, 38.23, 38.04, 37.88, 33.83, 33.73, 33.51, 33.34, 27.85, 25.61, 21.62, 21.54, 20.23, 20.12, 20.09, 19.70, 18.65, 18.57. HRMS (ESI):  $m/z$  calculated for  $C_{24}H_{35}O_4$   $[M+H]^+$ : 387.2535, Found  $[M+H]^+$ : 387.2534.

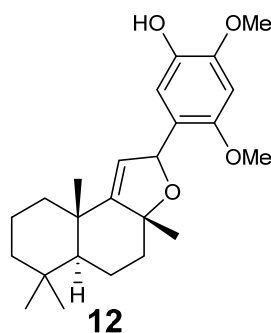

**2,4-dimethoxy-6-((3aR,5aS,9aS)-3a,6,6,9a-tetramethyl-2,3a,4,5,5a,6,7,8,9,9a-decahydronaphtho[2,1-b]furan-2-yl)phenol (12):** Method A: **4** (50 mg, 0.20 mmol), 2, 4-dimethoxyphenol (24.7 mg, 0.16 mmol),  $TiCl_4$  (0.16 mL, 0.16 mmol) and  $CH_2Cl_2$  (10 mL) were used to afford the desired product **12** as transparent oil (49.0 mg, 79% yield, Isomer ratio: 70:30).  $^1H$  NMR (500 MHz, Methanol- $d_4$ )  $\delta$  6.84 (s, 0.3H), 6.82 (d,  $J$  = 15.2 Hz, 1H), 6.60 (d,  $J$  = 1.3 Hz, 1H), 6.01 (d,  $J$  = 1.3 Hz, 0.7H), 5.91 (d,  $J$  = 1.3Hz, 0.3H), 5.31 (d, 1.2Hz, 0.3H), 5.16 (d,  $J$  = 1.2 Hz, 0.7H), 3.89 – 3.76 (m, 6H), 2.11 – 1.99 (m, 1H), 1.82 – 1.67 (m, 4H), 1.59 – 1.40 (m, 7H), 1.30 – 1.13 (m, 4H), 1.02 (ddd,  $J$  = 25.7, 11.9, 2.3 Hz, 1H), 0.90 (d,  $J$  = 3.6 Hz, 6H).  $^{13}C$  NMR (100 MHz,  $CDCl_3$ ): HRMS (ESI):  $m/z$  calculated for  $C_{24}H_{35}O_4$   $[M+H]^+$ : 387.2535, Found  $[M+H]^+$ : 387.2534.



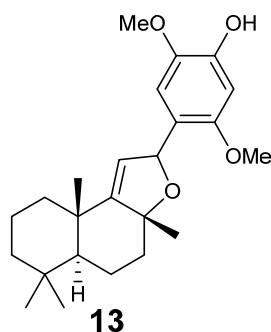

**2,5-dimethoxy-4-((3aR,5aS,9aS)-3a,6,6,9a-tetramethyl-2,3a,4,5,5a,6,7,8,9,9a-decahydronaphtho[2,1-b]furan-2-yl)phenol (13):** Method A: **4** (50 mg, 0.20 mmol), 2, 5-dimethoxyphenol (24.7 mg, 0.16 mmol),  $\text{TiCl}_4$  (0.16 mL, 0.16 mmol) and  $\text{CH}_2\text{Cl}_2$  (10 mL) were used to afford the desired product **13** as transparent oil (51.2 mg, 83% yield, Isomer ratio: 66:34).  $^1\text{H}$  NMR (500 MHz, Methanol- $d_4$ )  $\delta$  6.92 (s, 0.34H), 6.88 (s, 0.66H), 6.49 (d,  $J = 2.8$  Hz, 1H), 5.99 (s, -0.66H), 5.91 (d,  $J = 1.3$  Hz, 0.34H), 5.34 (d,  $J = 1.3$  Hz, 0.34H), 5.20 (s, 0.66H), 3.82 – 3.72 (m, 6H), 2.14 – 2.02 (m, 1H), 1.81–1.66 (m, 4H), 1.59 – 1.49 (m, 5H), 1.47 – 1.40 (m, 2H), 1.29–1.16 (m, 5H), 1.02–0.99 (m, 1H), 0.90 (s, 6H).  $^{13}\text{C}$  NMR (126 MHz,  $\text{CDCl}_3$ )  $\delta$  155.83, 155.15, 150.85, 150.80, 145.24, 145.18, 140.50, 140.26, 122.81, 122.55, 117.67, 116.31, 110.18, 110.05, 99.10, 99.03, 87.88, 87.50, 80.08, 78.92, 56.76, 56.66, 56.09, 56.04, 56.00, 55.38, 43.25, 42.71, 42.27, 42.11, 38.10, 38.02, 38.00, 37.74, 33.79, 33.71, 33.52, 33.50, 29.19, 26.90, 21.56, 21.53, 20.55, 20.37, 19.98, 19.70, 18.70, 18.63. HRMS (ESI):  $m/z$  calculated for  $\text{C}_{24}\text{H}_{35}\text{O}_4$   $[\text{M}+\text{H}]^+$ : 387.2535, Found  $[\text{M}+\text{H}]^+$ : 387.2528.

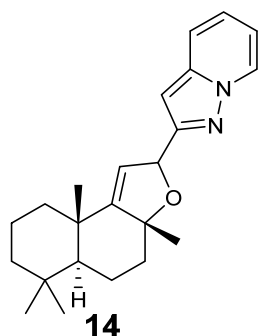

**2-((3aR,5aS,9aS)-3a,6,6,9a-tetramethyl-2,3a,4,5,5a,6,7,8,9,9a-decahydronaphtho[2,1-b]furan-2-yl)pyrazolo[1,5-a]pyridine (14):** Method A: **4** (50 mg, 0.20 mmol), pyrazolo[1,5-a]pyridine (18.9 mg, 0.16 mmol),  $\text{TiCl}_4$  (0.16 mL, 0.16 mmol) and  $\text{CH}_2\text{Cl}_2$  (10 mL) were used to afford the desired product **14** as transparent oil (46.0 mg, 82% yield, Isomer ratio: 66:34).  $^1\text{H}$  NMR (500 MHz,  $\text{CDCl}_3$ )  $\delta$  8.44 (ddt,  $J = 7.1, 2.0, 1.1$  Hz, 1H), 7.90 (s, 0.66H), 7.85 (s, 0.34H), 7.67 – 7.59 (m, 1H), 7.09 (ddt,  $J = 9.1, 6.7, 1.3$  Hz, 1H), 6.74 (td,  $J = 6.9, 1.4$  Hz, 1H), 6.04 (d,  $J = 1.3$  Hz, 0.66H), 5.97 (d,  $J = 1.3$  Hz, 0.34H), 5.41 (d,  $J = 1.3$  Hz, 0.34H), 5.30 (d,  $J = 1.3$  Hz, 0.66H), 2.06 (ddt,  $J = 15.7, 12.0, 3.2$  Hz, 1H), 1.80–1.70 (m, 3H), 1.69 – 1.60 (m, 1H), 1.60 – 1.53 (m, 1H), 1.52 – 1.41 (m, 5H), 1.36 – 1.12 (m, 5H), 1.04 (ddd,  $J = 34.0, 12.2, 2.4$  Hz, 1H), 0.95 – 0.87 (m, 6H).  $^{13}\text{C}$  NMR (126 MHz,  $\text{CDCl}_3$ )  $\delta$  158.17, 157.40, 141.22, 140.93, 138.24, 128.93, 128.84, 123.11,

117.48, 117.44, 116.63, 115.02, 113.36, 112.60, 111.88, 87.77, 87.50, 76.49, 76.15, 55.97, 55.70, 42.75, 42.71, 42.26, 42.19, 38.34, 38.25, 38.19, 37.98, 33.85, 33.62, 33.56, 28.86, 26.52, 21.66, 21.60, 20.45, 20.35, 20.06, 19.97, 18.74, 18.70. HRMS (ESI):  $m/z$  calculated for  $C_{23}H_{31}N_2O$   $[M+H]^+$ : 351.2436, Found  $[M+H]^+$ : 351.2433.

### 3. $^1\text{H}$ NMR and $^{13}\text{C}$ NMR spectrum of intermediates and final compounds

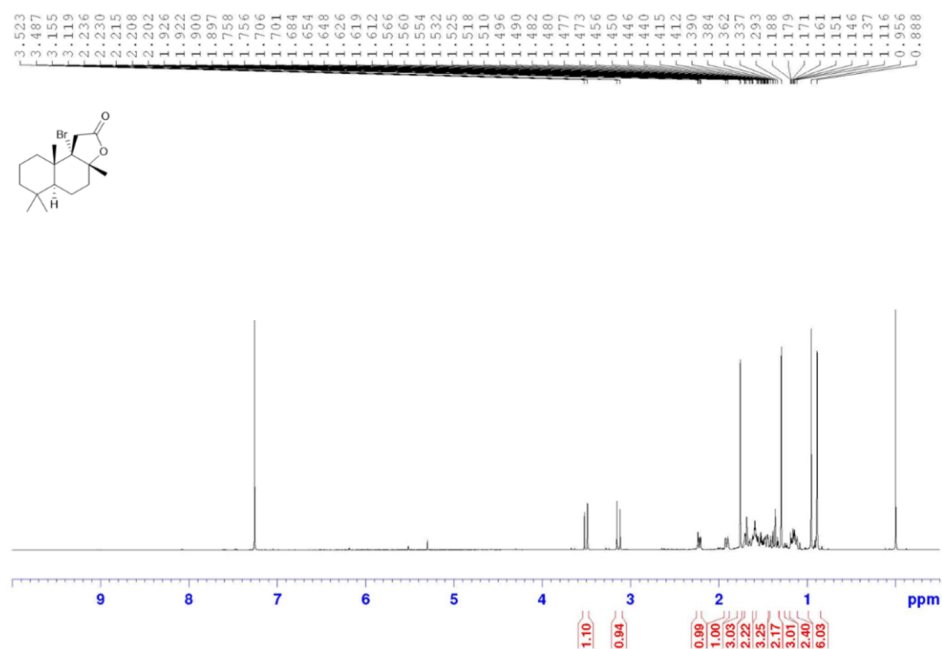

$^1\text{H}$  NMR of Compound 2

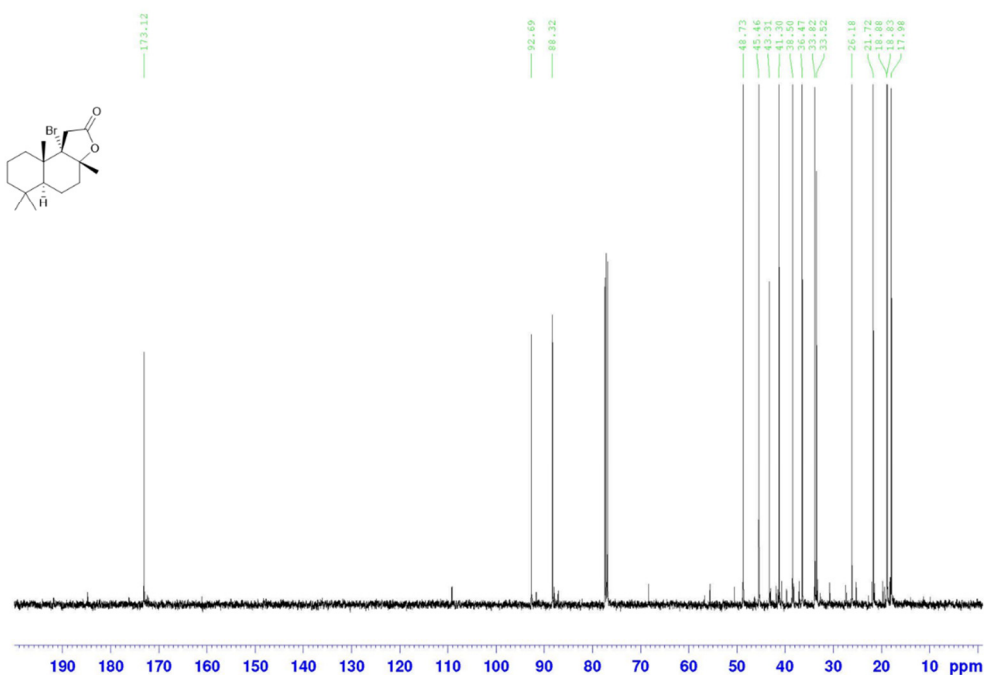

$^{13}\text{C}$  NMR of Compound 2

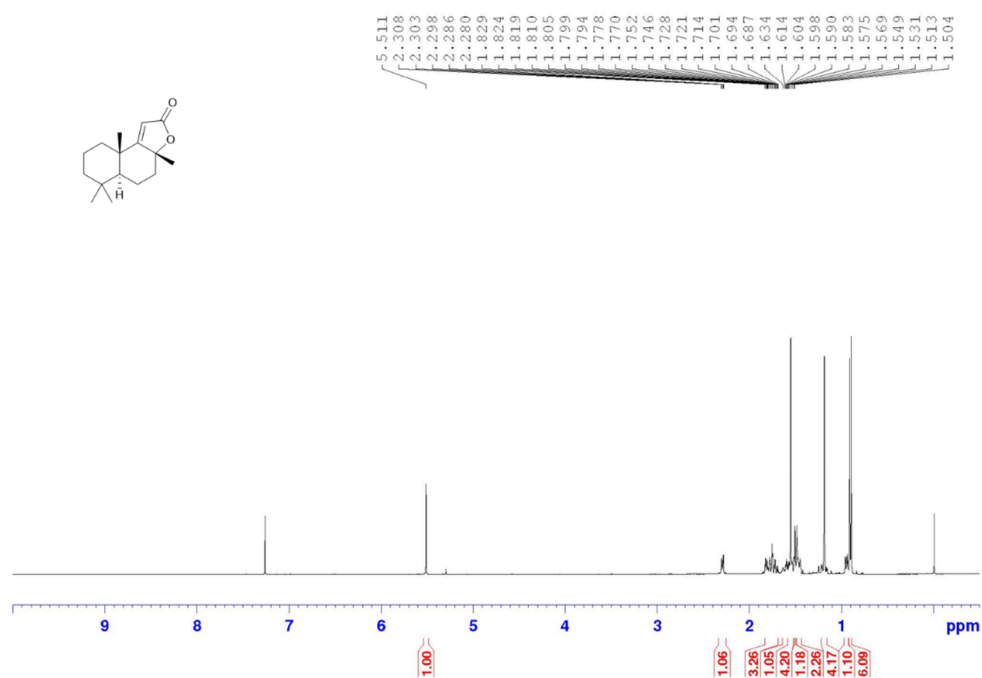

**<sup>1</sup>H NMR of Compound 3**

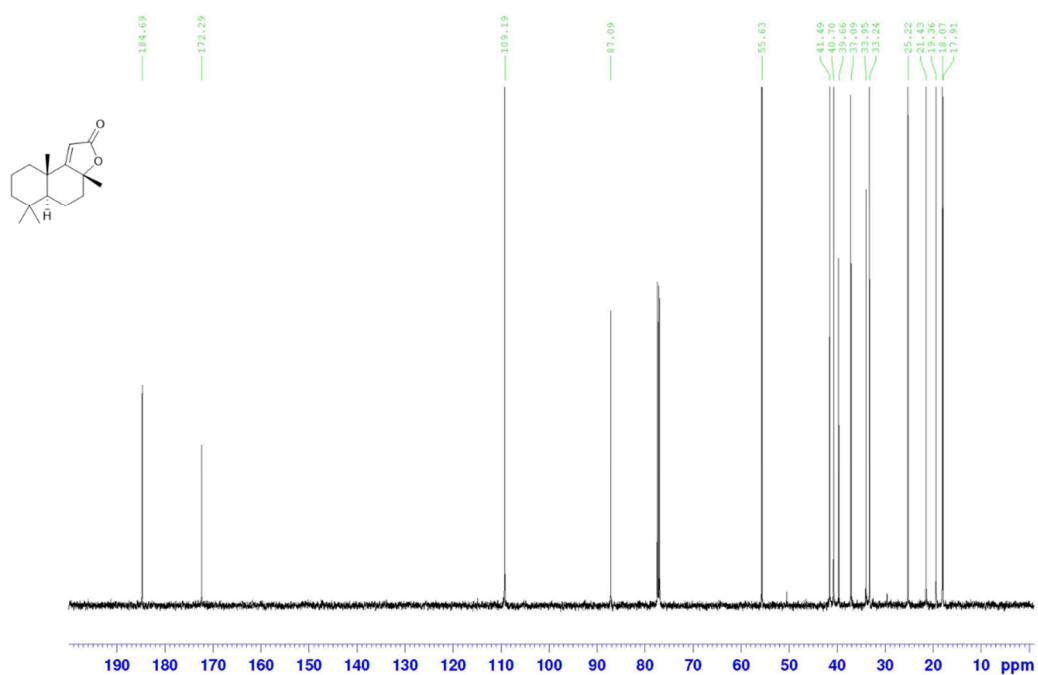

**<sup>13</sup>C NMR of Compound 3**

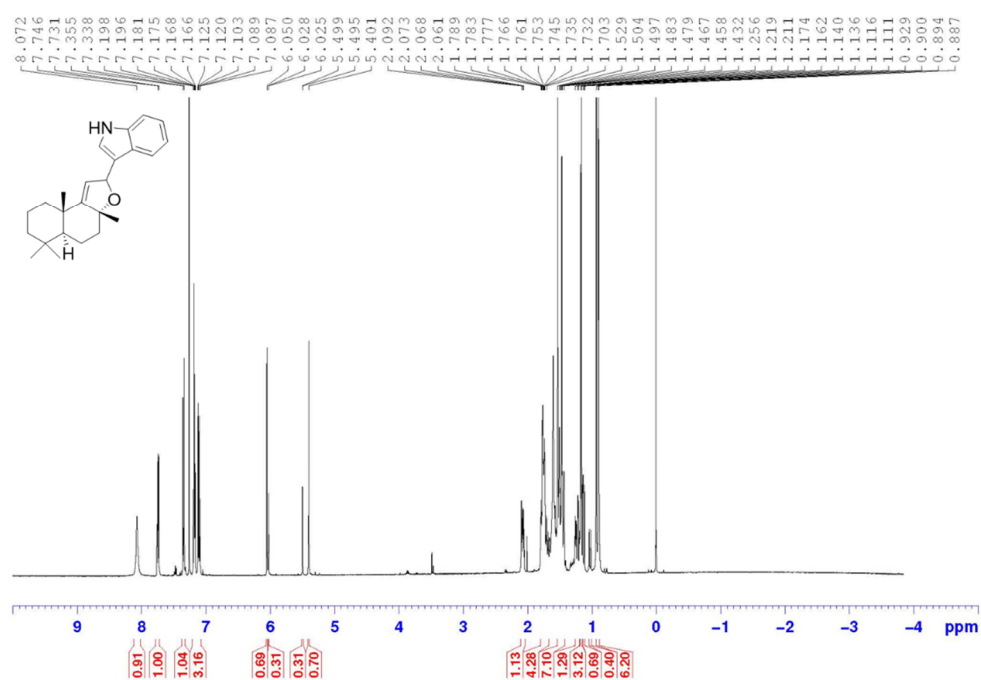

### <sup>1</sup>H NMR of Compound 6

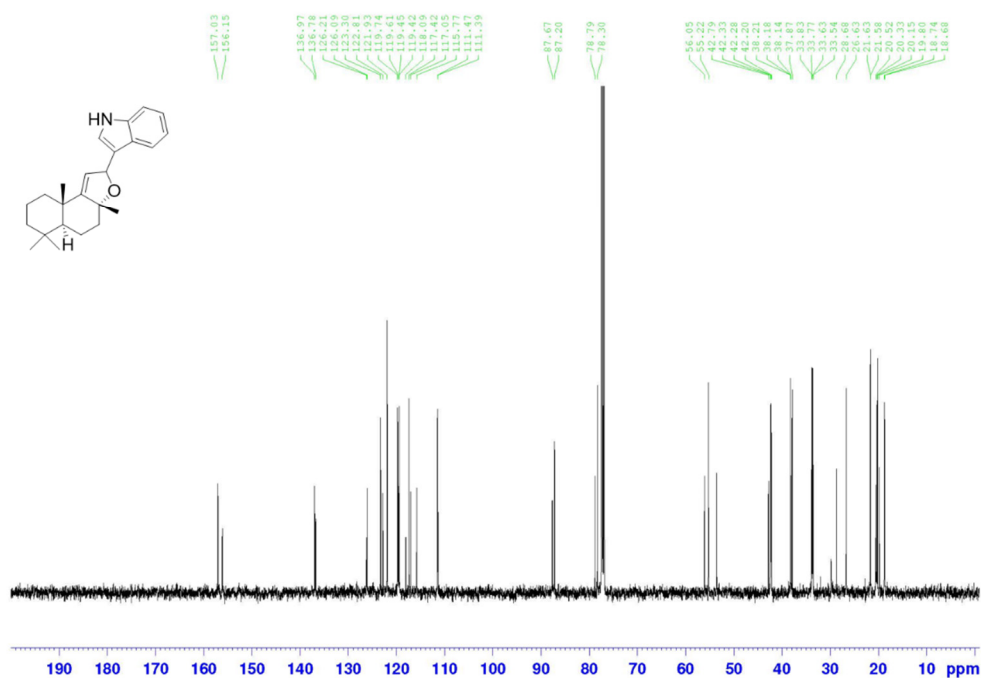

### <sup>13</sup>C NMR of Compound 6

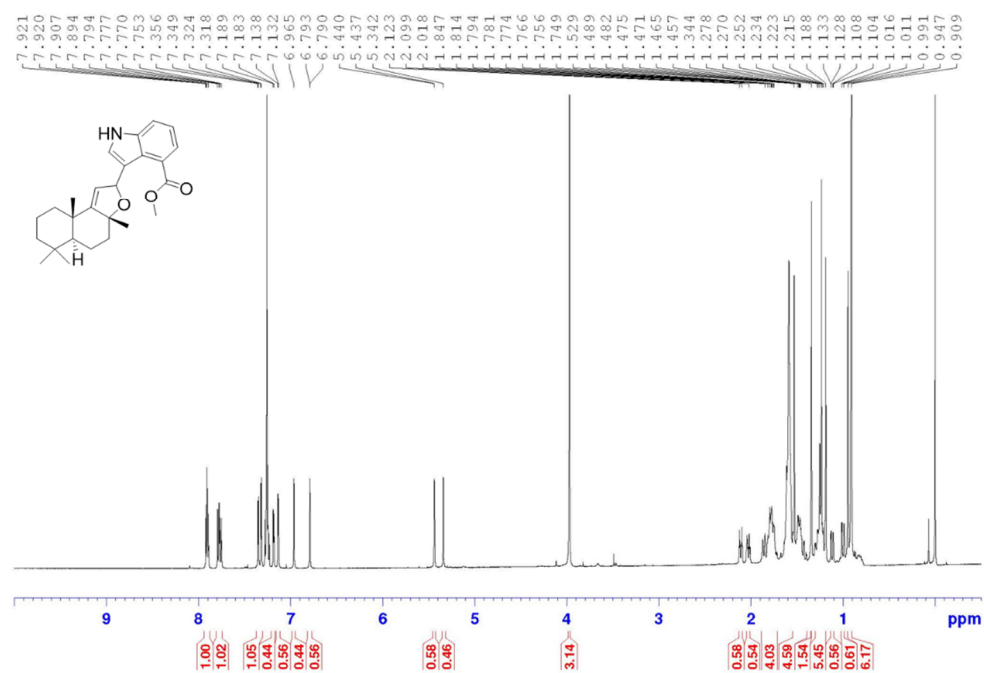

<sup>1</sup>H NMR of Compound **8a**

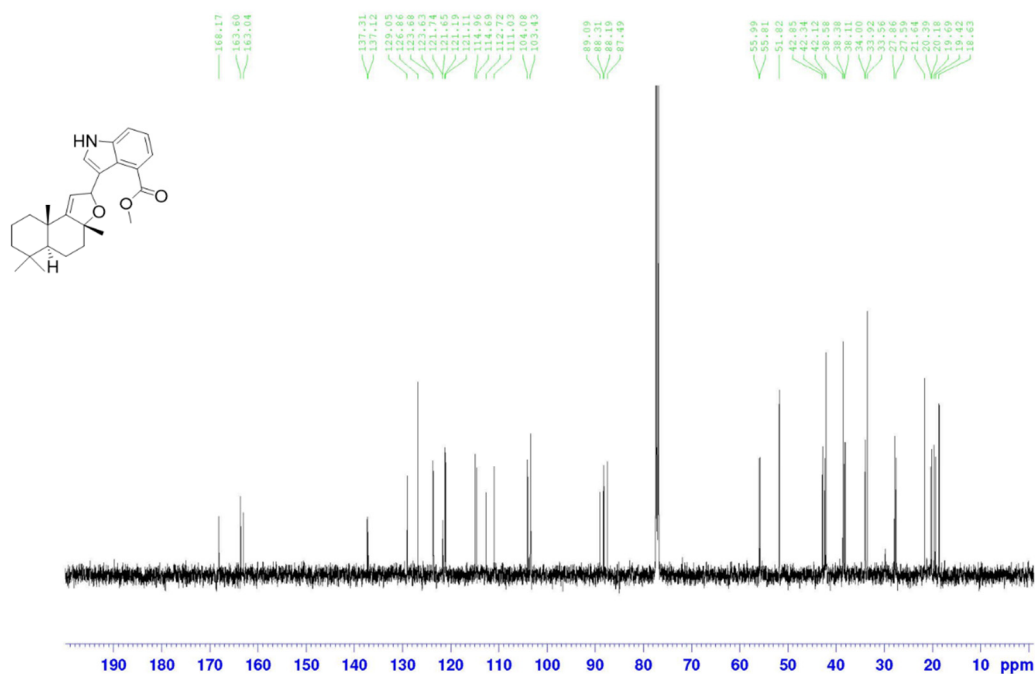

<sup>13</sup>C NMR of Compound **8a**

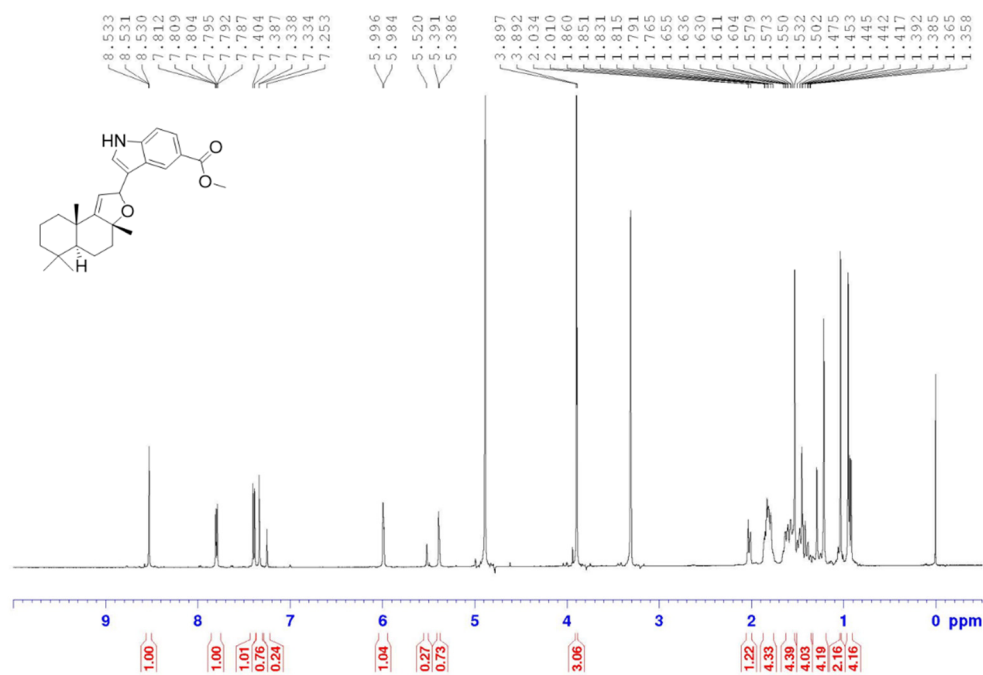

<sup>1</sup>H NMR of Compound **8b**

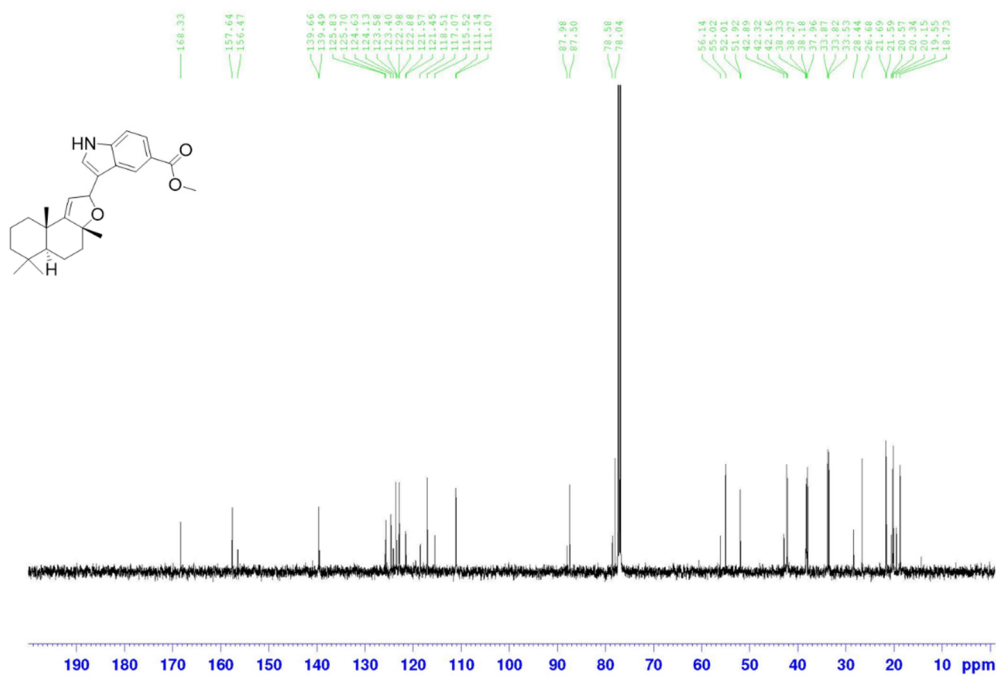

<sup>13</sup>C NMR of Compound **8b**

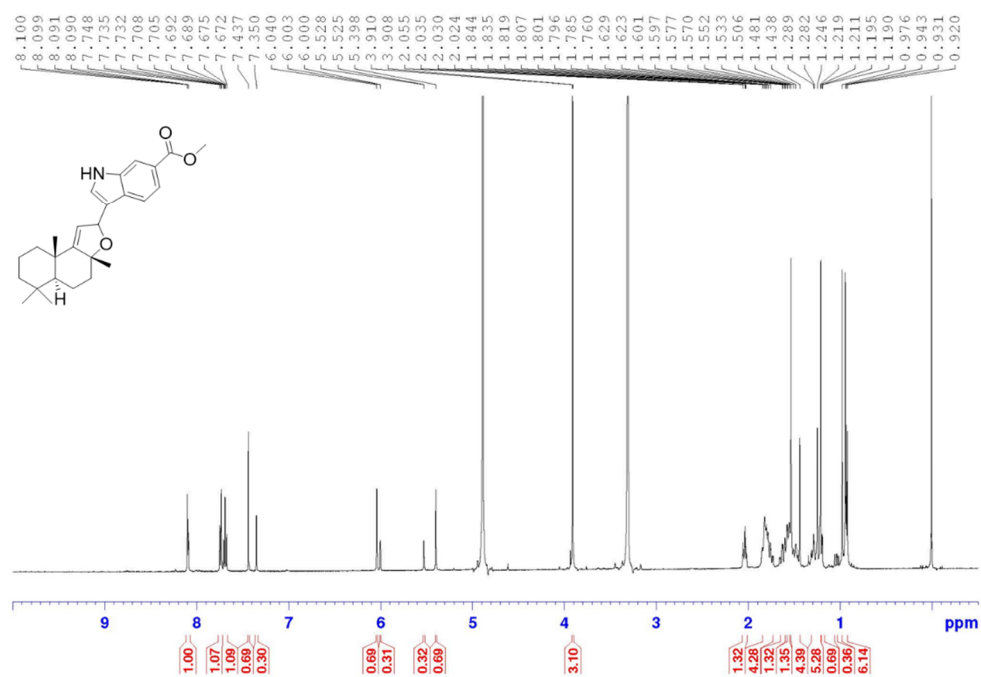

<sup>1</sup>H NMR of Compound 8c

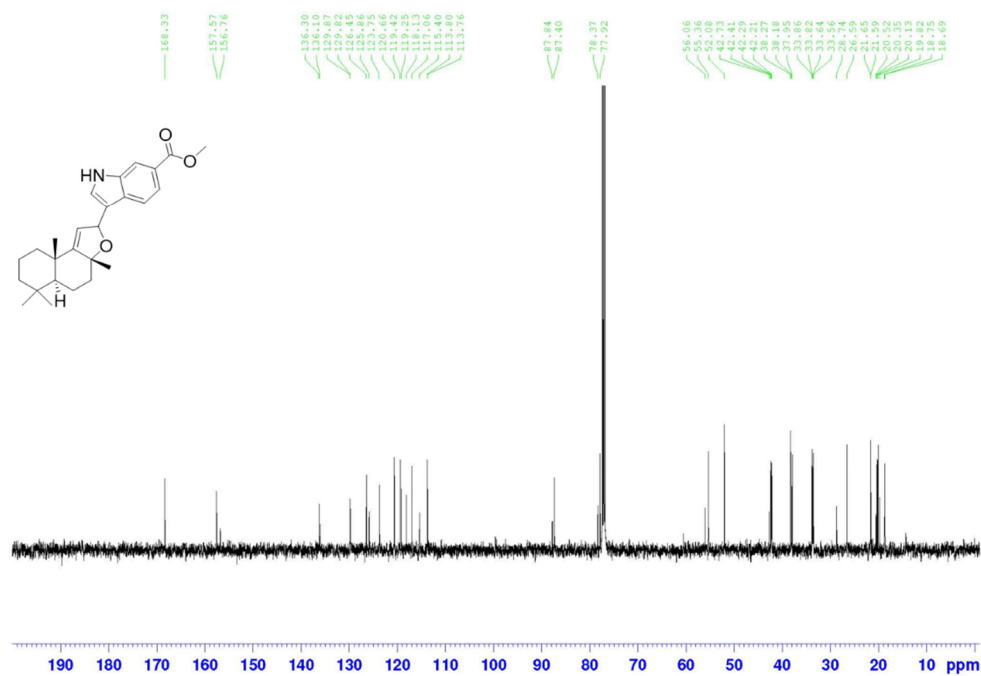

<sup>13</sup>C NMR of Compound 8c



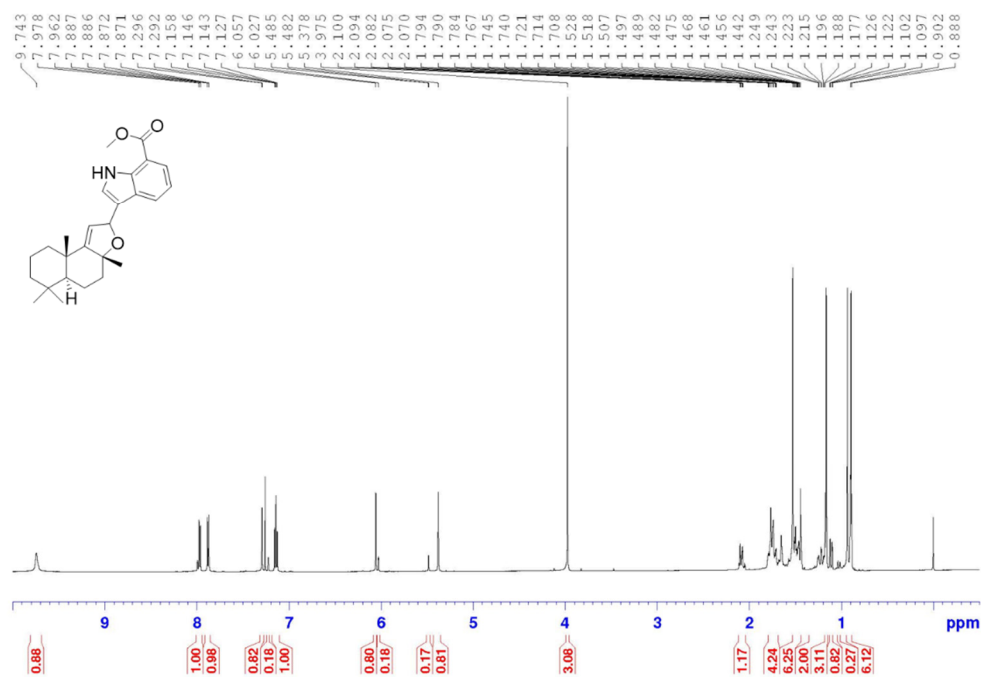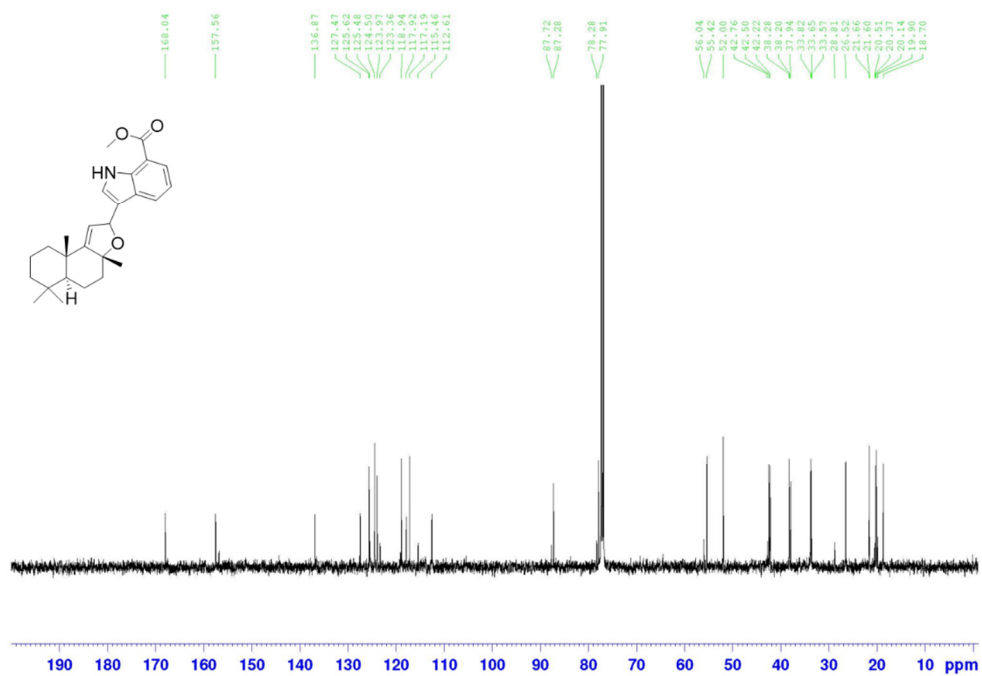

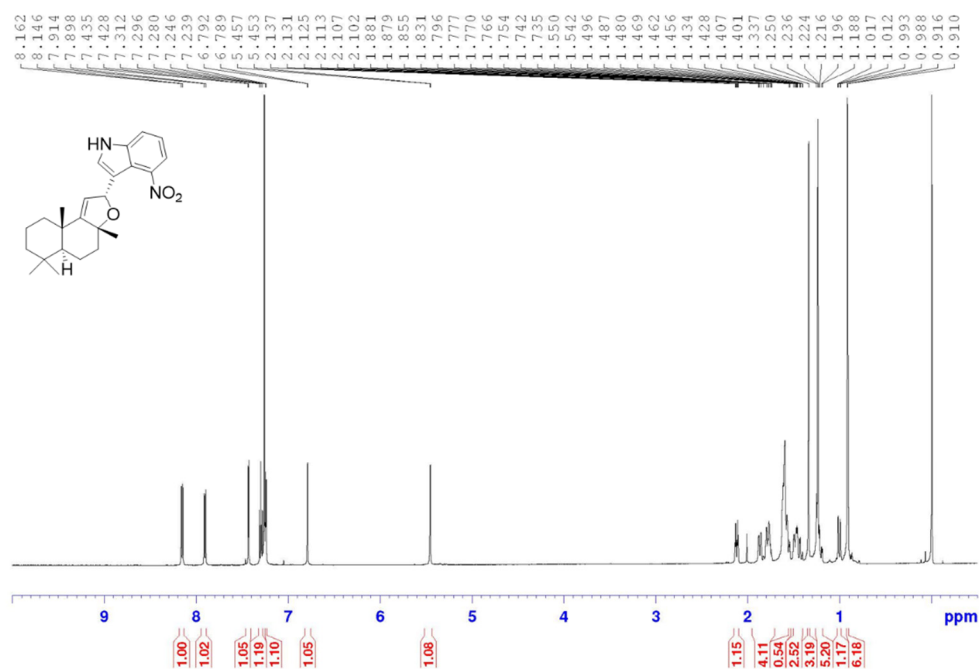

<sup>1</sup>H NMR of Compound 8e

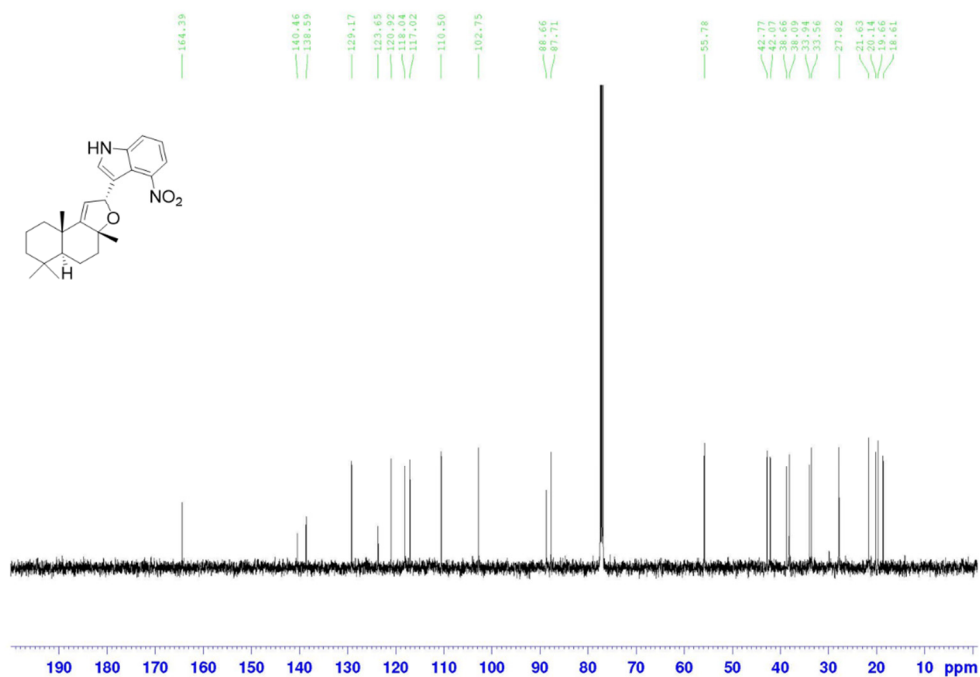

<sup>13</sup>C NMR of Compound 8e

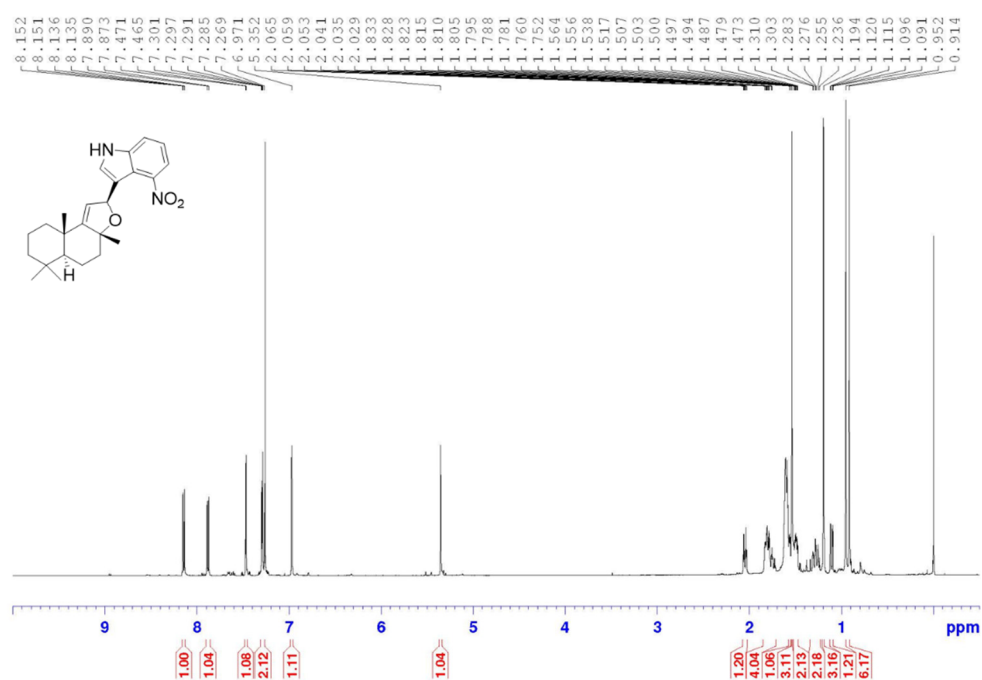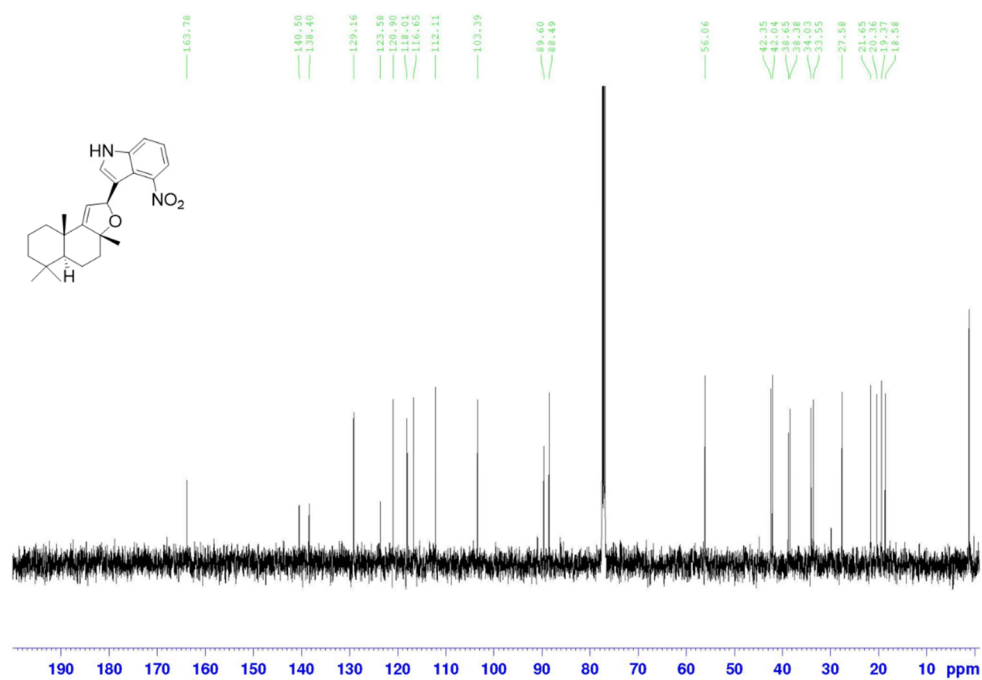

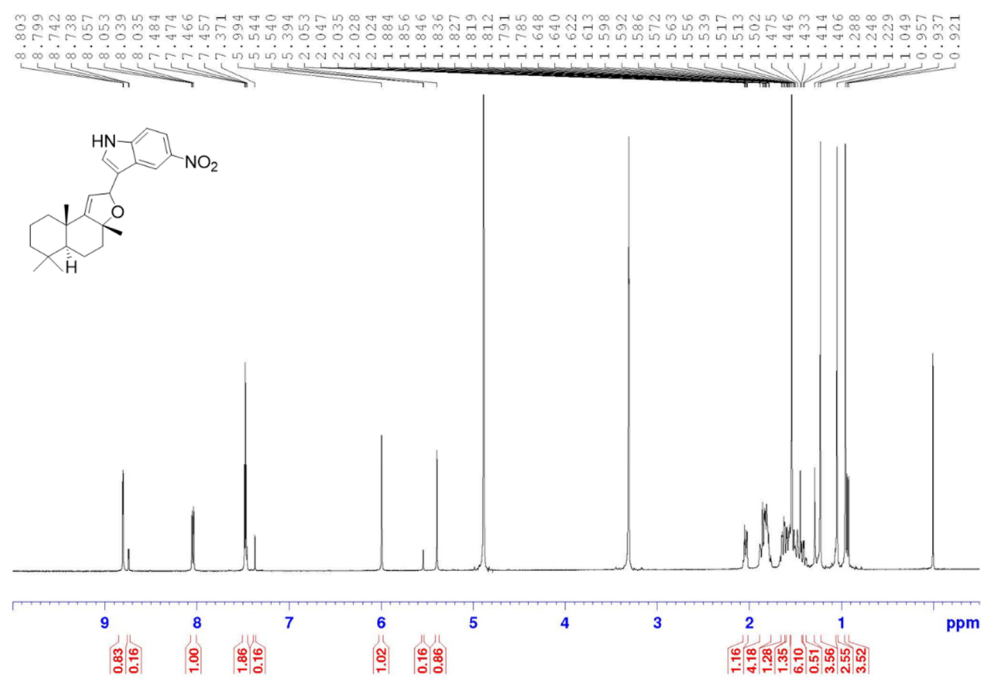

<sup>1</sup>H NMR of Compound 8f

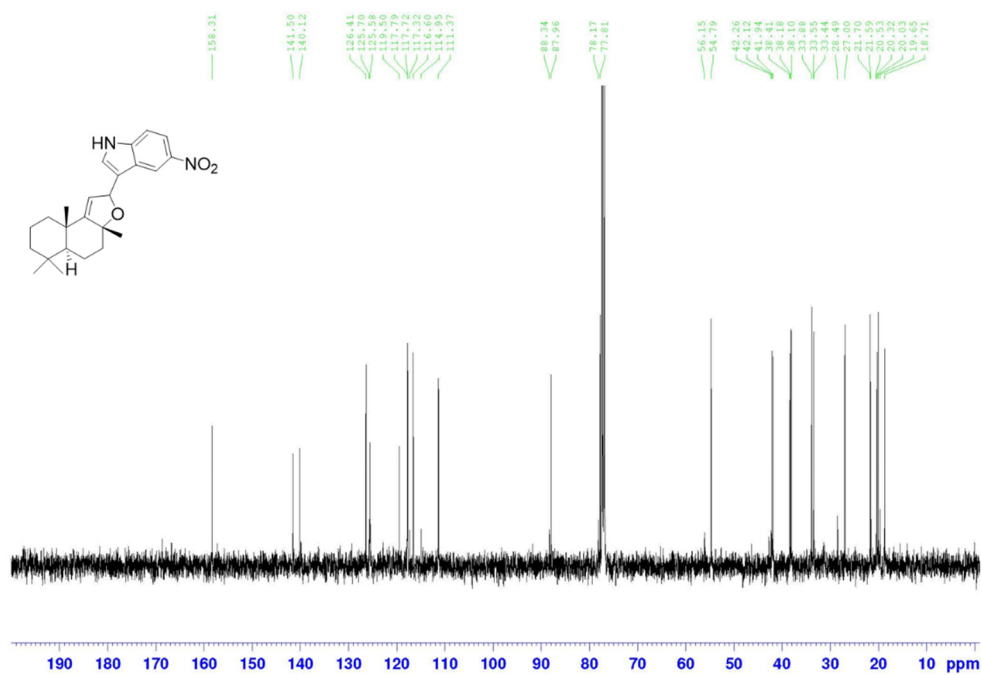

<sup>13</sup>C NMR of Compound 8f

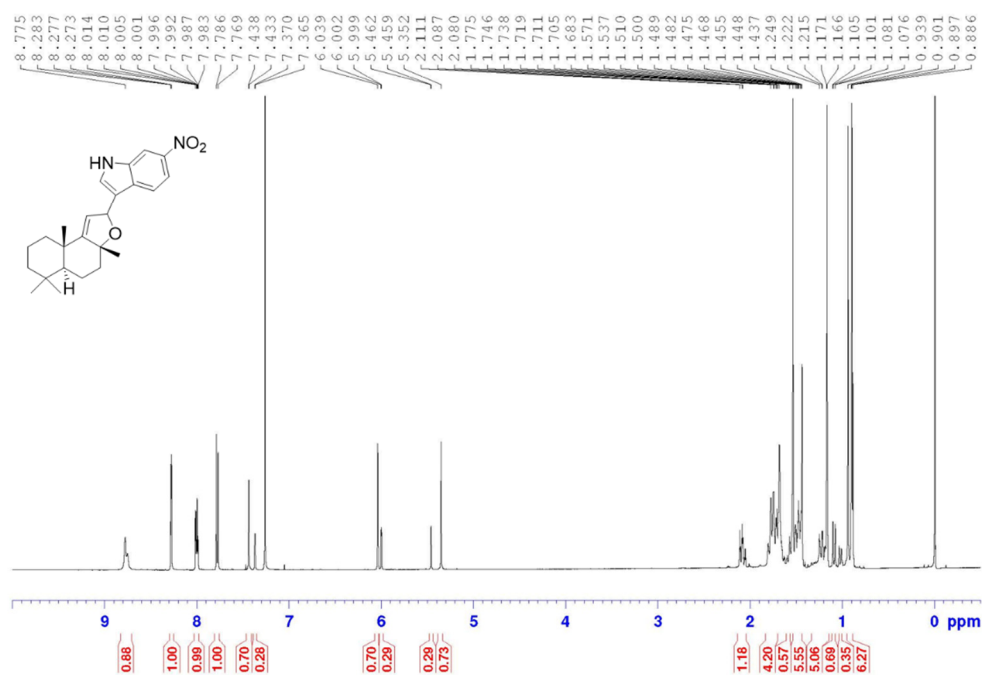

<sup>1</sup>H NMR of Compound **8g**

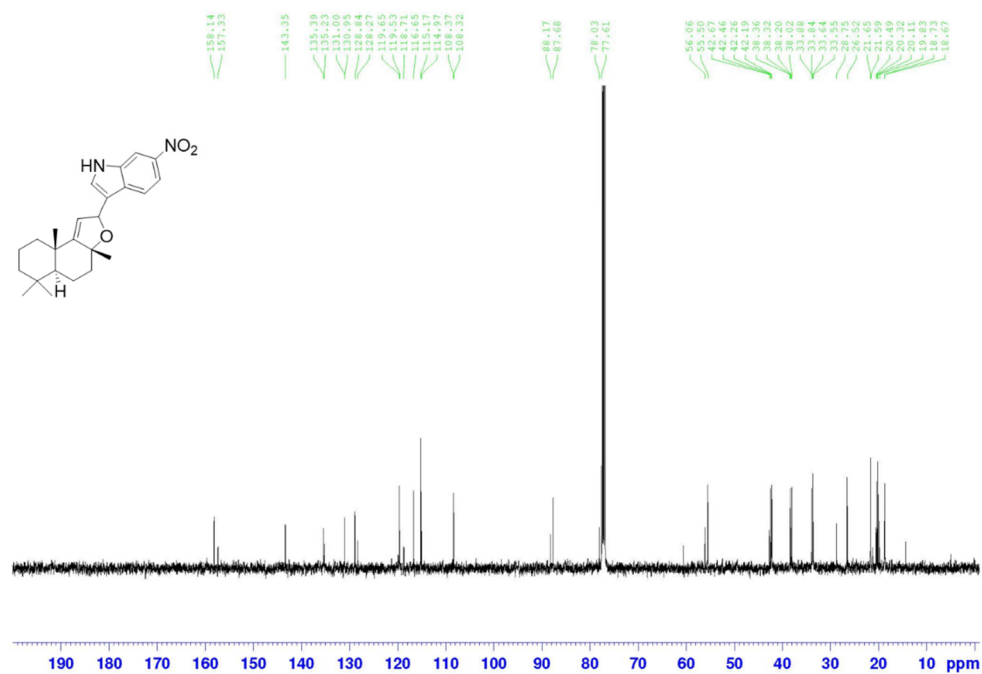

<sup>13</sup>C NMR of Compound **8g**

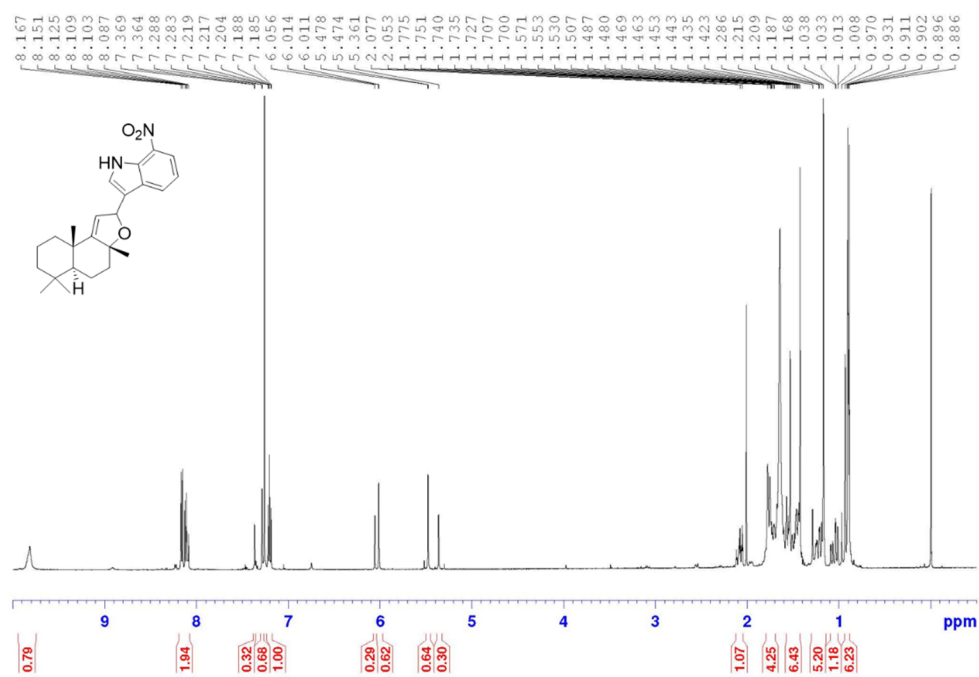

**<sup>1</sup>H NMR of Compound 8h**

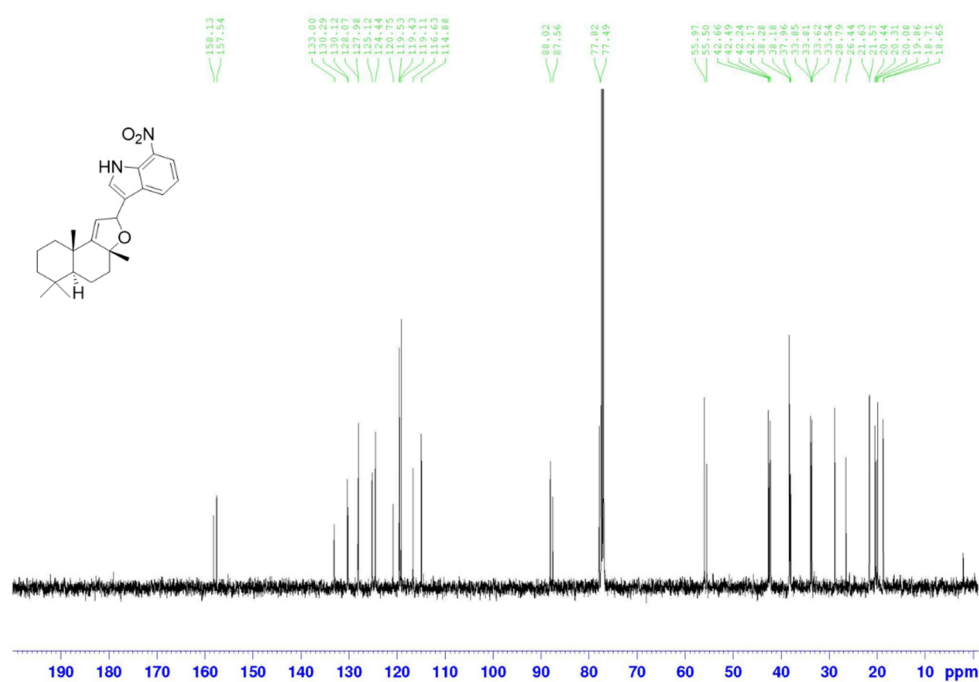

**<sup>13</sup>C NMR of Compound 8h**

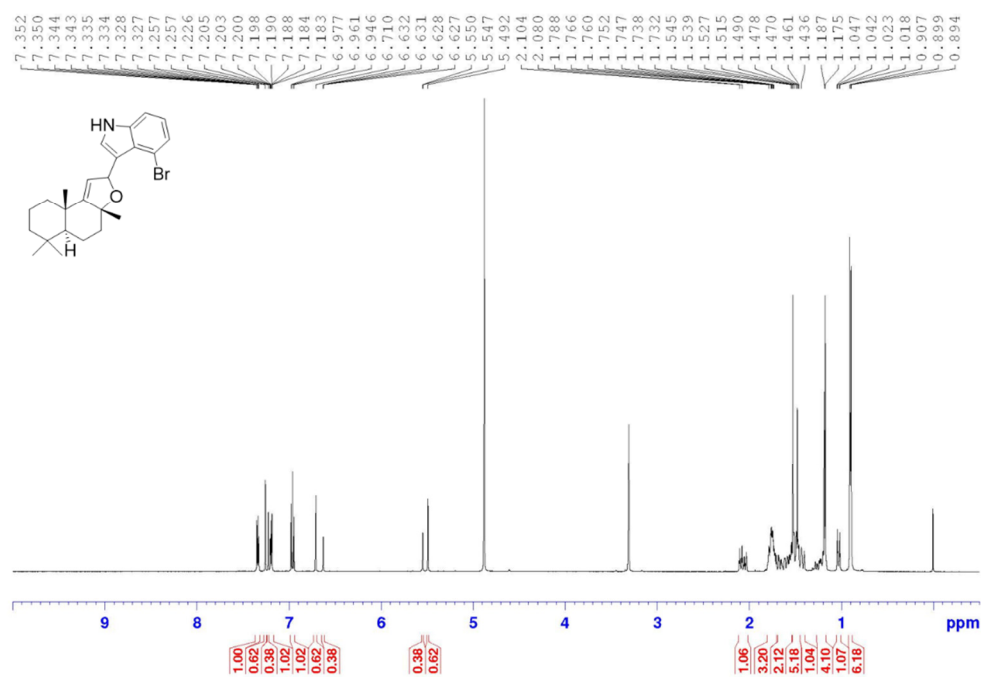

<sup>1</sup>H NMR of Compound **8i**

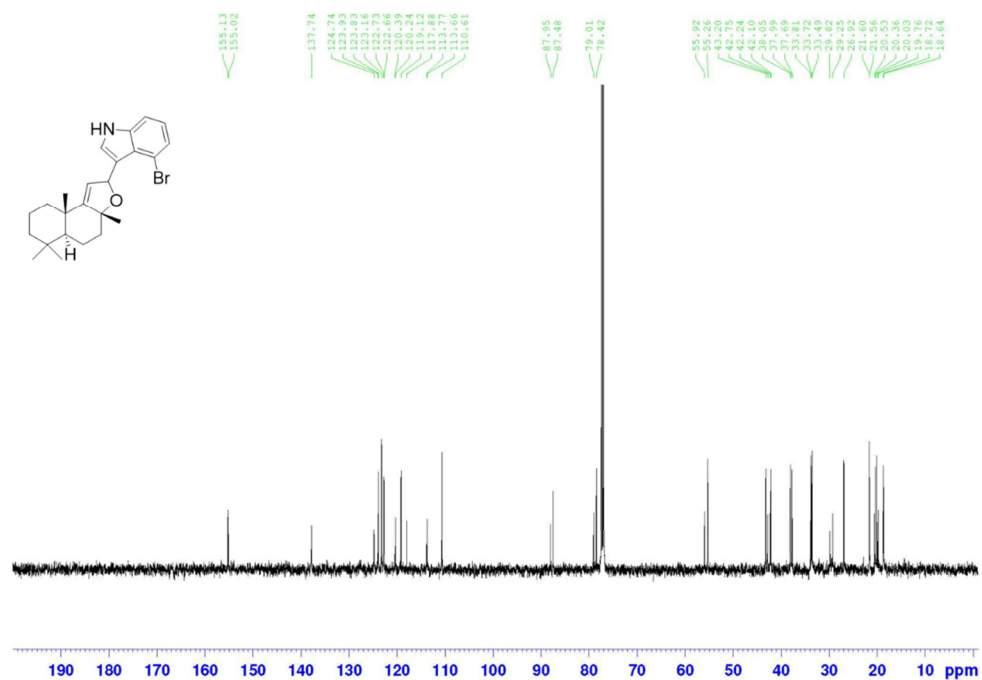

<sup>13</sup>C NMR of Compound **8i**

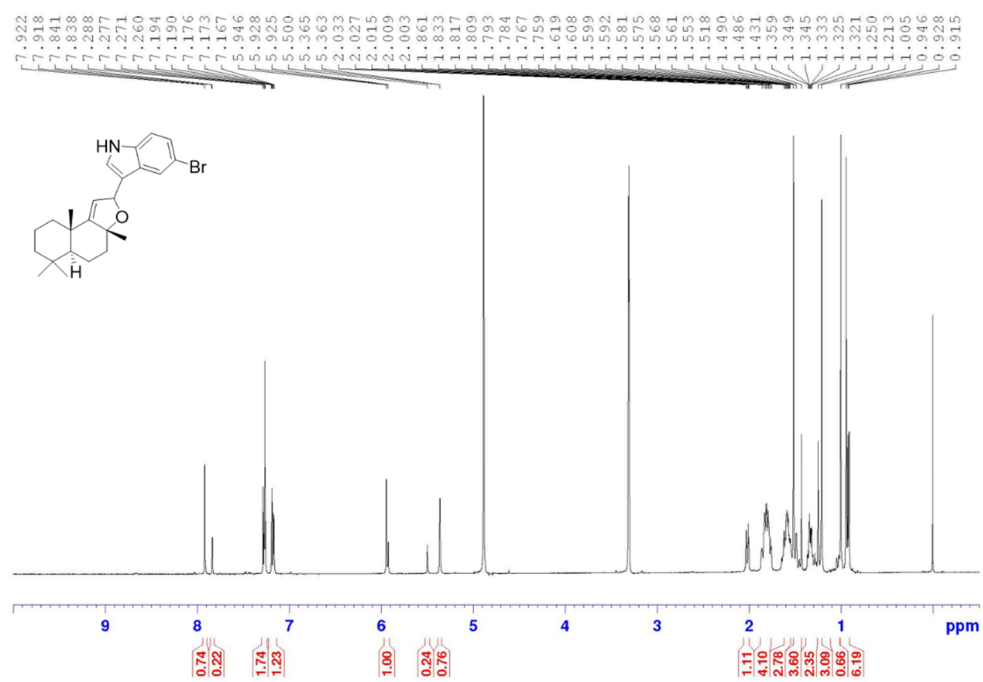

<sup>1</sup>H NMR of Compound 8j

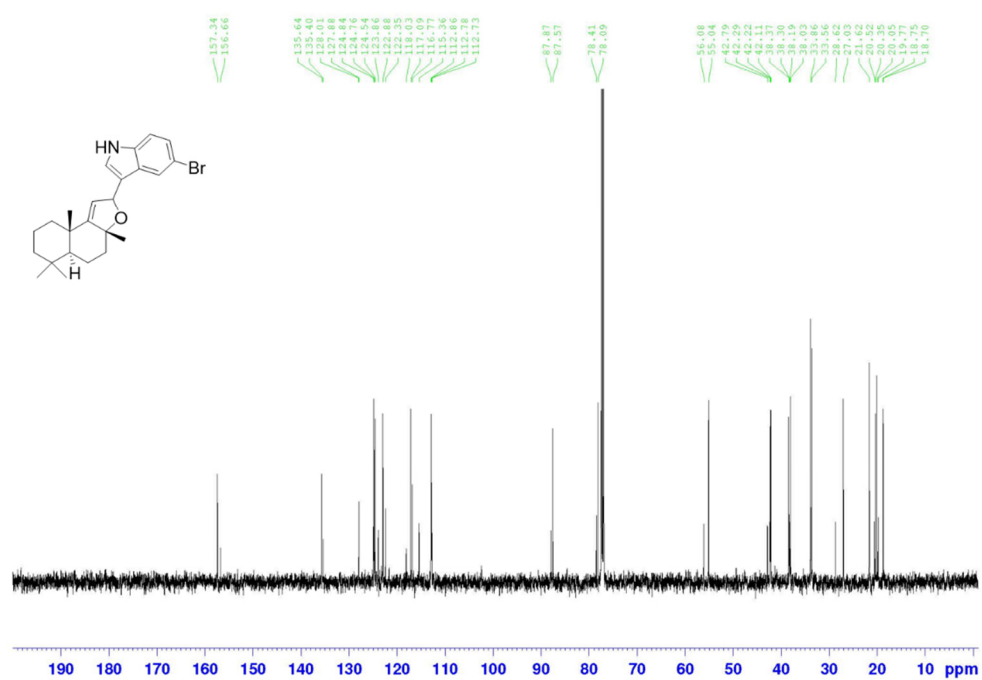

<sup>13</sup>C NMR of Compound 8j



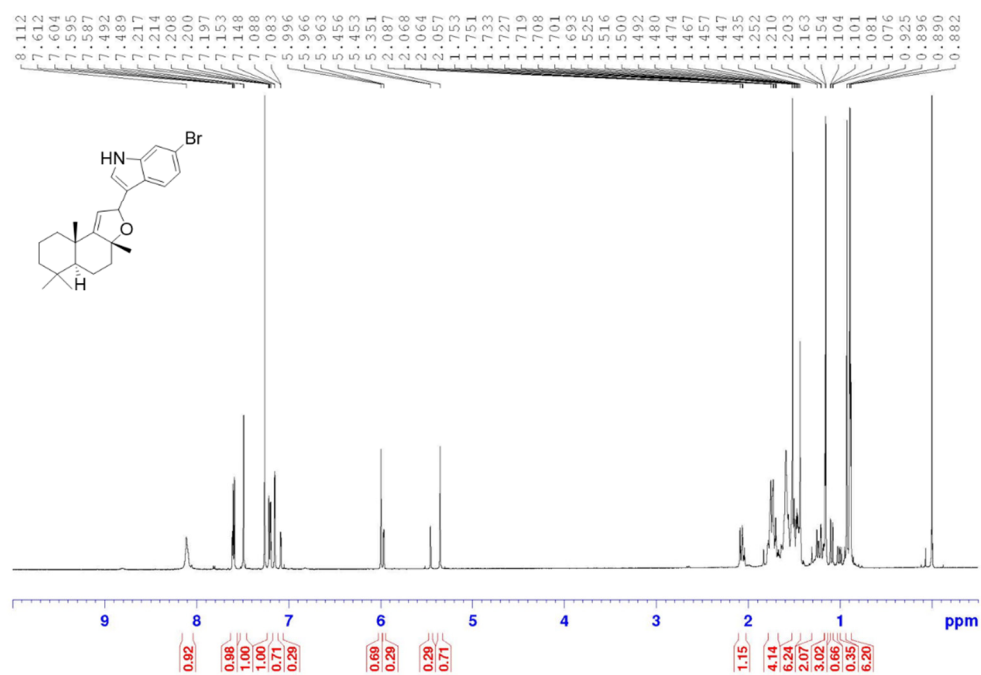

<sup>1</sup>H NMR of Compound 8k

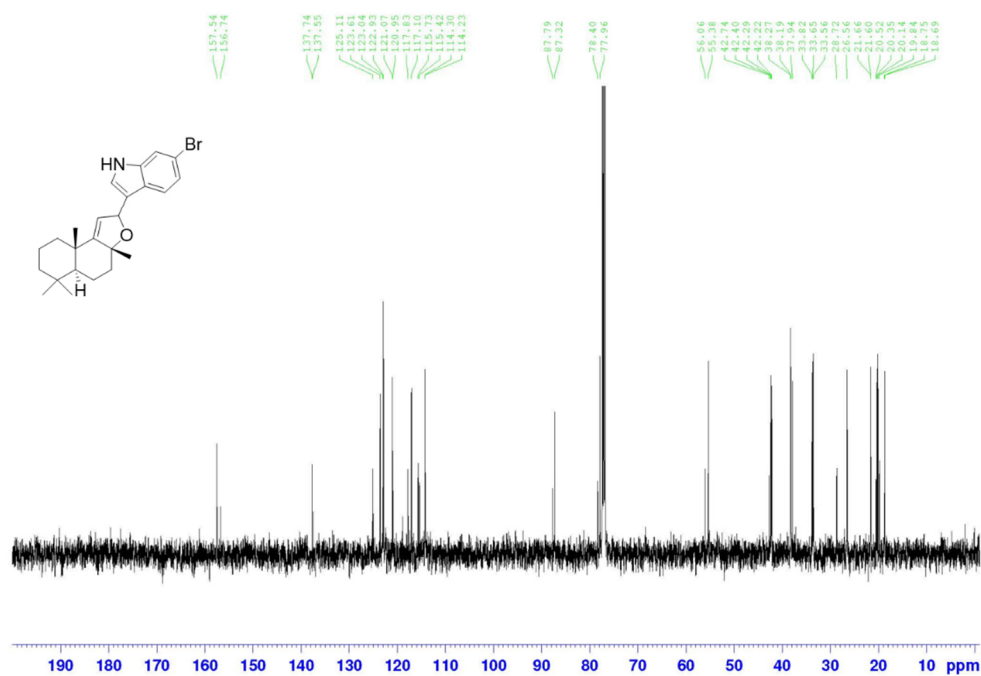

<sup>13</sup>C NMR of Compound 8k

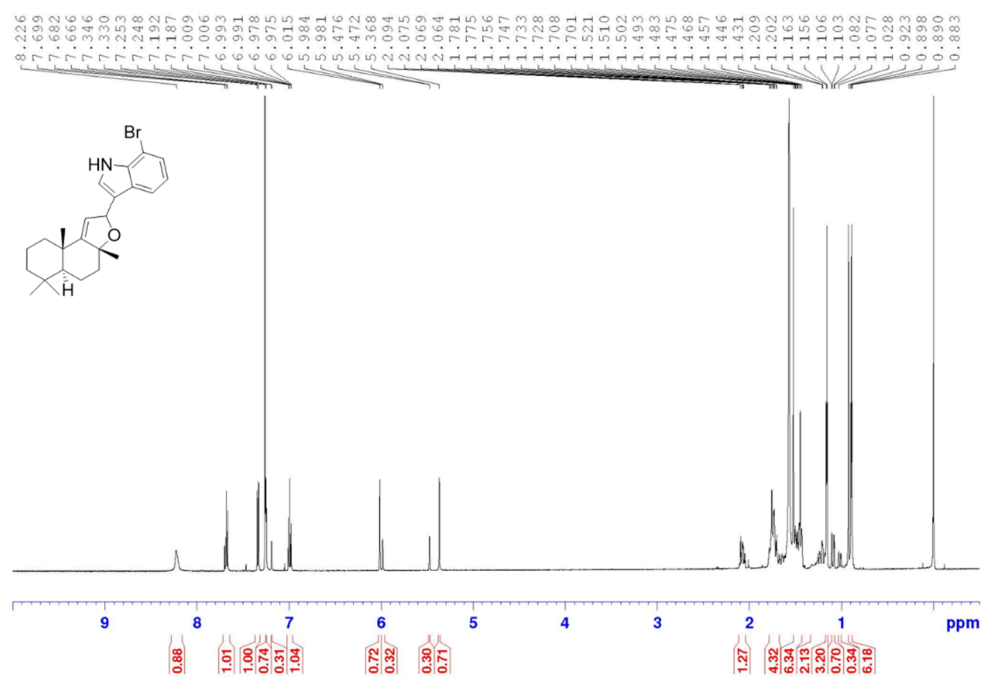

**<sup>1</sup>H NMR of Compound 81**

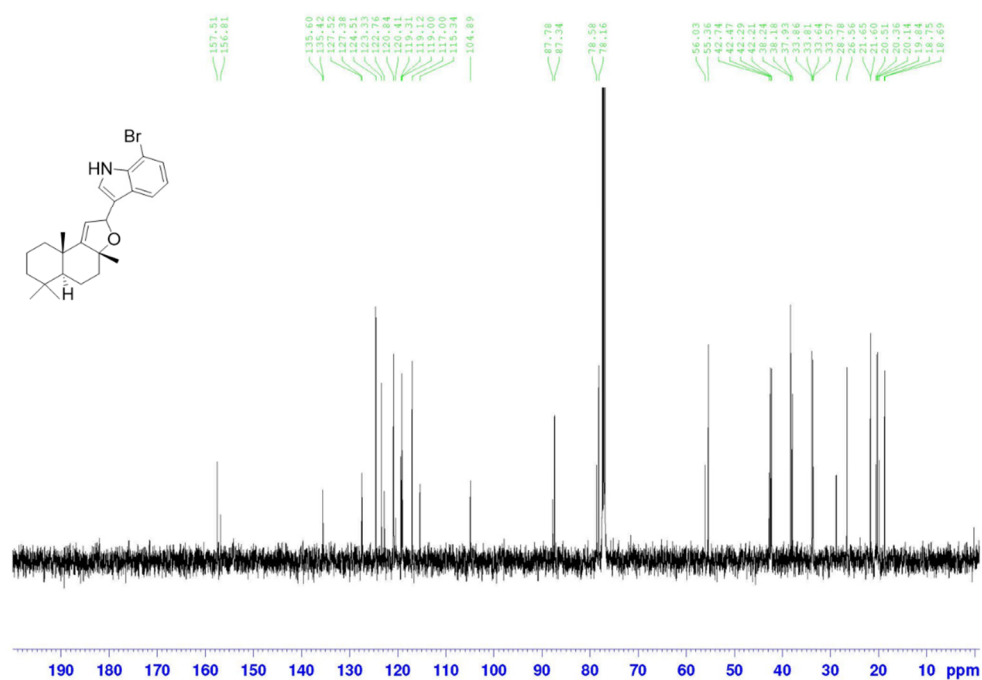

**<sup>13</sup>C NMR of Compound 81**

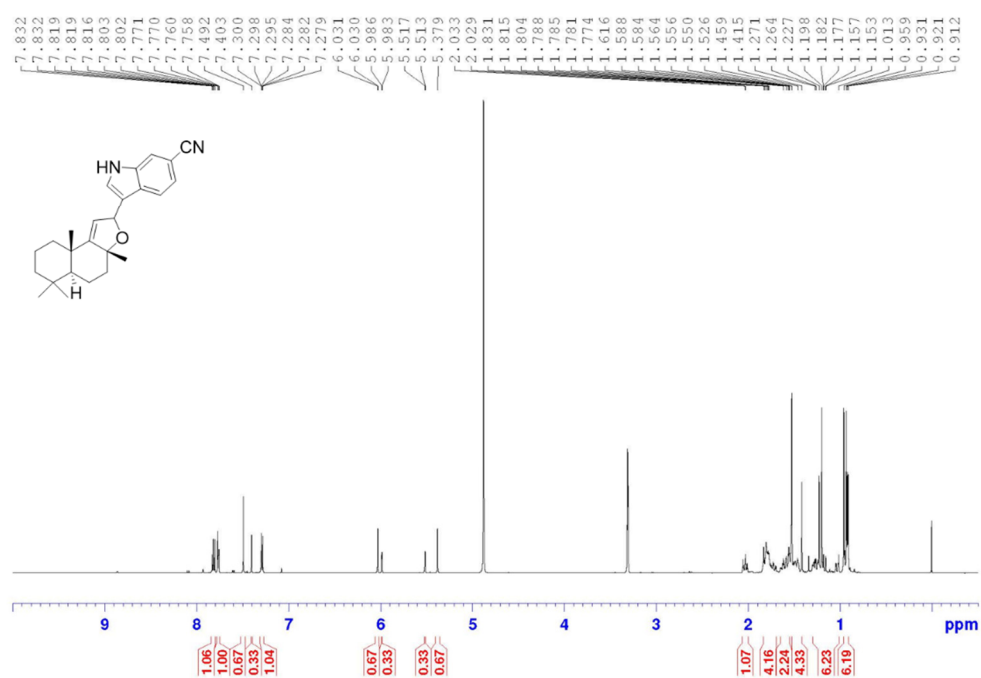

<sup>1</sup>H NMR of Compound **8m**

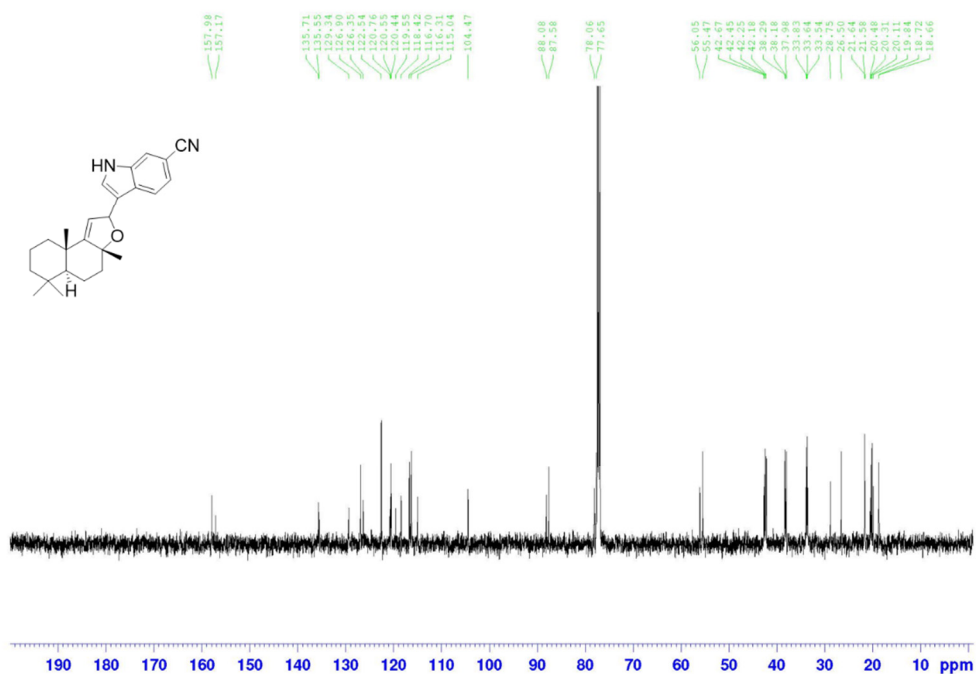

<sup>13</sup>C NMR of Compound **8m**

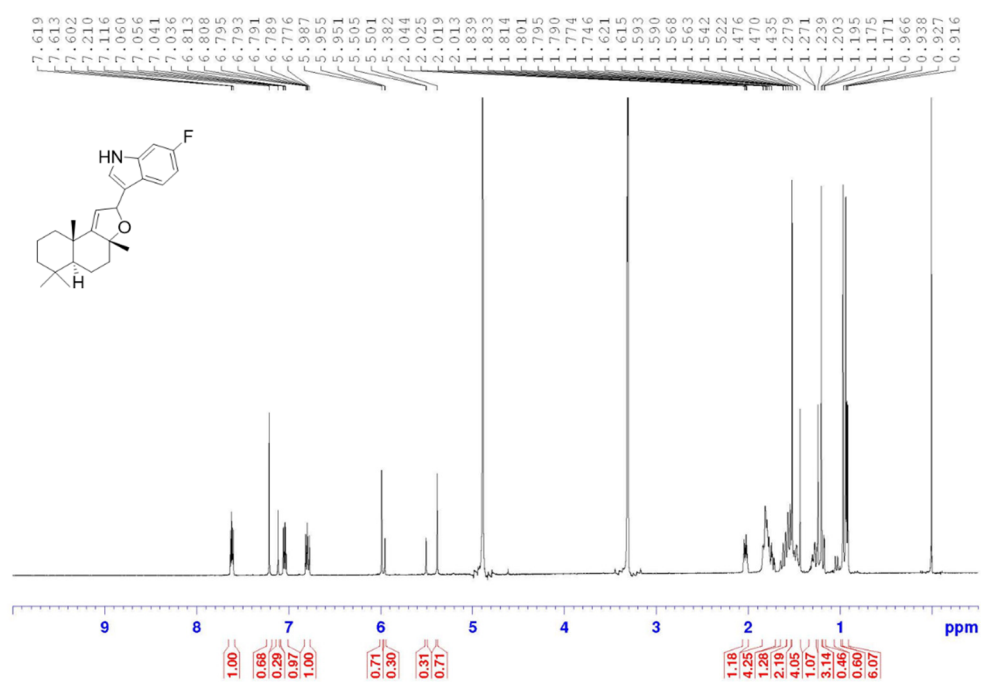

**<sup>1</sup>H NMR of Compound 8n**

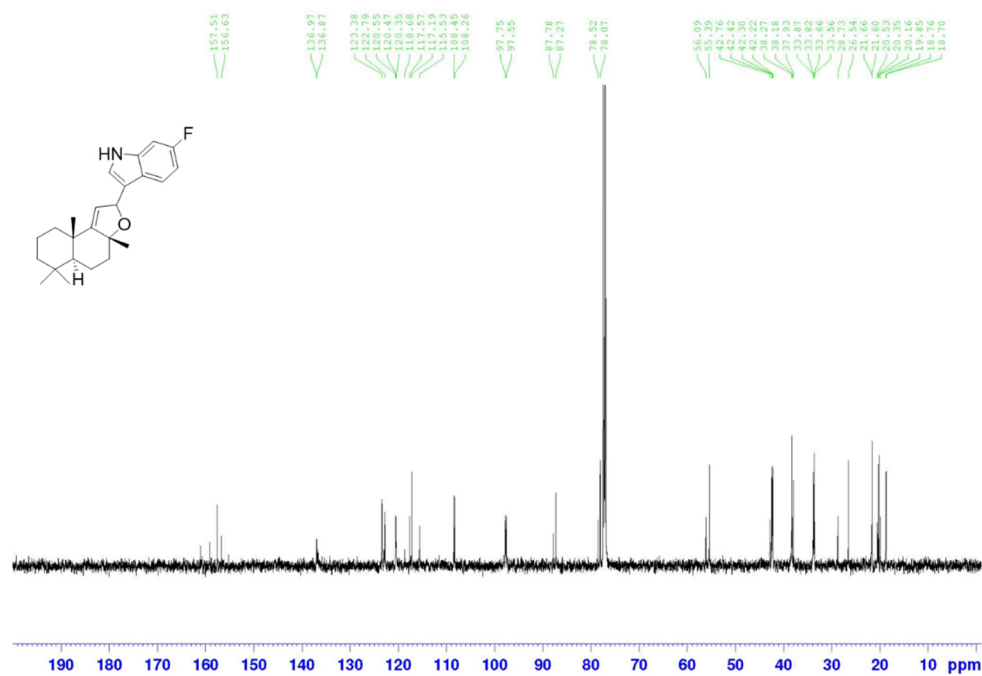

**<sup>13</sup>C NMR of Compound 8n**

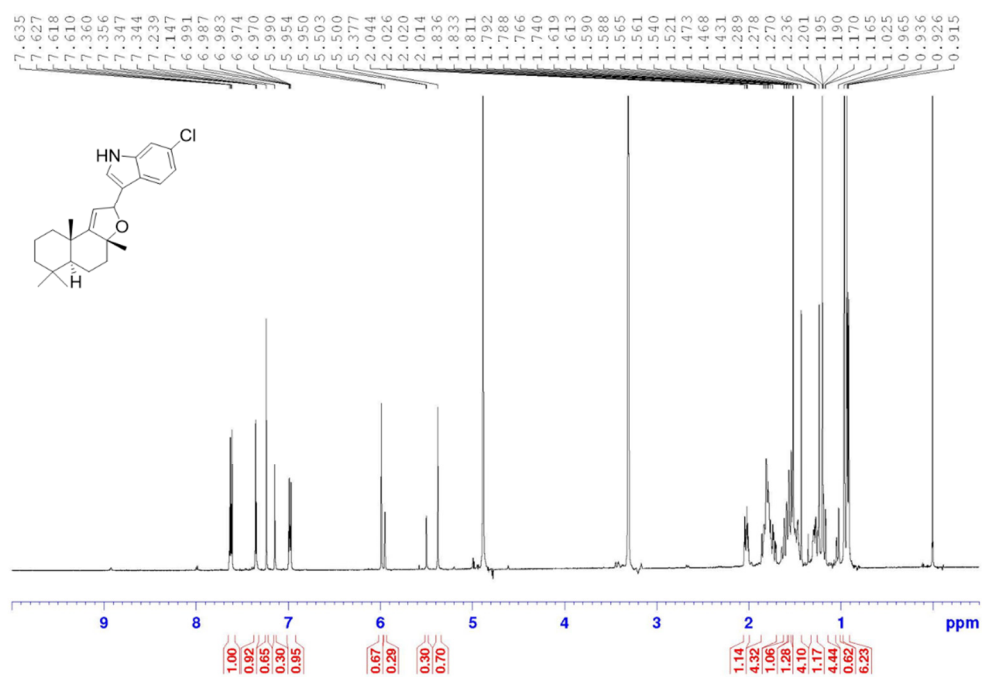

<sup>1</sup>H NMR of Compound 8p

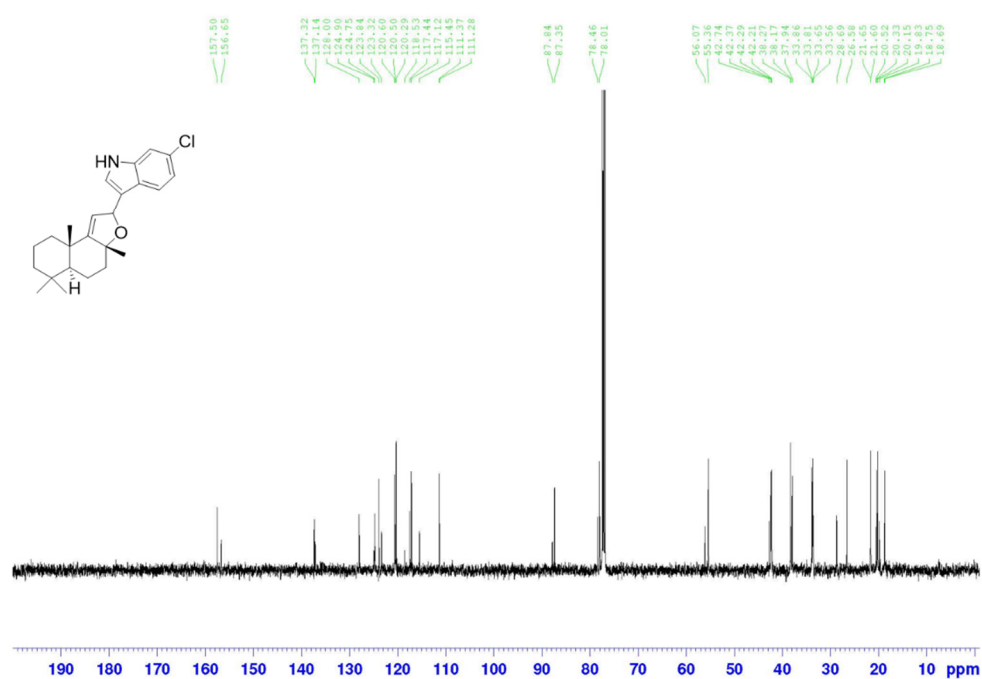

<sup>13</sup>C NMR of Compound 8p

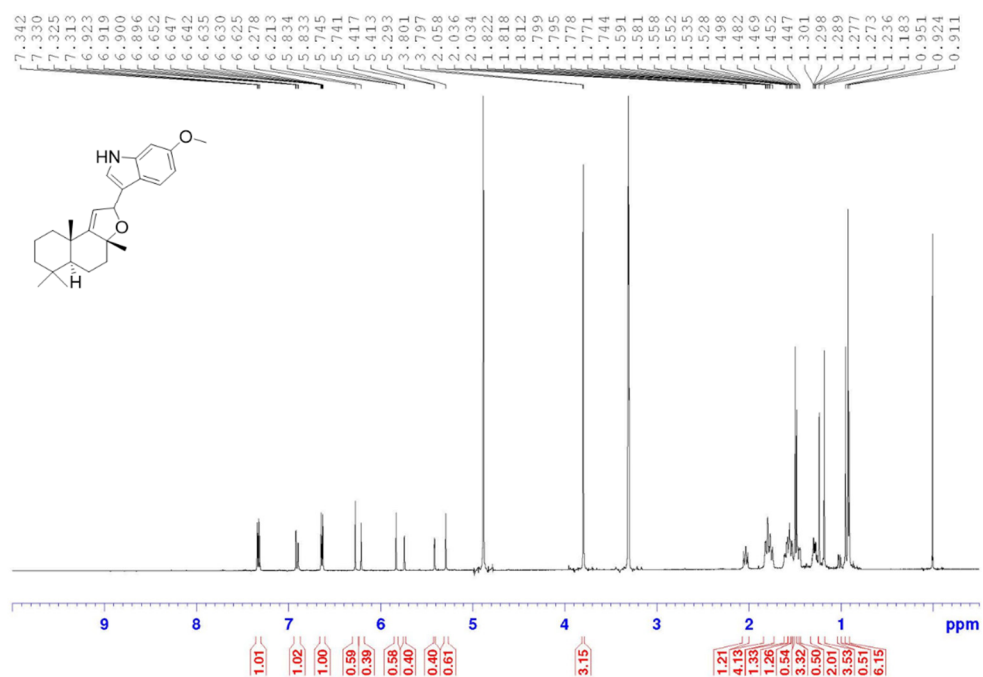

<sup>1</sup>H NMR of Compound **8q**

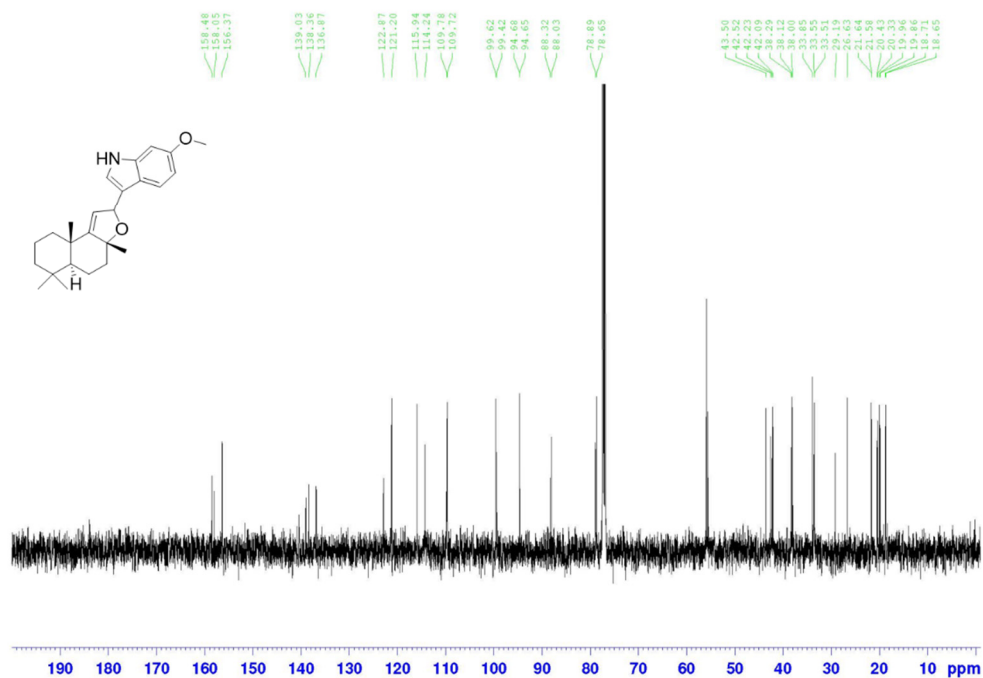

<sup>13</sup>C NMR of Compound **8q**

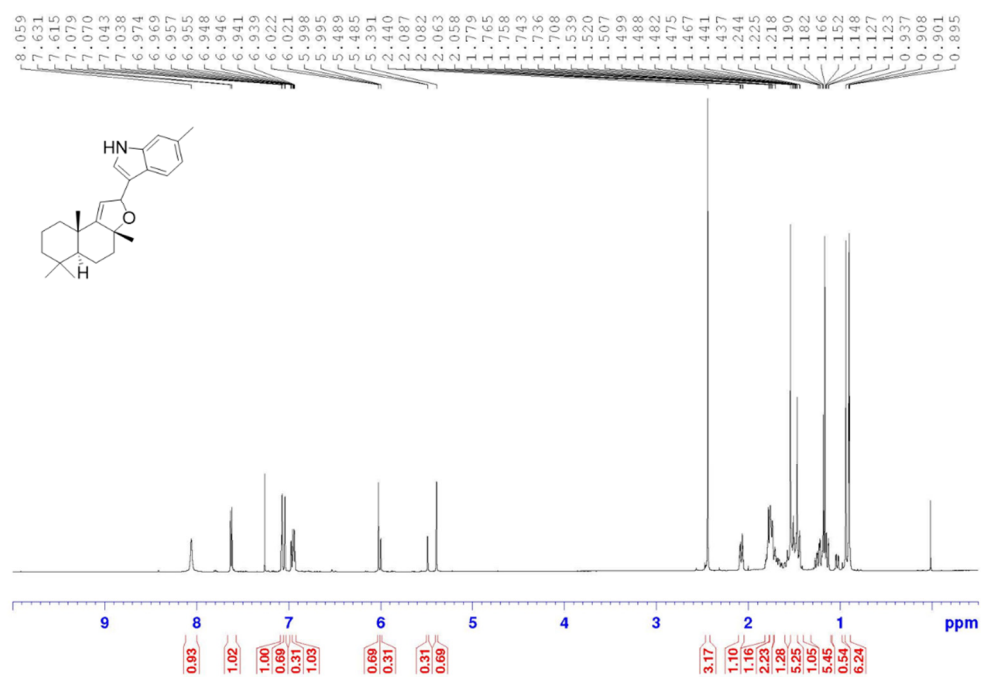

<sup>1</sup>H NMR of Compound **8r**

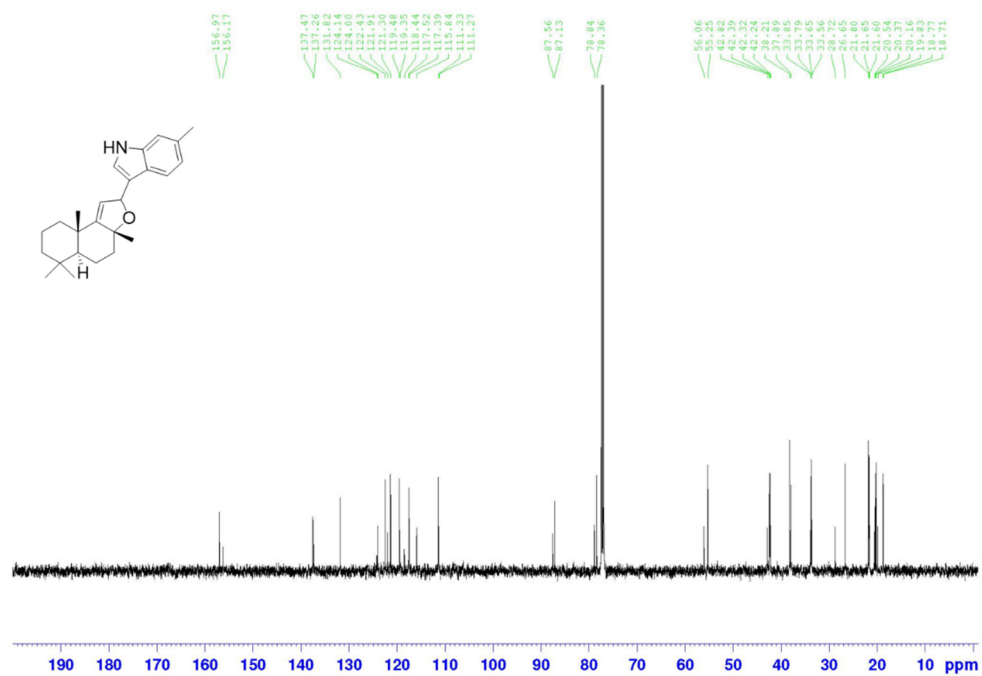

<sup>13</sup>C NMR of Compound **8r**

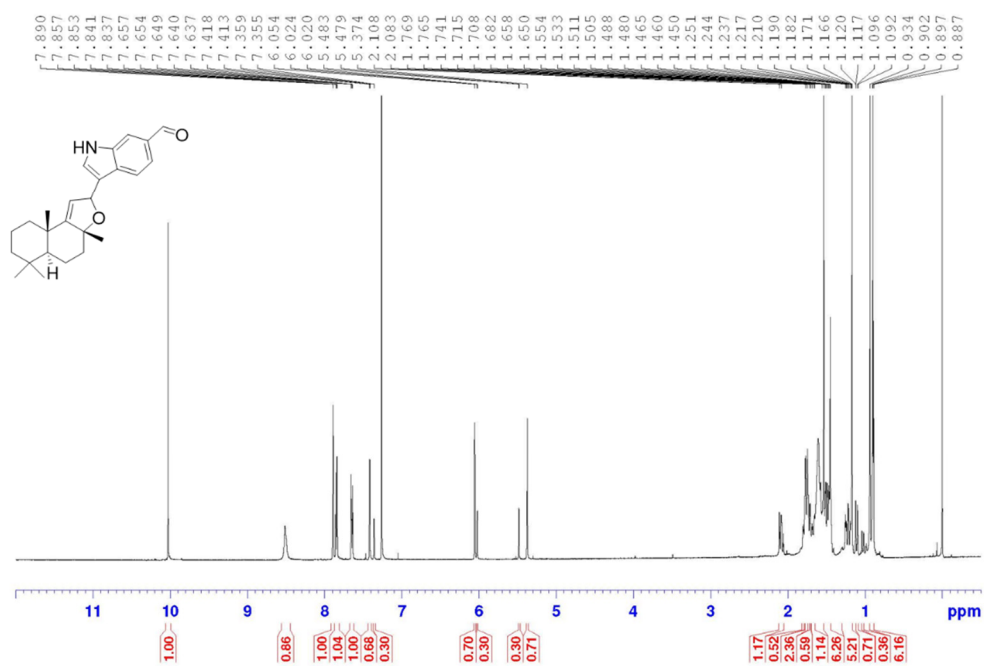

<sup>1</sup>H NMR of Compound 8s

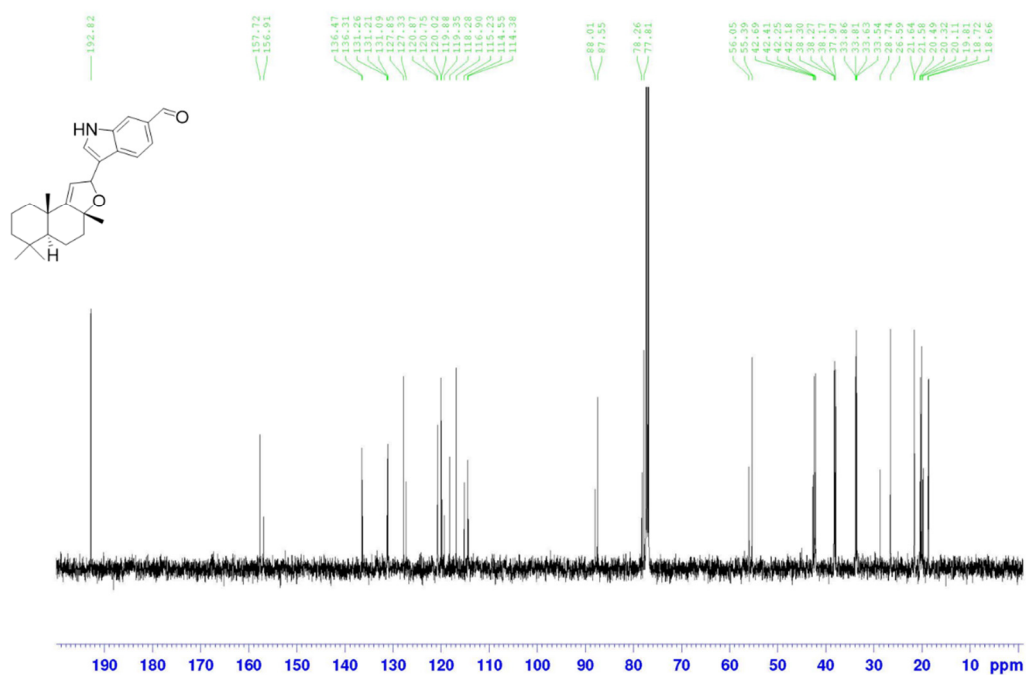

<sup>13</sup>C NMR of Compound 8s



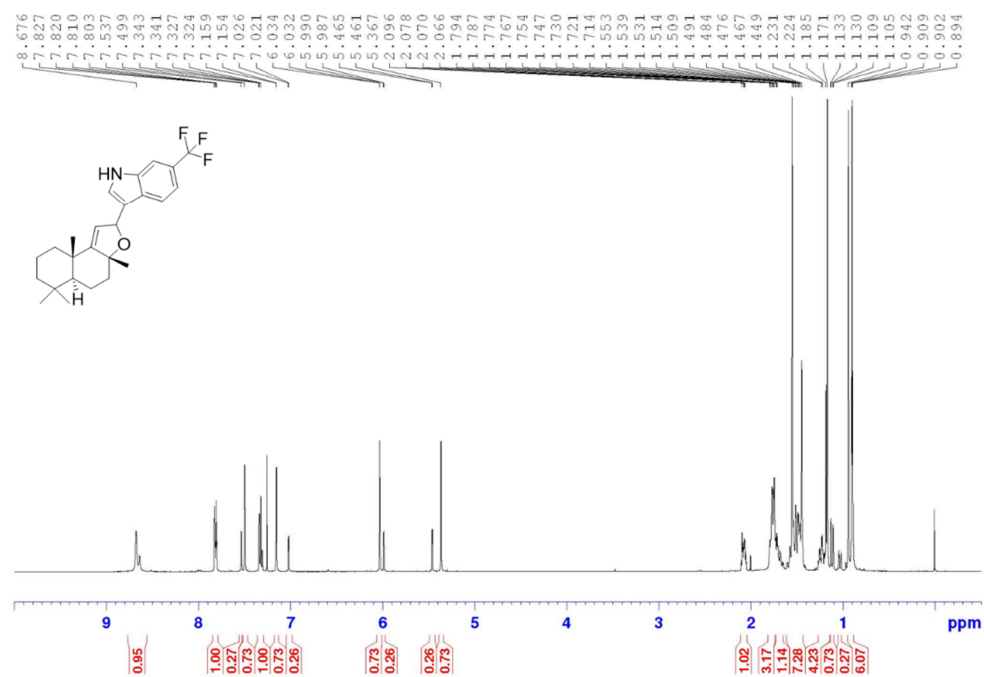

<sup>1</sup>H NMR of Compound 8t

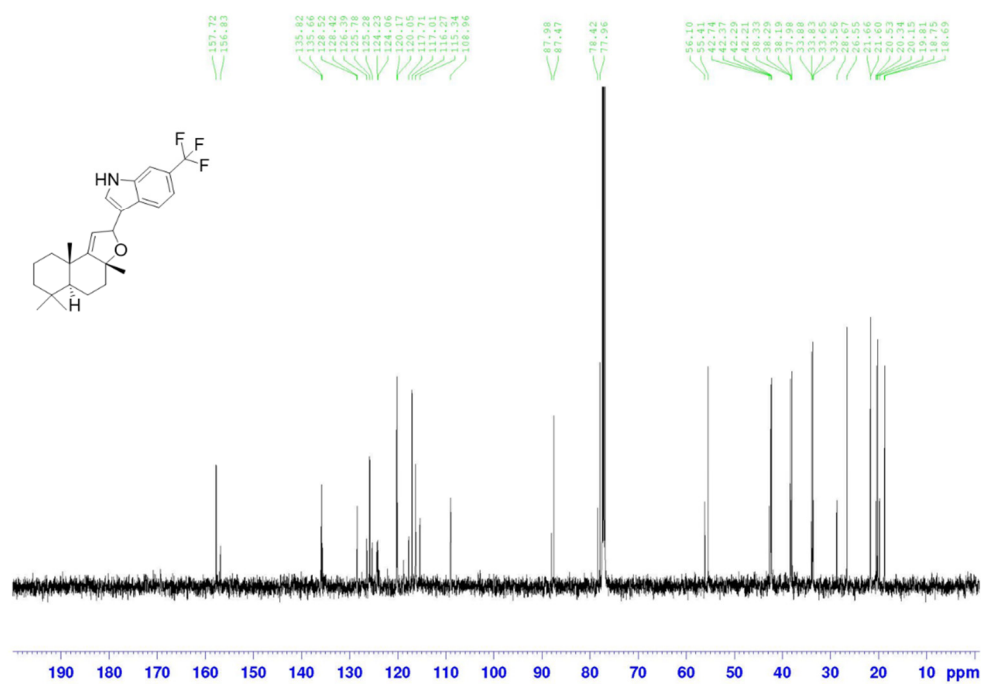

<sup>13</sup>C NMR of Compound 8t

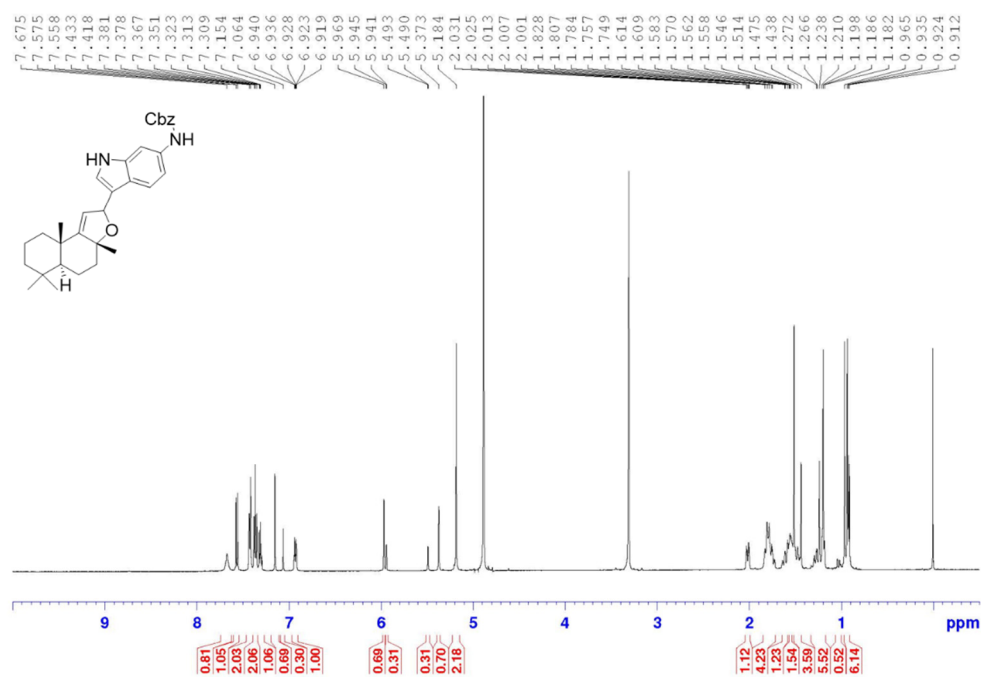

<sup>1</sup>H NMR of Compound **8u**

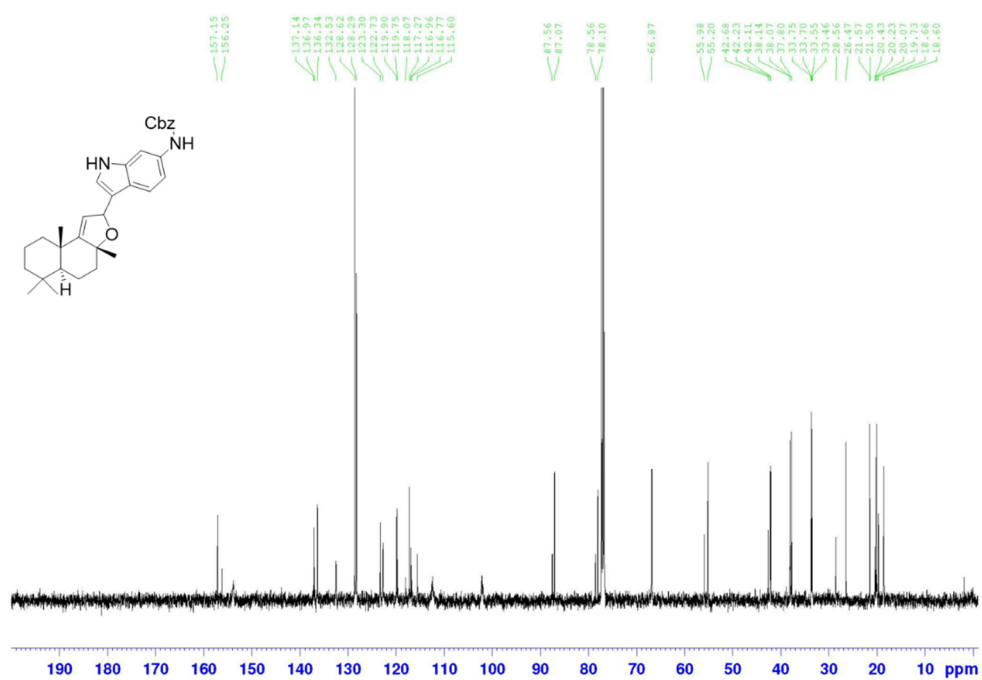

<sup>13</sup>C NMR of Compound **8u**

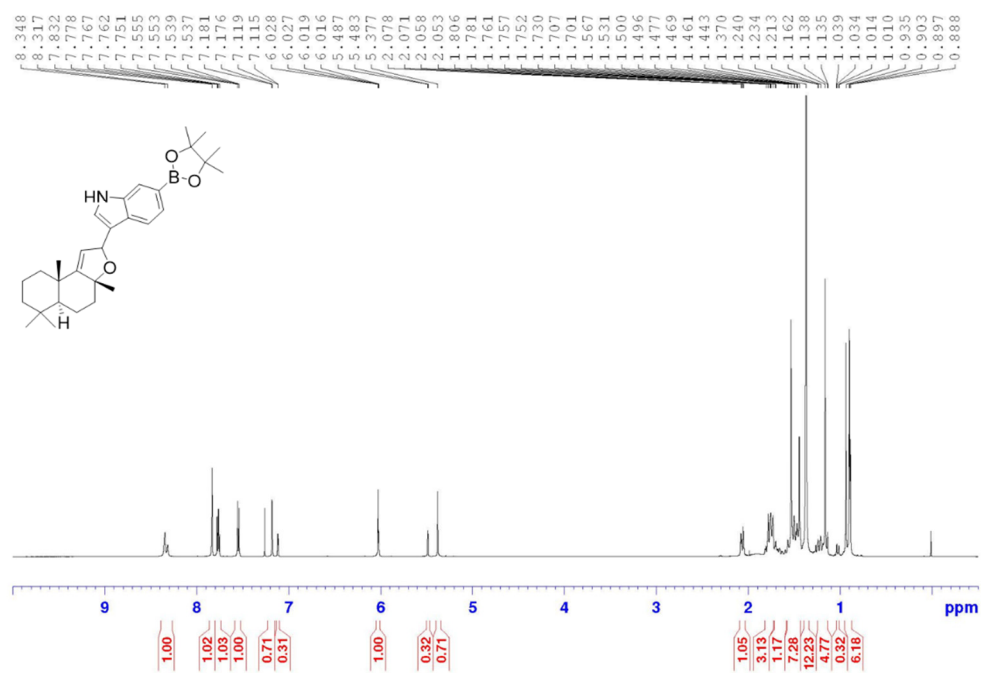

<sup>1</sup>H NMR of Compound 8v

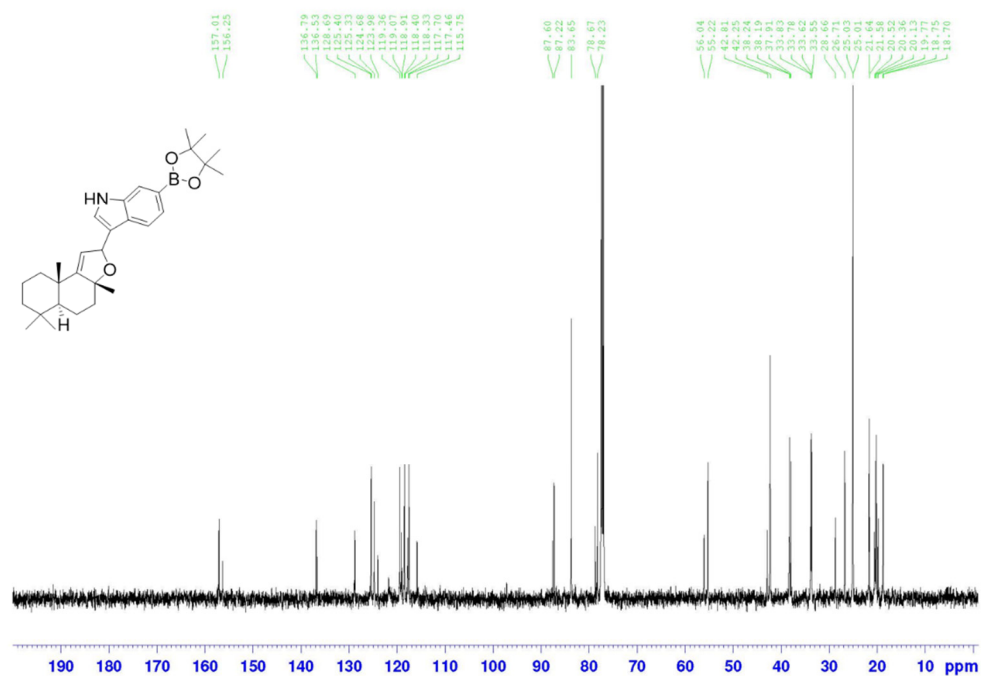

<sup>13</sup>C NMR of Compound 8v

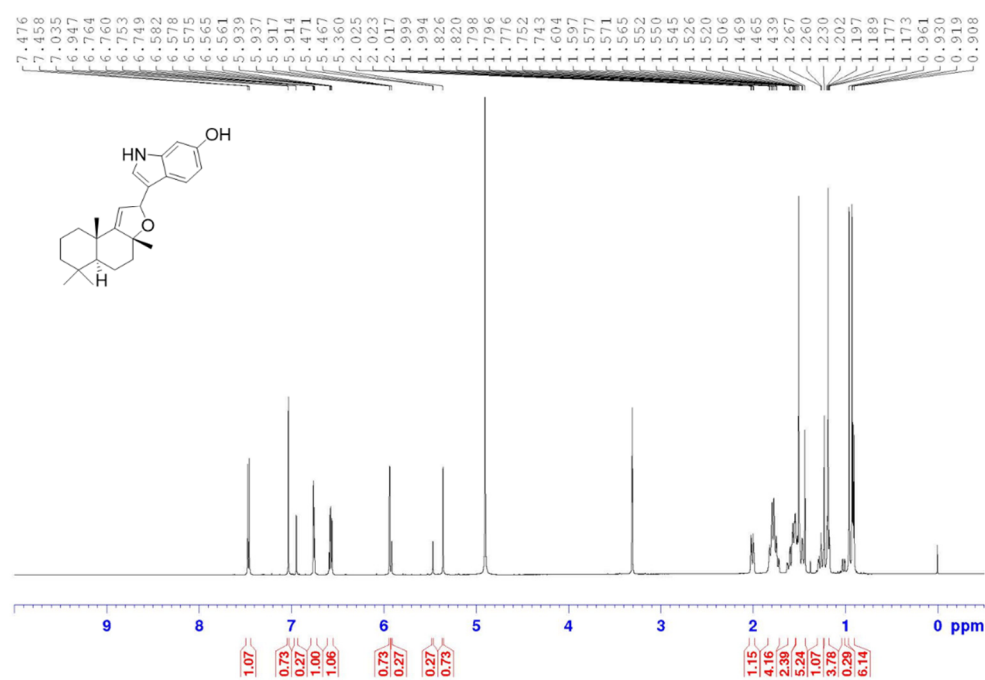

<sup>1</sup>H NMR of Compound **8w**

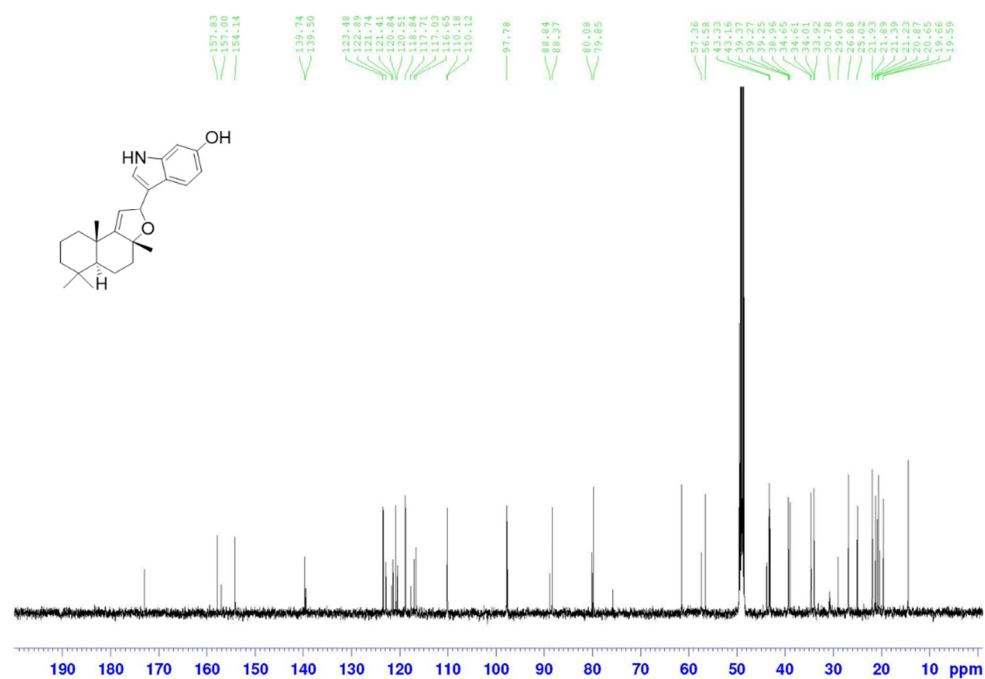

<sup>13</sup>C NMR of Compound **8w**

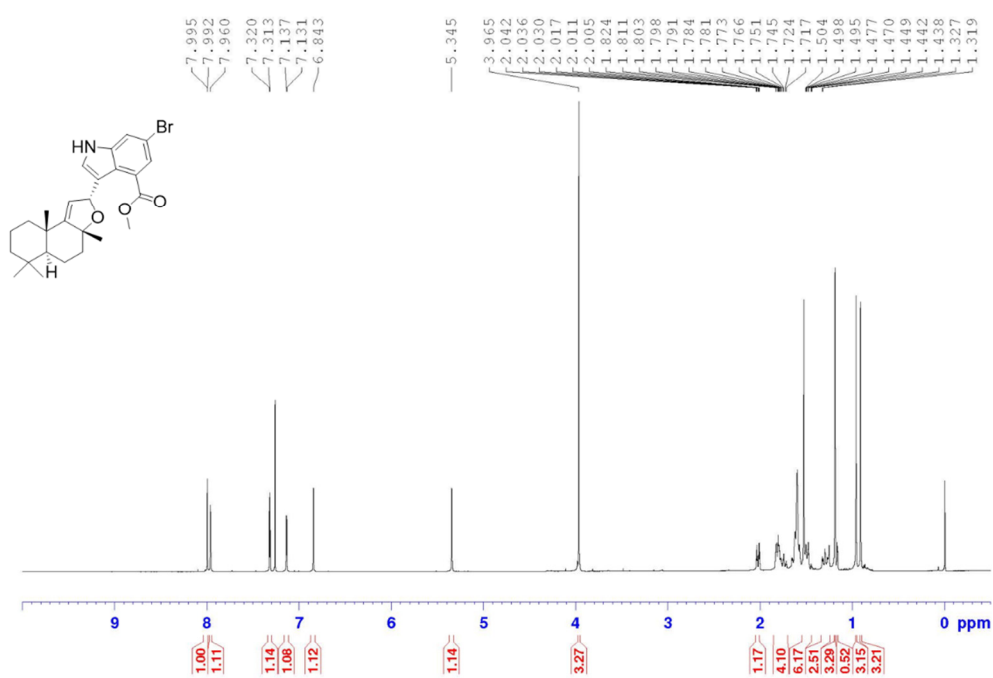

<sup>1</sup>H NMR of Compound **8x**

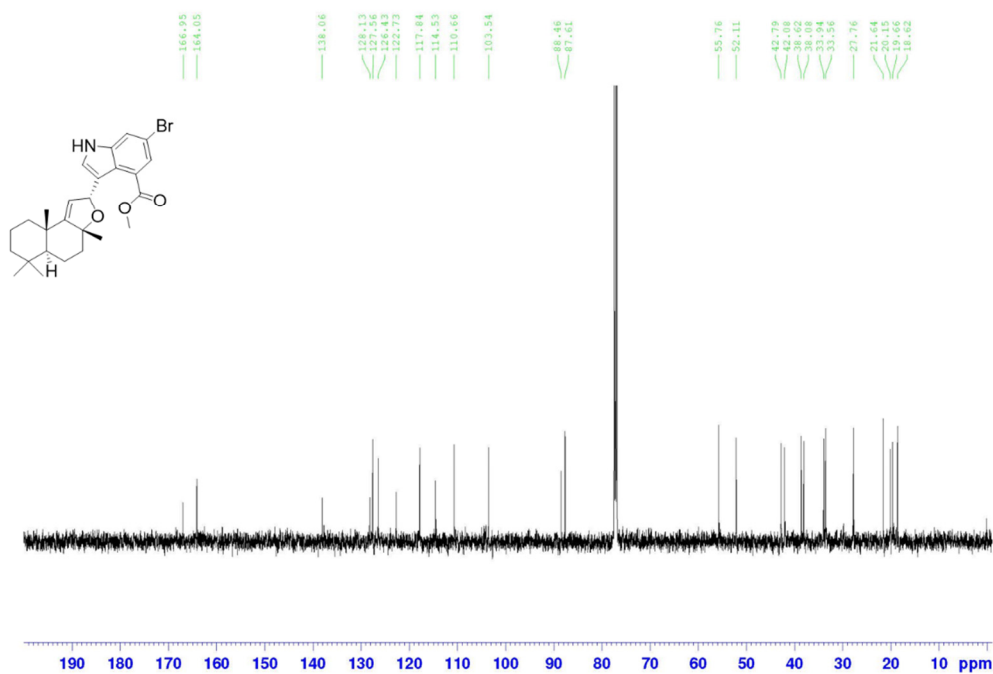

<sup>13</sup>C NMR of Compound **8x**

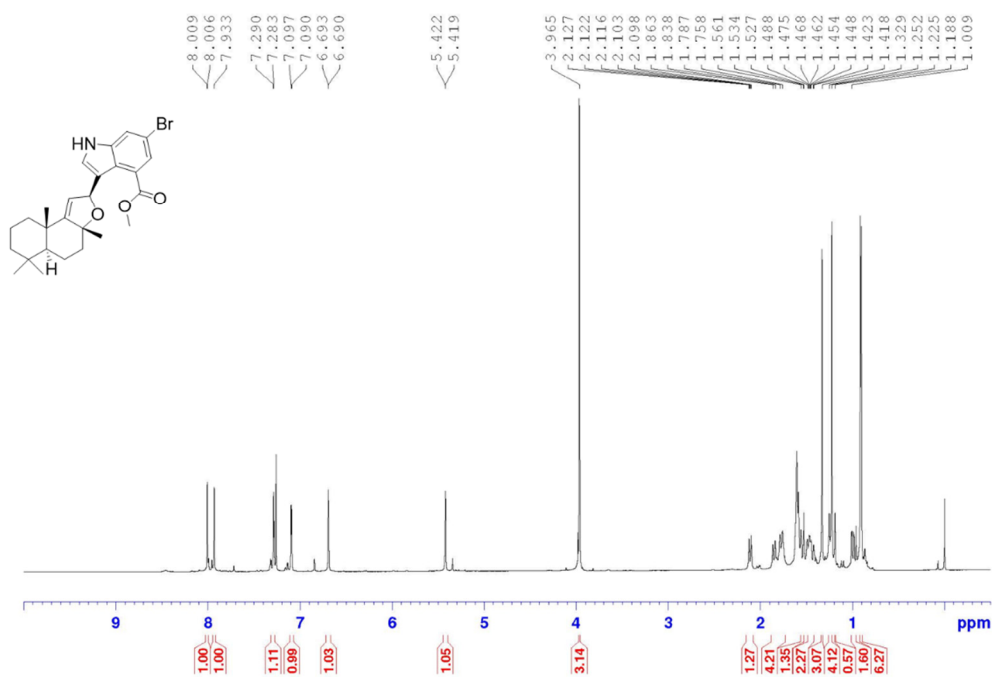

<sup>1</sup>H NMR of Compound 8x'

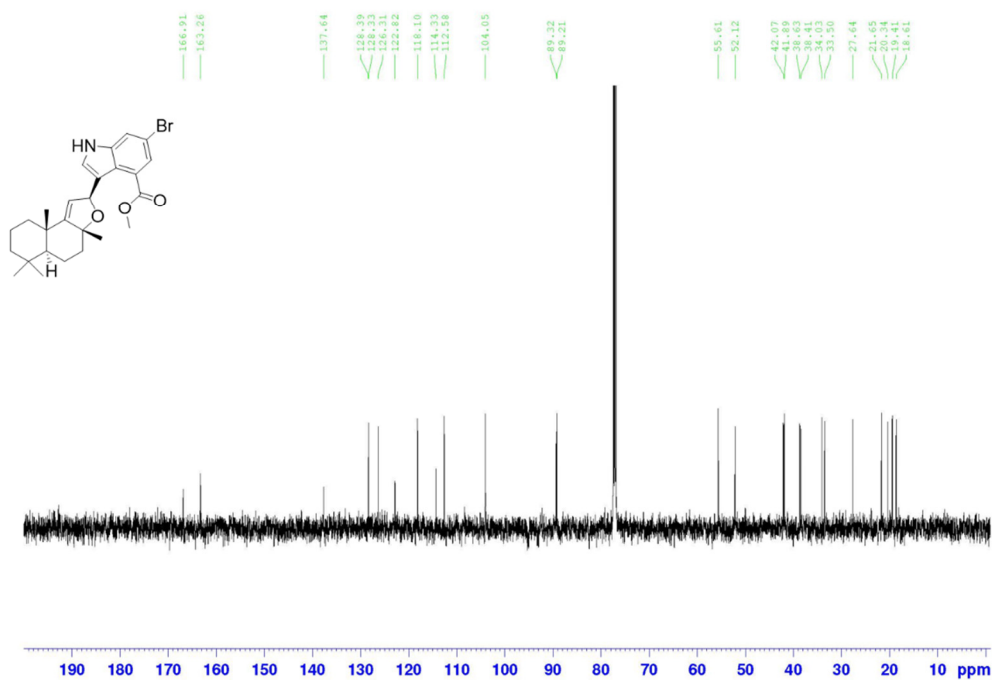

<sup>13</sup>C NMR of Compound 8x'

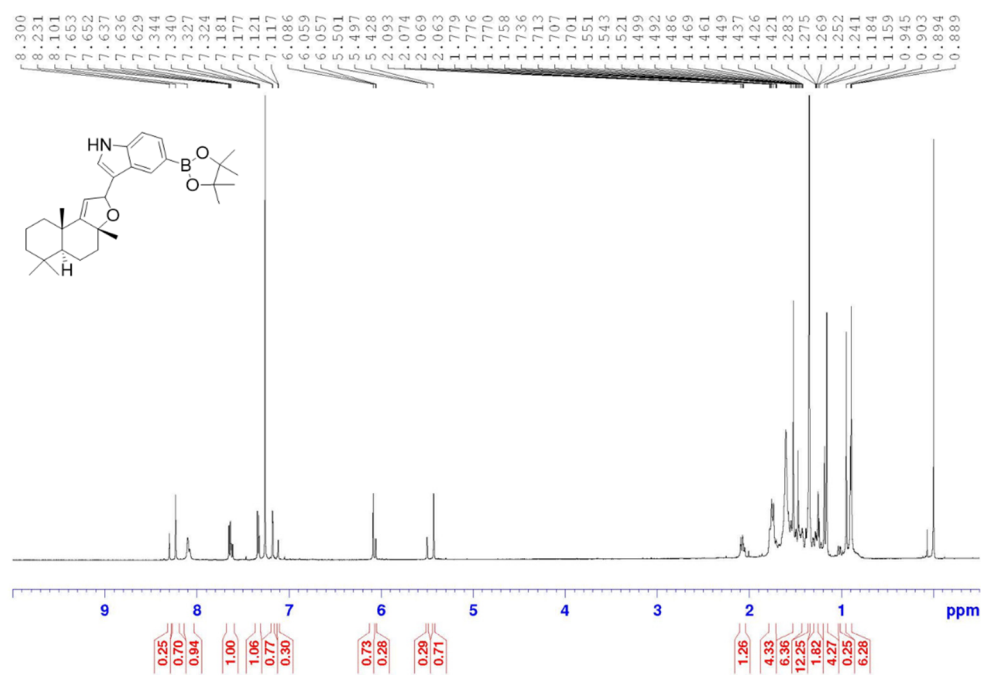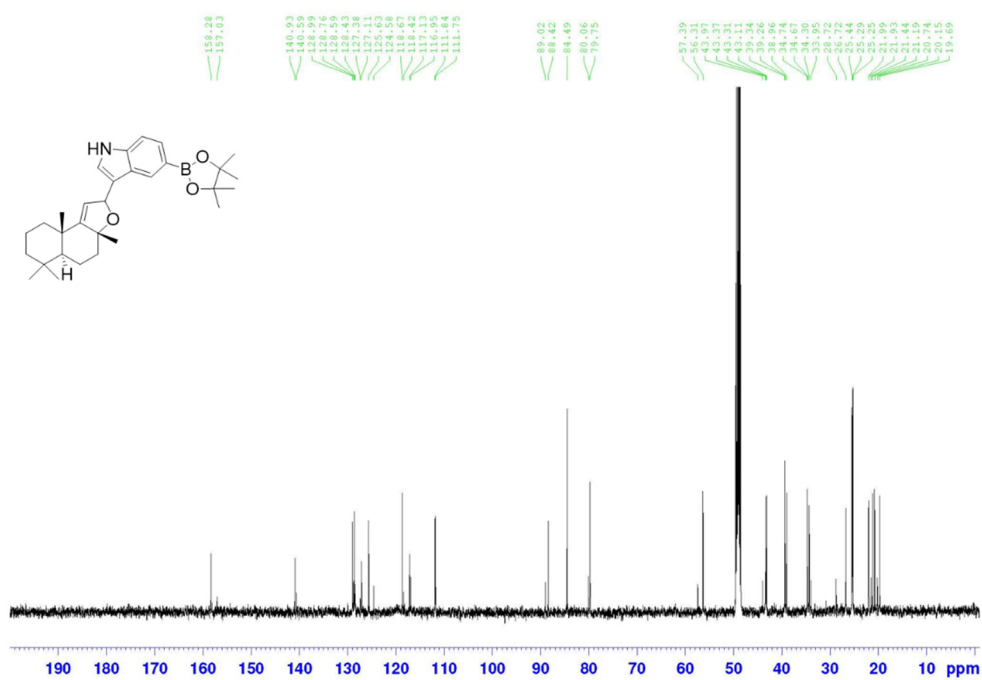

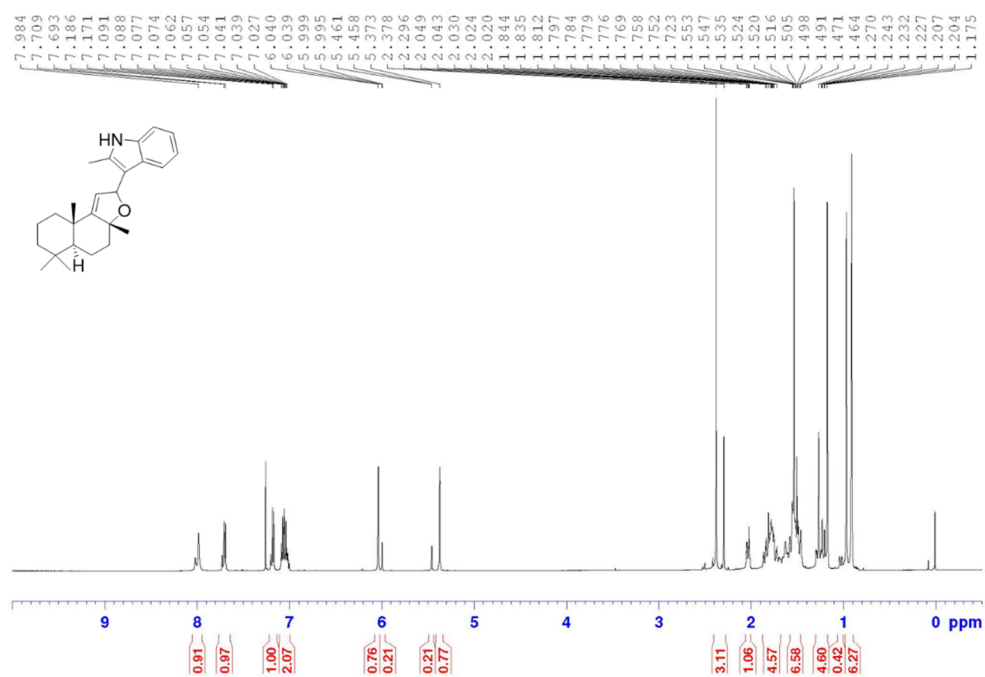

**<sup>1</sup>H NMR of Compound 8ab**

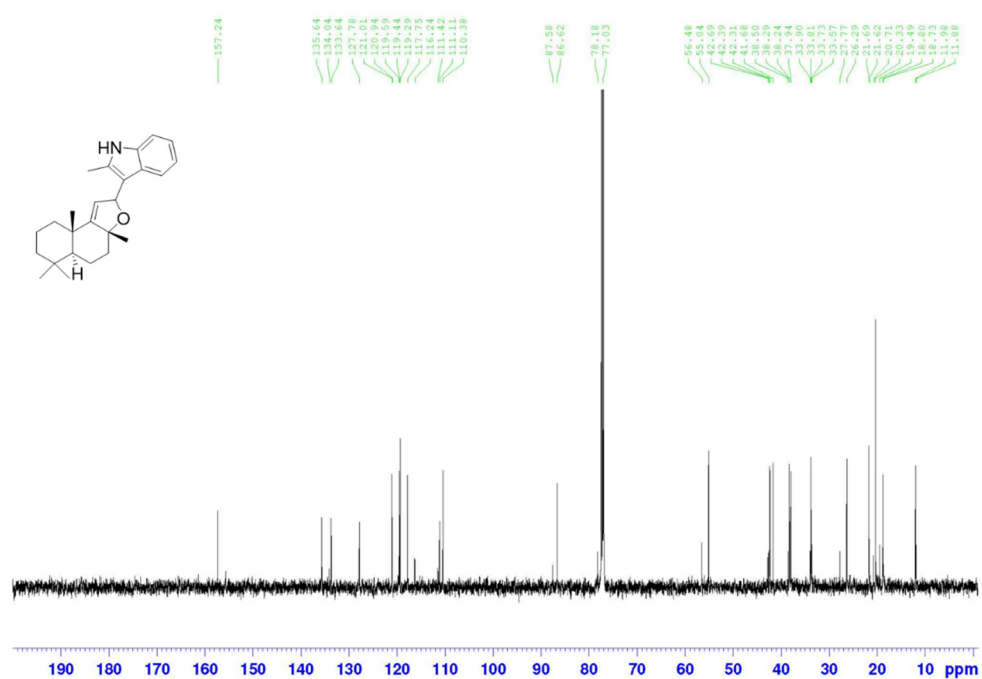

**<sup>13</sup>C NMR of Compound 8ab**



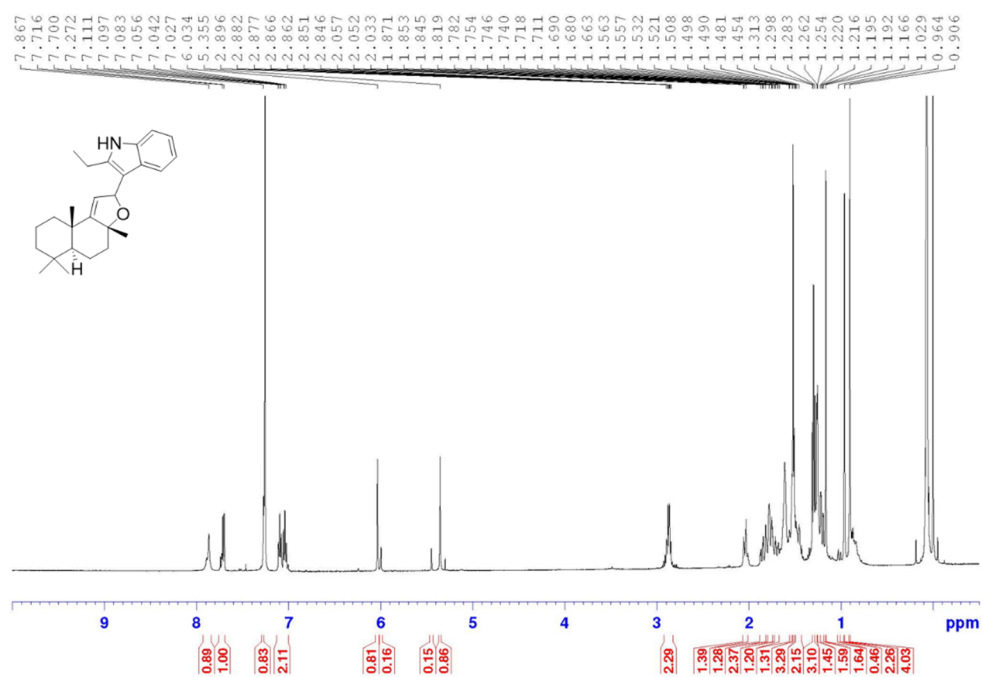

**<sup>1</sup>H NMR of Compound 8ac**

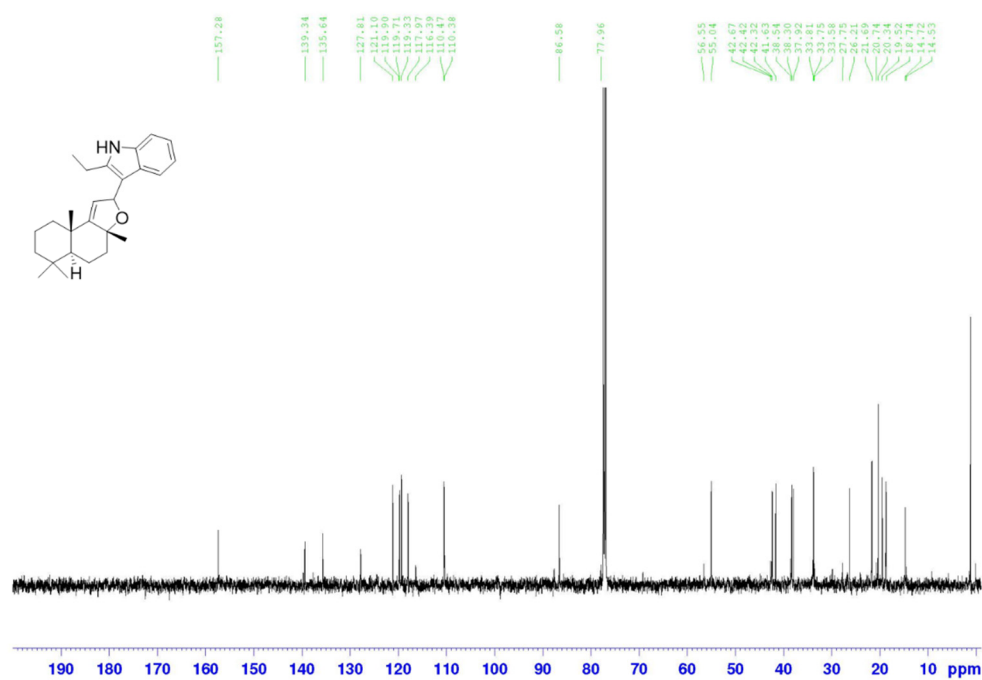

**<sup>13</sup>C NMR of Compound 8ac**

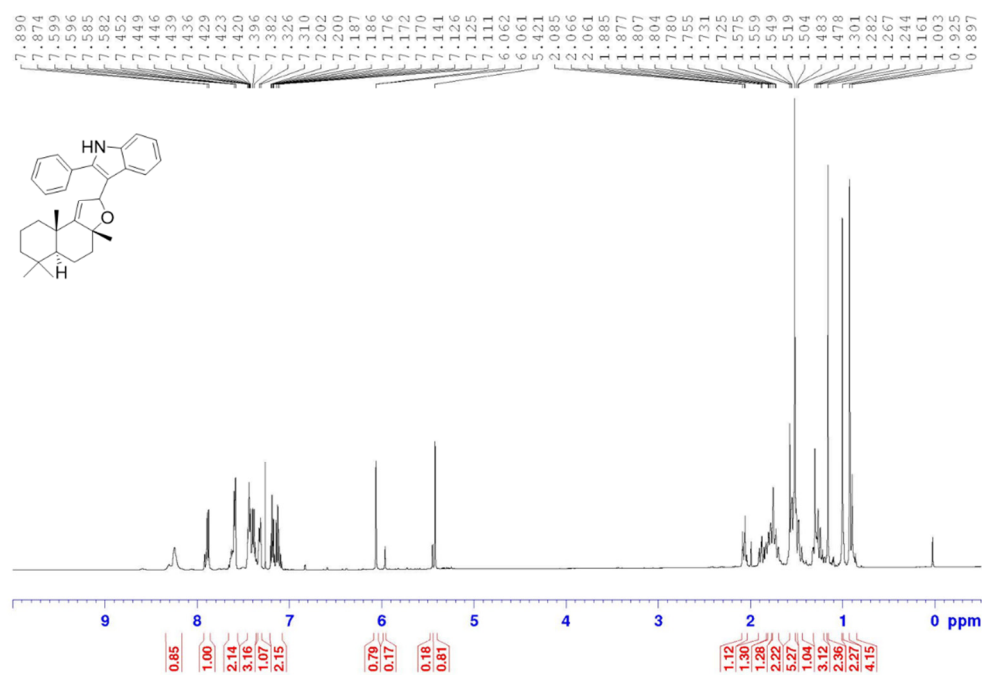

$^1\text{H}$  NMR of Compound **8ad**

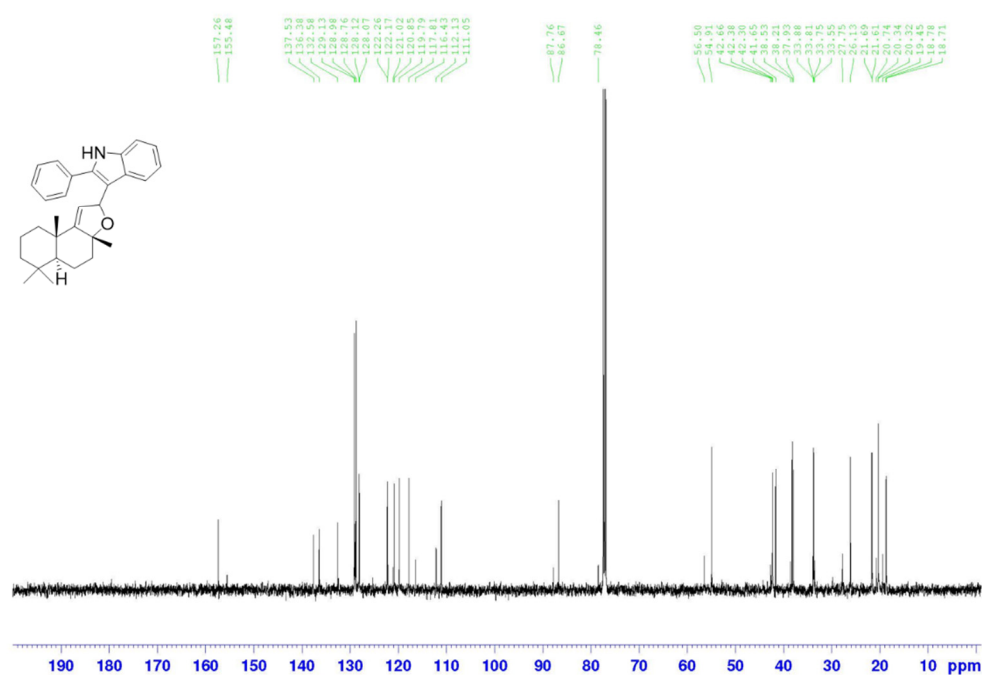

$^{13}\text{C}$  NMR of Compound **8ad**

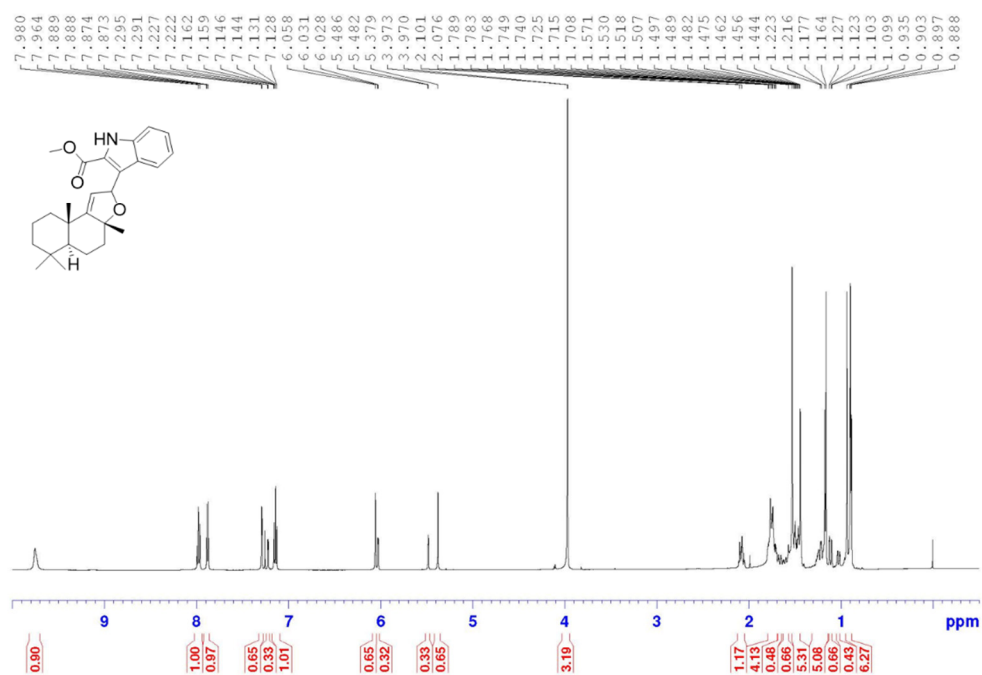

<sup>1</sup>H NMR of Compound **8ae**

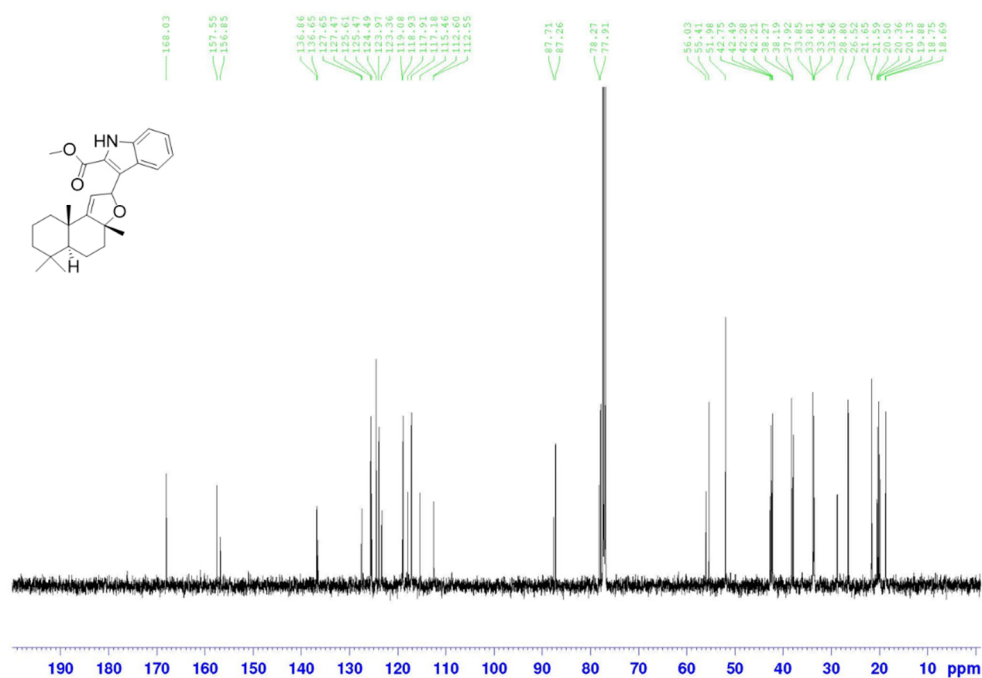

<sup>13</sup>C NMR of Compound **8ae**

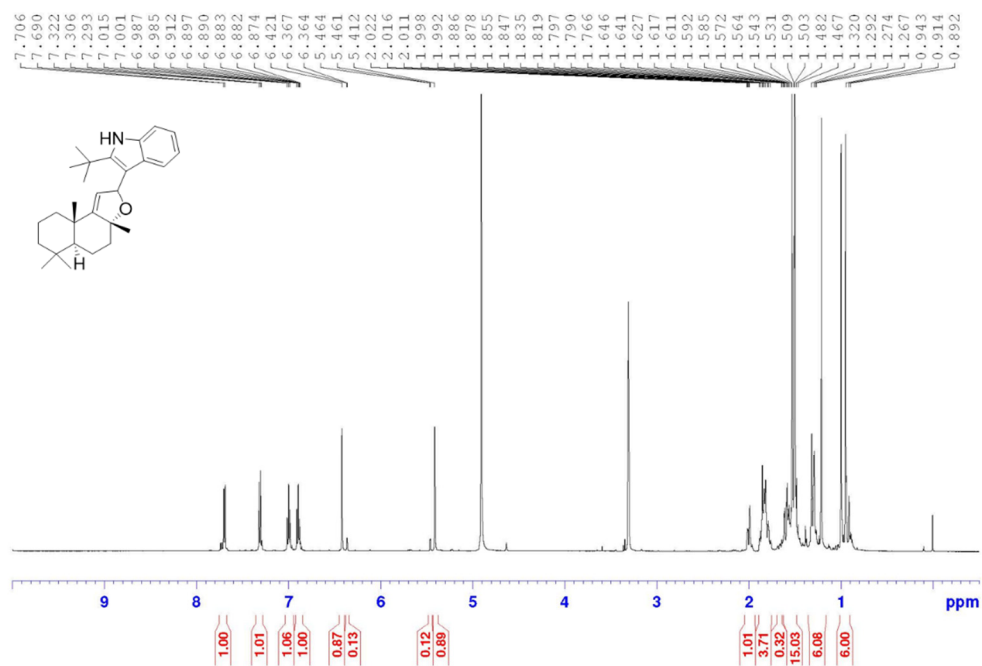

<sup>1</sup>H NMR of Compound **8af**

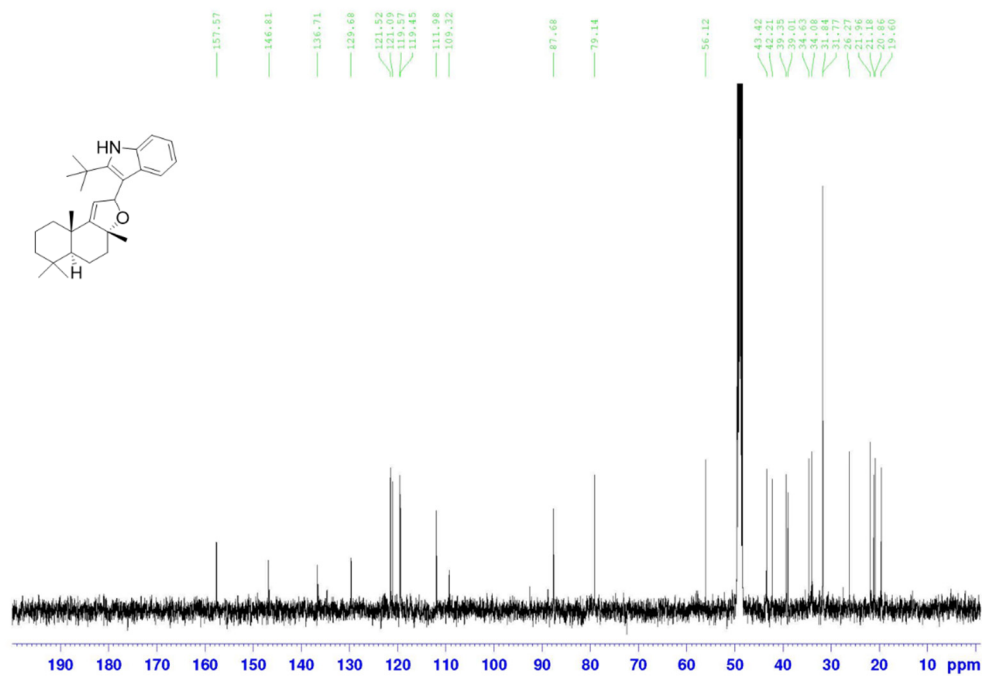

<sup>13</sup>C NMR of Compound **8af**

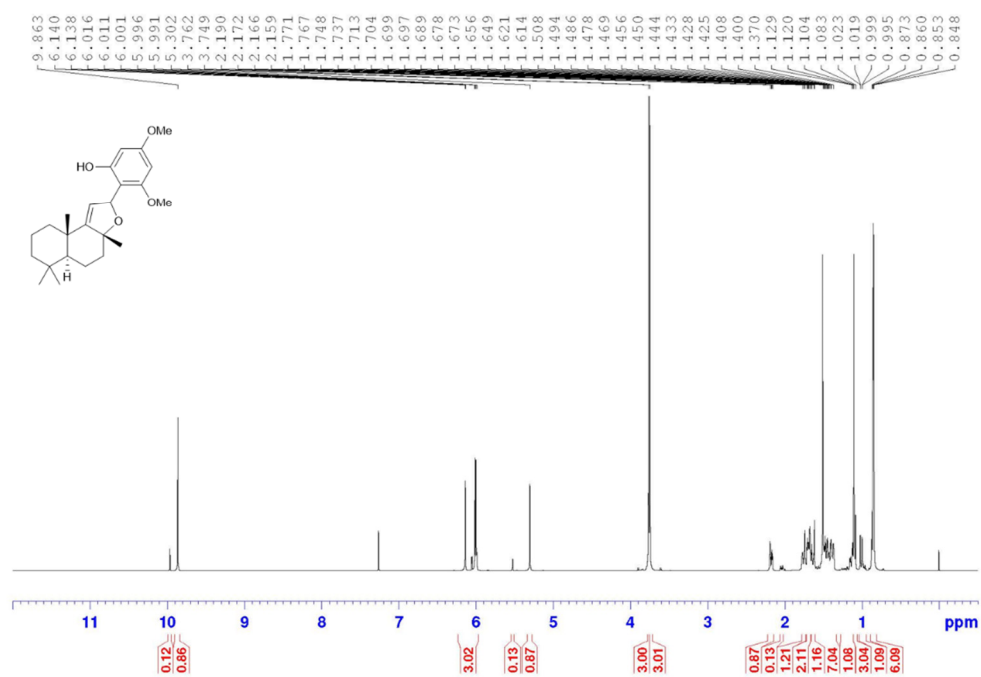

**<sup>1</sup>H NMR of Compound 9**

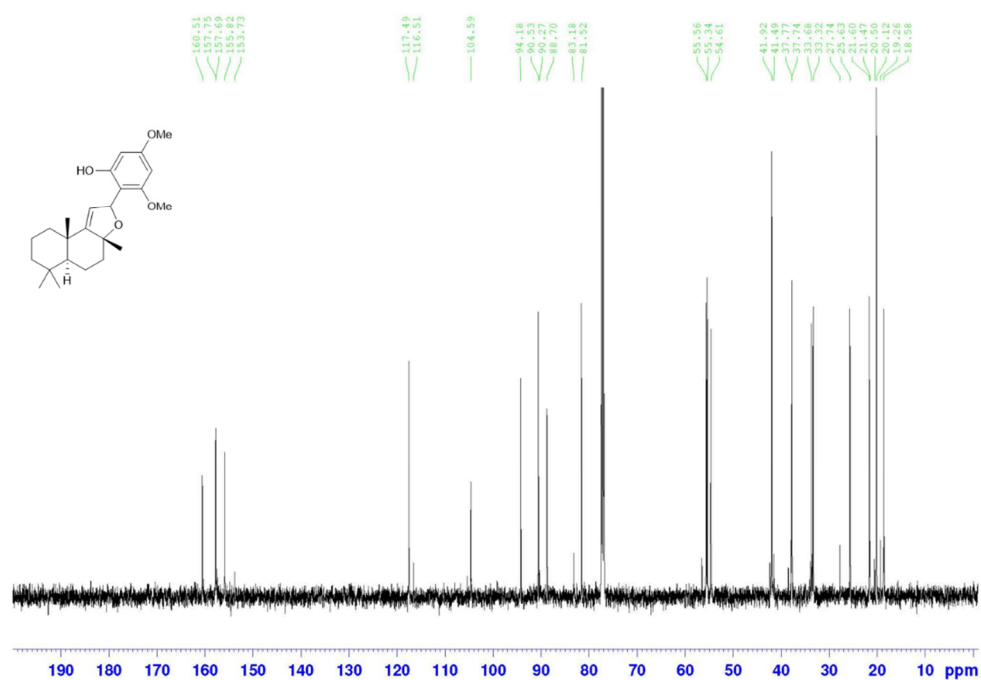

**<sup>13</sup>C NMR of Compound 9**

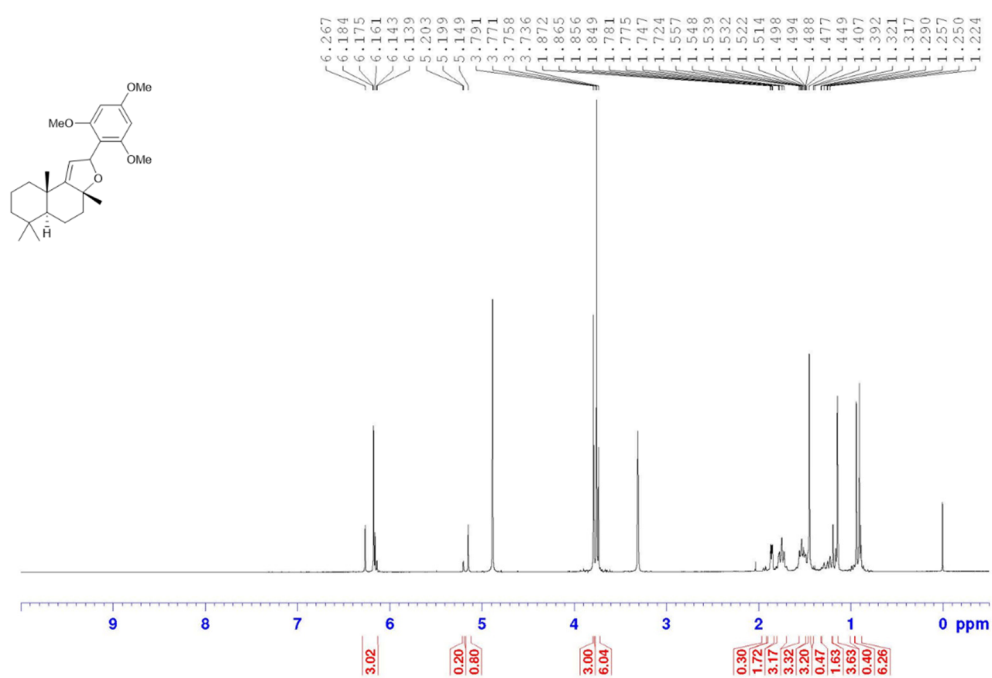

<sup>1</sup>H NMR of Compound 10

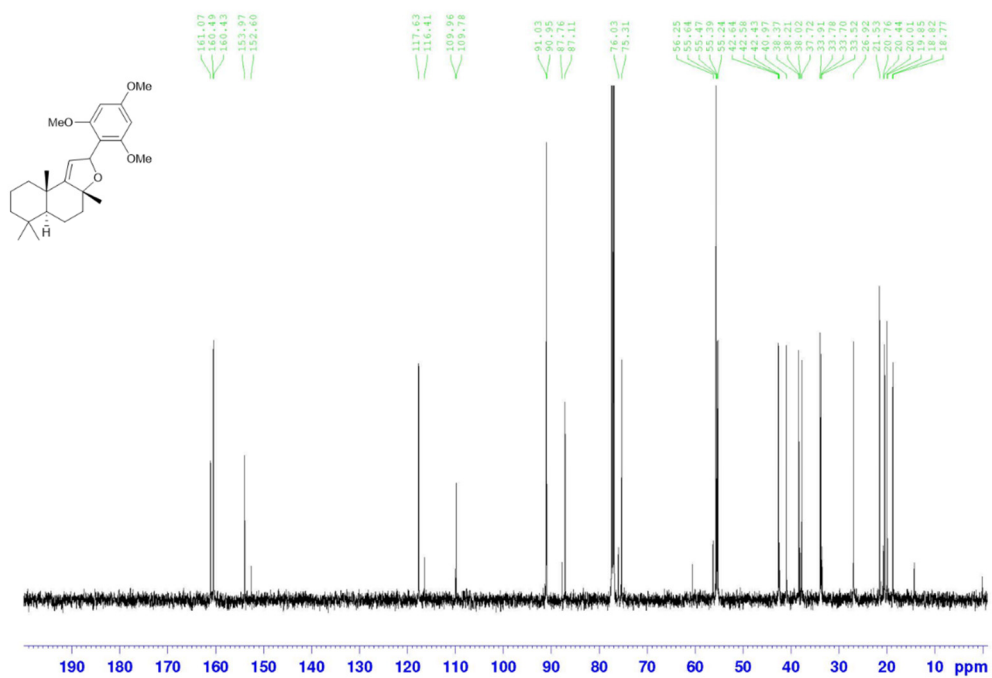

<sup>13</sup>C NMR of Compound 10

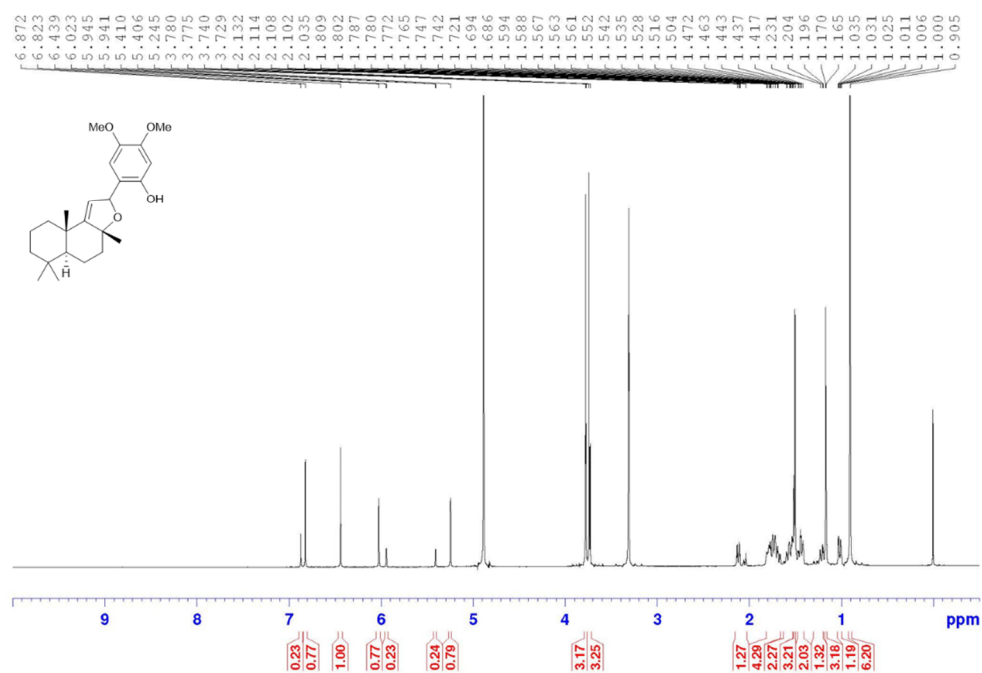

<sup>1</sup>H NMR of Compound 11

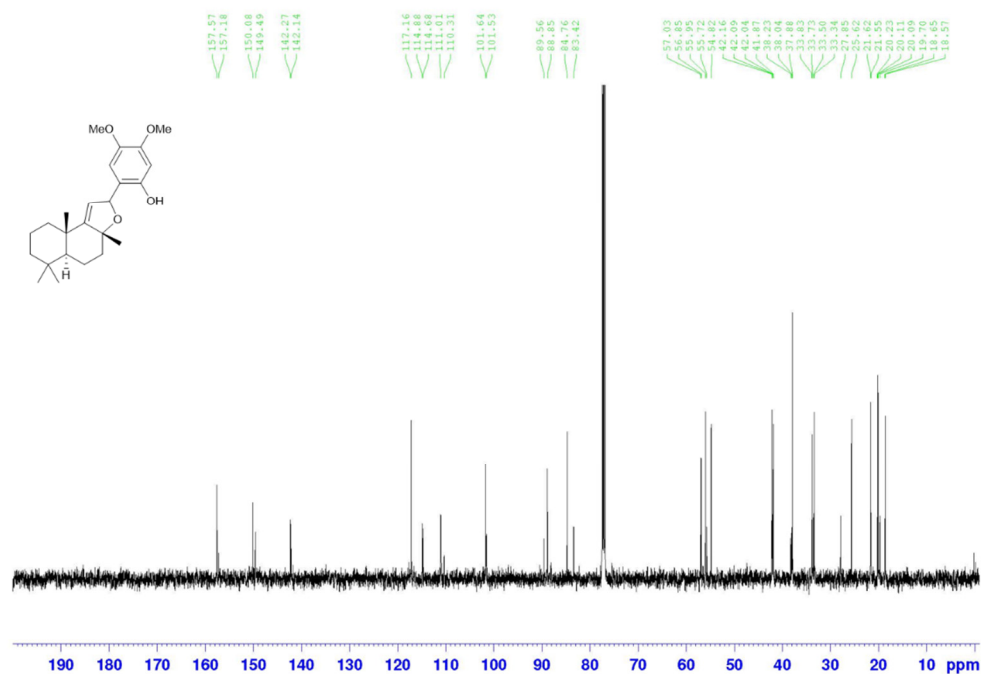

<sup>13</sup>C NMR of Compound 11

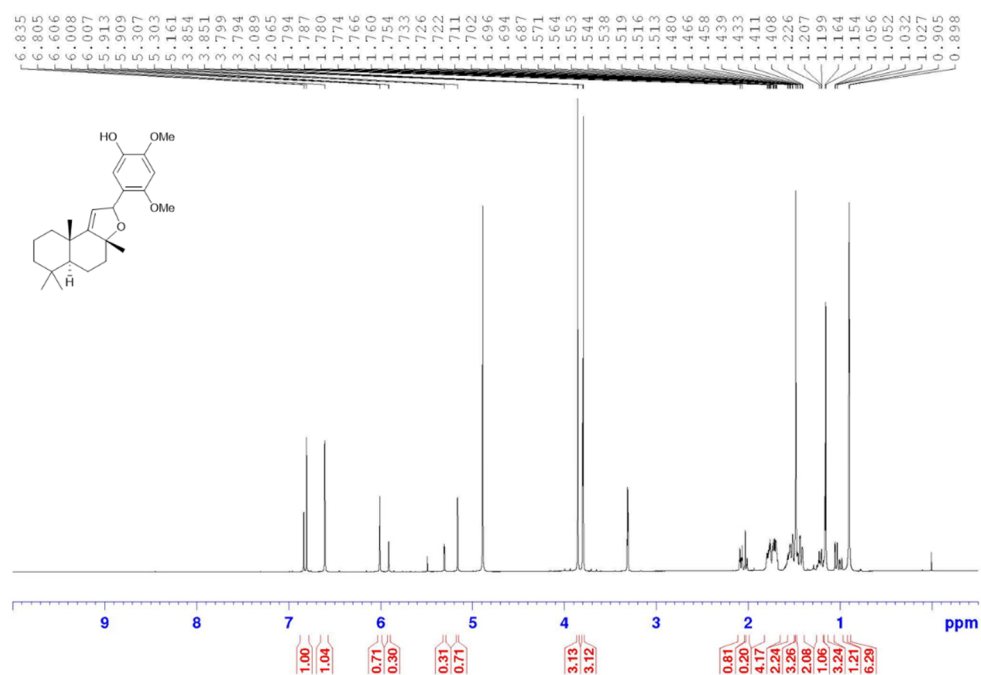

<sup>1</sup>H NMR of Compound 12

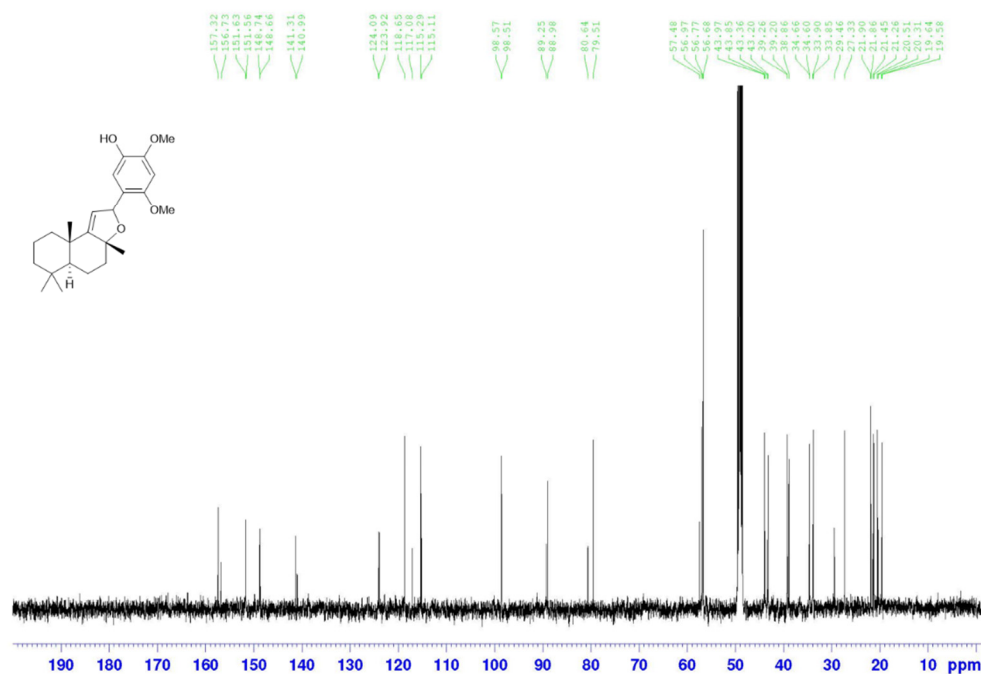

<sup>13</sup>C NMR of Compound 12



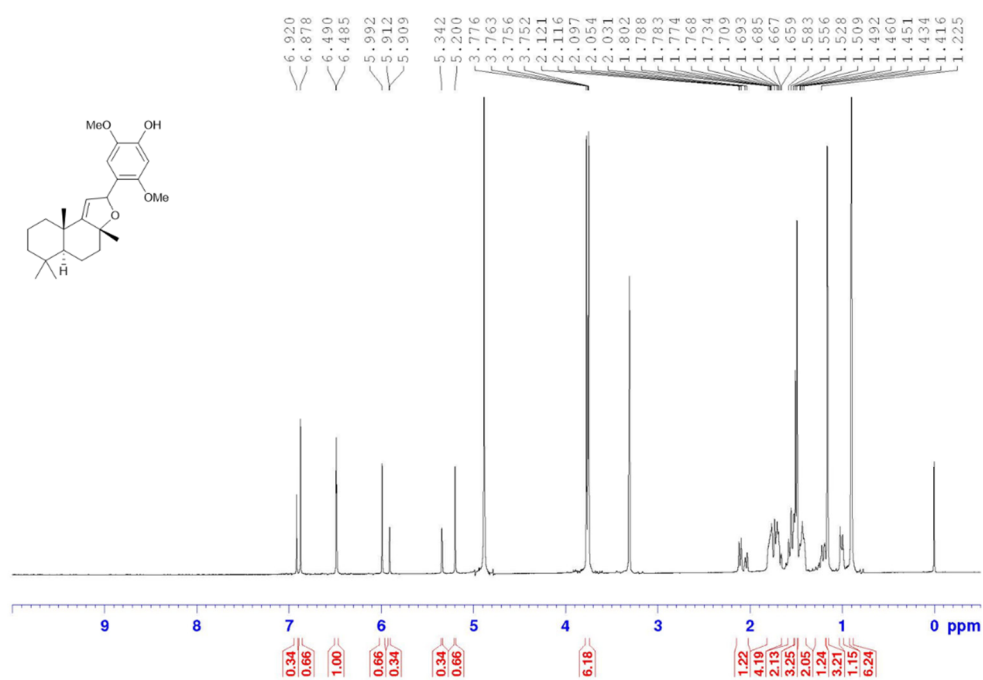

<sup>1</sup>H NMR of Compound 13

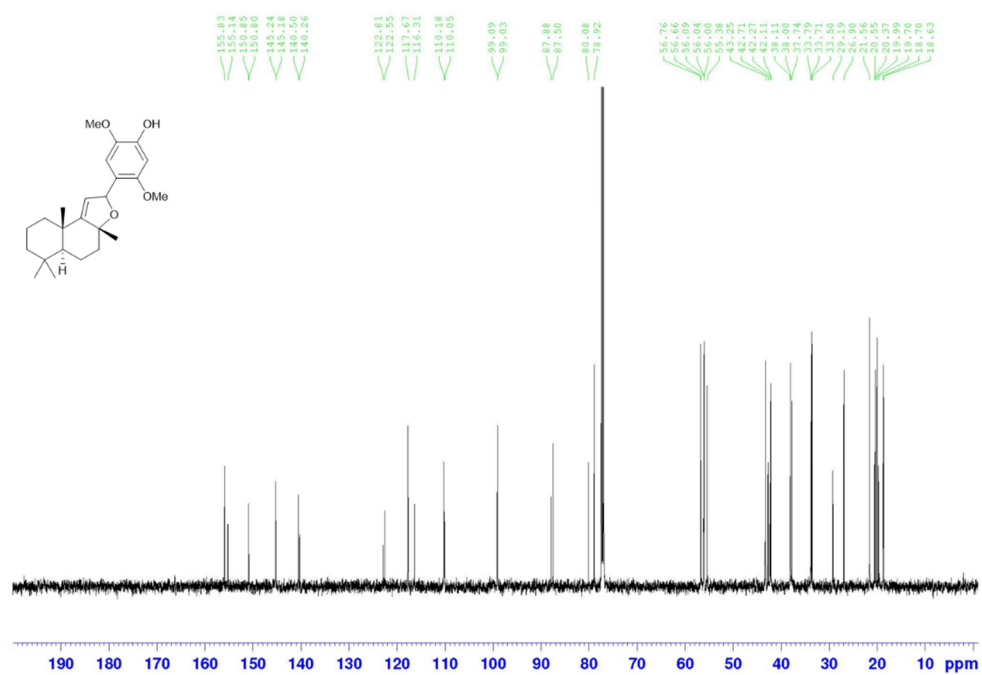

<sup>13</sup>C NMR of Compound 13

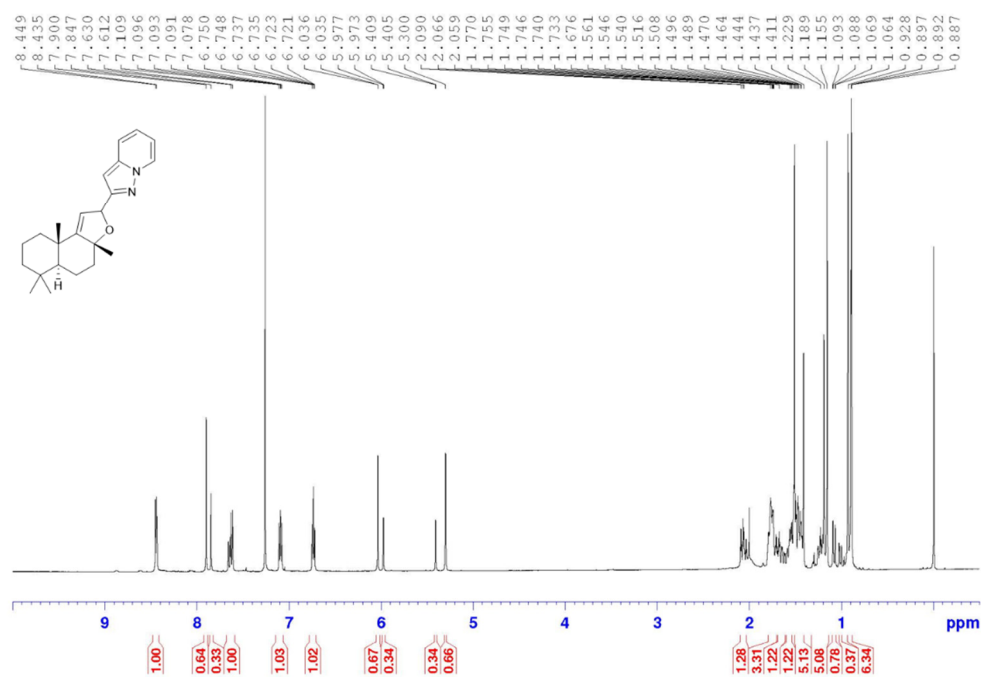

<sup>1</sup>H NMR of Compound 14

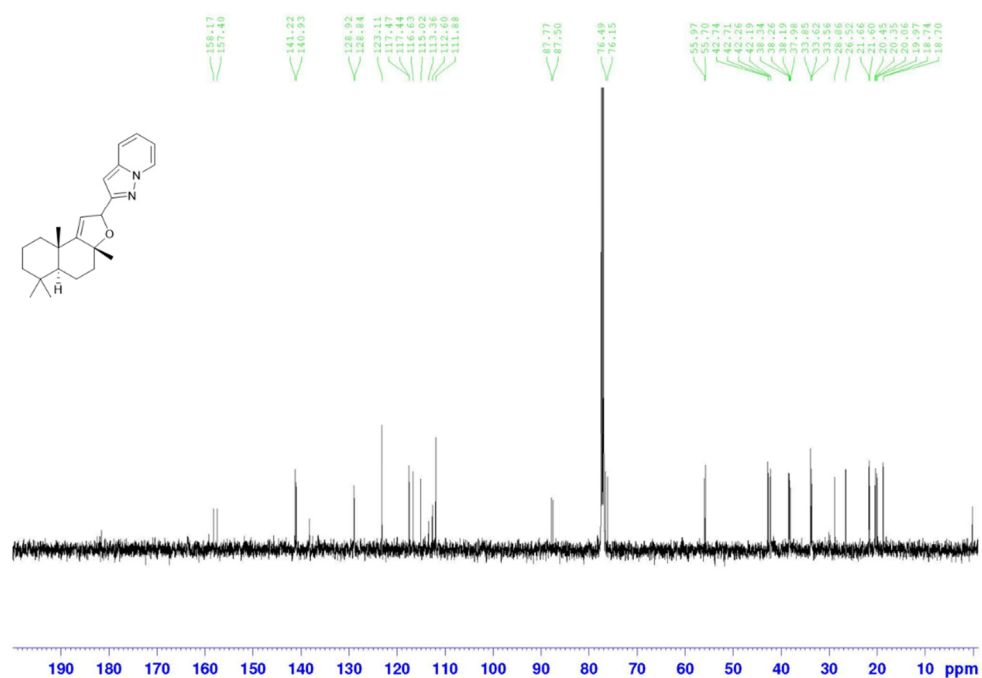

<sup>13</sup>C NMR of Compound 14

## 4. Original HRMS spectra of final compounds

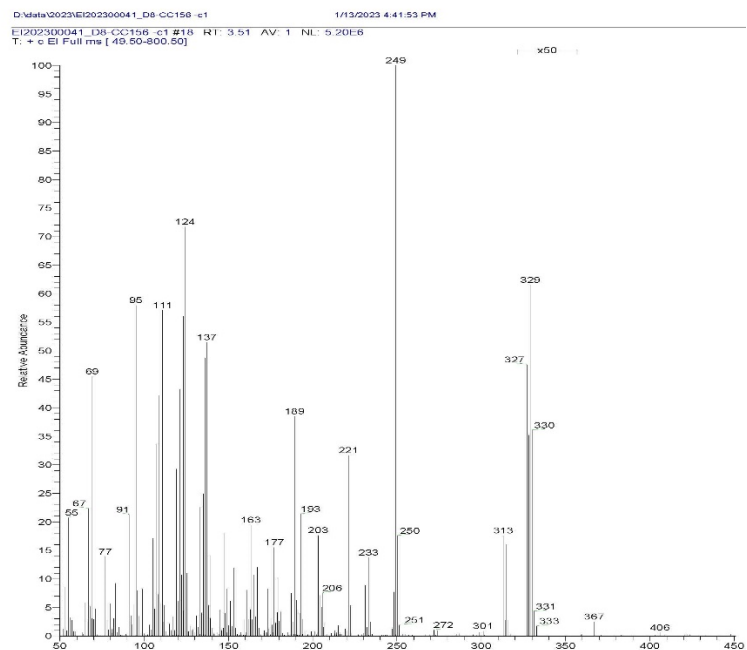

D:\data\2023\EI202300041\_D8-CC156 -c1 1/13/2023 4:41:53 PM  
EI202300041\_D8-CC156 -c1#23 RT: 4.54  
T: + c EI Full ms [49.50-800.50]  
m/z= 48-803

| m/z      | Intensity | Relative | Theo. Mass | Delta (mmu) | RDB equiv. | Composition                                                                  |
|----------|-----------|----------|------------|-------------|------------|------------------------------------------------------------------------------|
| 192.1486 | 55273.0   | 0.85     | 192.1509   | -2.28       | 4.0        | C <sub>13</sub> H <sub>20</sub> O <sub>1</sub>                               |
| 193.1223 | 1446179.0 | 22.23    | 193.1223   | -0.01       | 4.5        | C <sub>12</sub> H <sub>17</sub> O <sub>2</sub>                               |
| 194.1259 | 189459.0  | 2.91     | 194.1301   | -4.24       | 4.0        | C <sub>12</sub> H <sub>18</sub> O <sub>2</sub>                               |
| 203.1803 | 1090244.0 | 16.76    | 203.1794   | 0.88        | 4.5        | C <sub>15</sub> H <sub>23</sub>                                              |
| 203.9787 | 491208.0  | 7.55     | 203.9780   | 0.68        | 3.0        | C <sub>7</sub> H <sub>9</sub> O <sub>2</sub> <sup>79</sup> Br <sub>1</sub>   |
| 204.1843 | 193431.0  | 2.97     | 204.1873   | -2.91       | 4.0        | C <sub>15</sub> H <sub>24</sub>                                              |
| 205.1228 | 281918.0  | 4.33     | 205.1223   | 0.52        | 5.5        | C <sub>13</sub> H <sub>17</sub> O <sub>2</sub>                               |
| 205.1597 | 283469.0  | 4.36     | 205.1587   | 1.01        | 4.5        | C <sub>14</sub> H <sub>21</sub> O <sub>1</sub>                               |
| 205.9771 | 492106.0  | 7.56     | 205.9726   | 4.52        | 7.0        | C <sub>10</sub> H <sub>7</sub> <sup>79</sup> Br <sub>1</sub>                 |
| 206.1276 | 60551.0   | 0.93     | 206.1301   | -2.53       | 5.0        | C <sub>13</sub> H <sub>18</sub> O <sub>2</sub>                               |
| 206.1653 | 75185.0   | 1.16     | 206.1665   | -1.25       | 4.0        | C <sub>14</sub> H <sub>22</sub> O <sub>1</sub>                               |
| 207.1383 | 133614.0  | 2.05     | 207.1380   | 0.34        | 4.5        | C <sub>13</sub> H <sub>19</sub> O <sub>2</sub>                               |
| 207.1754 | 63488.0   | 0.98     | 207.1743   | 1.08        | 3.5        | C <sub>14</sub> H <sub>23</sub> O <sub>1</sub>                               |
| 213.1621 | 77116.0   | 1.19     | 213.1638   | -1.65       | 6.5        | C <sub>16</sub> H <sub>21</sub>                                              |
| 214.0334 | 62455.0   | 0.96     | 214.0352   | -1.77       | 3.0        | C <sub>10</sub> H <sub>15</sub> <sup>79</sup> Br <sub>1</sub>                |
| 215.1426 | 104862.0  | 1.61     | 215.1430   | -0.44       | 6.5        | C <sub>15</sub> H <sub>19</sub> O <sub>1</sub>                               |
| 219.1377 | 79537.0   | 1.22     | 219.1380   | -0.27       | 5.5        | C <sub>14</sub> H <sub>19</sub> O <sub>2</sub>                               |
| 220.1820 | 61693.0   | 0.95     | 220.1822   | -0.20       | 4.0        | C <sub>15</sub> H <sub>24</sub> O <sub>1</sub>                               |
| 221.1895 | 1955857.0 | 30.06    | 221.1900   | -0.51       | 3.5        | C <sub>15</sub> H <sub>25</sub> O <sub>1</sub>                               |
| 222.1932 | 317063.0  | 4.87     | 222.1978   | -4.62       | 3.0        | C <sub>15</sub> H <sub>26</sub> O <sub>1</sub>                               |
| 231.1749 | 545693.0  | 8.39     | 231.1743   | 0.58        | 5.5        | C <sub>16</sub> H <sub>23</sub> O <sub>1</sub>                               |
| 233.1533 | 900512.0  | 13.84    | 233.1536   | -0.26       | 5.5        | C <sub>15</sub> H <sub>21</sub> O <sub>2</sub>                               |
| 234.1568 | 146834.0  | 2.26     | 234.1614   | -4.64       | 5.0        | C <sub>15</sub> H <sub>22</sub> O <sub>2</sub>                               |
| 247.1693 | 88296.0   | 1.36     | 247.1693   | 0.01        | 5.5        | C <sub>16</sub> H <sub>23</sub> O <sub>2</sub>                               |
| 248.1769 | 483292.0  | 7.43     | 248.1771   | -0.17       | 5.0        | C <sub>16</sub> H <sub>24</sub> O <sub>2</sub>                               |
| 249.1840 | 6505997.0 | 100.00   | 249.1849   | -0.90       | 4.5        | C <sub>16</sub> H <sub>25</sub> O <sub>2</sub>                               |
| 272.0412 | 63379.0   | 0.97     | 272.0406   | 0.60        | 4.0        | C <sub>12</sub> H <sub>17</sub> O <sub>2</sub> <sup>79</sup> Br <sub>1</sub> |
| 274.0395 | 64821.0   | 1.00     | 274.0352   | 4.30        | 8.0        | C <sub>15</sub> H <sub>15</sub> <sup>79</sup> Br <sub>1</sub>                |
| 299.1005 | 76654.0   | 1.18     | 299.1005   | 0.02        | 3.5        | C <sub>15</sub> H <sub>24</sub> O <sub>1</sub> <sup>79</sup> Br <sub>1</sub> |
| 313.0787 | 1109884.0 | 17.06    | 313.0798   | -1.11       | 4.5        | C <sub>15</sub> H <sub>22</sub> O <sub>2</sub> <sup>79</sup> Br <sub>1</sub> |
| 327.0976 | 76382.0   | 1.17     | 327.0954   | 2.18        | 4.5        | C <sub>16</sub> H <sub>24</sub> O <sub>2</sub> <sup>79</sup> Br <sub>1</sub> |
| 328.1033 | 72356.0   | 1.11     | 328.1032   | 0.08        | 4.0        | C <sub>16</sub> H <sub>25</sub> O <sub>2</sub> <sup>79</sup> Br <sub>1</sub> |

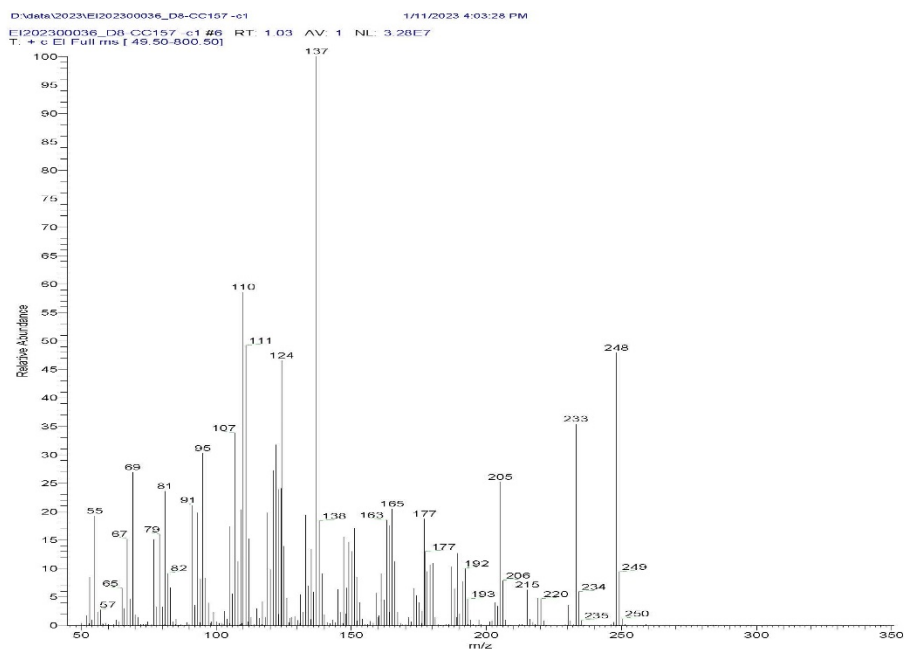

D:\data\2023\EI202300036\_D8-CC157 -c1

1/11/2023 4:03:28 PM

EI202300036\_D8-CC157 -c1#7 RT: 1.24

T: + c EI Full ms [ 49.50-800.50]

m/z= 48-803

| m/z      | Intensity  | Relative | Theo.<br>Mass | Delta<br>(mmu) | RDB<br>equiv. | Composition                                    |
|----------|------------|----------|---------------|----------------|---------------|------------------------------------------------|
| 69.0694  | 7841720.0  | 23.54    | 69.0699       | -0.43          | 1.5           | C <sub>5</sub> H <sub>9</sub>                  |
| 79.0178  | 5724953.0  | 17.19    | 79.0178       | -0.07          | 4.5           | C <sub>5</sub> H <sub>3</sub> O <sub>1</sub>   |
| 81.0309  | 7632278.0  | 22.91    | 81.0335       | -2.62          | 3.5           | C <sub>5</sub> H <sub>5</sub> O <sub>1</sub>   |
| 93.0699  | 7022084.0  | 21.08    | 93.0699       | -0.01          | 3.5           | C <sub>7</sub> H <sub>9</sub>                  |
| 95.0882  | 10181120.0 | 30.56    | 95.0855       | 2.69           | 2.5           | C <sub>7</sub> H <sub>11</sub>                 |
| 107.0114 | 11855872.0 | 35.59    | 107.0128      | -1.35          | 5.5           | C <sub>6</sub> H <sub>3</sub> O <sub>2</sub>   |
| 119.0859 | 7105937.0  | 21.33    | 119.0855      | 0.41           | 4.5           | C <sub>9</sub> H <sub>11</sub>                 |
| 133.1014 | 7173873.0  | 21.54    | 133.1012      | 0.23           | 4.5           | C <sub>10</sub> H <sub>13</sub>                |
| 135.0802 | 4855815.0  | 14.58    | 135.0804      | -0.24          | 4.5           | C <sub>9</sub> H <sub>11</sub> O <sub>1</sub>  |
| 135.1163 | 4151128.0  | 12.46    | 135.1168      | -0.50          | 3.5           | C <sub>10</sub> H <sub>15</sub>                |
| 137.0597 | 3366226.0  | 10.10    | 137.0597      | 0.04           | 4.5           | C <sub>8</sub> H <sub>9</sub> O <sub>2</sub>   |
| 137.1323 | 33312512.0 | 100.00   | 137.1325      | -0.18          | 2.5           | C <sub>10</sub> H <sub>17</sub>                |
| 138.0675 | 6449632.0  | 19.36    | 138.0675      | -0.06          | 4.0           | C <sub>8</sub> H <sub>10</sub> O <sub>2</sub>  |
| 147.1166 | 5863642.0  | 17.60    | 147.1168      | -0.26          | 4.5           | C <sub>11</sub> H <sub>15</sub>                |
| 149.0955 | 5249209.0  | 15.76    | 149.0961      | -0.58          | 4.5           | C <sub>10</sub> H <sub>13</sub> O <sub>1</sub> |
| 150.1033 | 4584152.0  | 13.76    | 150.1039      | -0.61          | 4.0           | C <sub>10</sub> H <sub>14</sub> O <sub>1</sub> |
| 151.0747 | 6188499.0  | 18.58    | 151.0754      | -0.67          | 4.5           | C <sub>9</sub> H <sub>11</sub> O <sub>2</sub>  |
| 161.1316 | 3497804.0  | 10.50    | 161.1325      | -0.85          | 4.5           | C <sub>12</sub> H <sub>17</sub>                |
| 163.0744 | 6643075.0  | 19.94    | 163.0754      | -0.92          | 5.5           | C <sub>10</sub> H <sub>11</sub> O <sub>2</sub> |
| 164.0822 | 6372780.0  | 19.13    | 164.0832      | -0.96          | 5.0           | C <sub>10</sub> H <sub>12</sub> O <sub>2</sub> |
| 165.0904 | 7375849.0  | 22.14    | 165.0910      | -0.65          | 4.5           | C <sub>10</sub> H <sub>13</sub> O <sub>2</sub> |
| 166.0982 | 4039433.0  | 12.13    | 166.0988      | -0.66          | 4.0           | C <sub>10</sub> H <sub>14</sub> O <sub>2</sub> |
| 177.0912 | 6759255.0  | 20.29    | 177.0910      | 0.21           | 5.5           | C <sub>11</sub> H <sub>13</sub> O <sub>2</sub> |
| 177.1275 | 3918111.0  | 11.76    | 177.1274      | 0.07           | 4.5           | C <sub>12</sub> H <sub>17</sub> O <sub>1</sub> |
| 177.1637 | 4858987.0  | 14.59    | 177.1638      | -0.11          | 3.5           | C <sub>13</sub> H <sub>21</sub>                |
| 178.0975 | 3575778.0  | 10.73    | 178.0988      | -1.31          | 5.0           | C <sub>11</sub> H <sub>14</sub> O <sub>2</sub> |
| 179.1059 | 3889613.0  | 11.68    | 179.1067      | -0.77          | 4.5           | C <sub>11</sub> H <sub>15</sub> O <sub>2</sub> |
| 180.1134 | 4005274.0  | 12.02    | 180.1145      | -1.05          | 4.0           | C <sub>11</sub> H <sub>16</sub> O <sub>2</sub> |
| 187.1476 | 3977842.0  | 11.94    | 187.1481      | -0.53          | 5.5           | C <sub>14</sub> H <sub>19</sub>                |
| 189.1631 | 5132837.0  | 15.41    | 189.1638      | -0.72          | 4.5           | C <sub>14</sub> H <sub>21</sub>                |
| 192.1135 | 3937775.0  | 11.82    | 192.1145      | -1.02          | 5.0           | C <sub>12</sub> H <sub>16</sub> O <sub>2</sub> |
| 205.1220 | 5151380.0  | 15.46    | 205.1223      | -0.27          | 5.5           | C <sub>13</sub> H <sub>17</sub> O <sub>2</sub> |
| 205.1584 | 9623552.0  | 28.89    | 205.1587      | -0.29          | 4.5           | C <sub>14</sub> H <sub>21</sub> O <sub>1</sub> |
| 233.1531 | 13518080.0 | 40.58    | 233.1536      | -0.49          | 5.5           | C <sub>15</sub> H <sub>21</sub> O <sub>2</sub> |
| 248.1758 | 21569280.0 | 64.75    | 248.1771      | -1.25          | 5.0           | C <sub>16</sub> H <sub>24</sub> O <sub>2</sub> |

## Qualitative Analysis Report

|                 |                                        |                        |                              |
|-----------------|----------------------------------------|------------------------|------------------------------|
| Data Filename   | ESI-H202205829.d                       | Sample Name            | D8-CD099                     |
| Sample ID       |                                        | Position               | P1-D6                        |
| Instrument Name | Agilent G6520 Q-TOF                    | Acq Method             | 20160322_MS_ESI-H_POS_1min.m |
| Acquired Time   | 12/21/2022 16:59:17                    | IRM Calibration Status | Success                      |
| DA Method       | small molecular data analysis method.m | Comment                | ESI-H by zhuzhenyun          |

### User Spectra

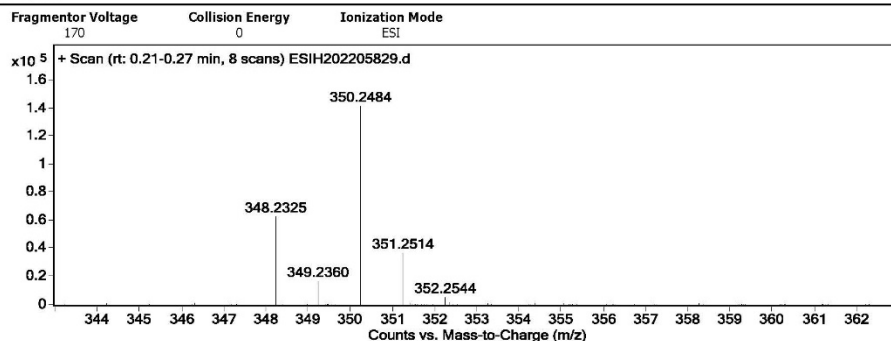

### Formula Calculator Results

| m/z      | Calc m/z | Diff (mDa) | Diff (ppm) | Ion Formula                         | Ion                |
|----------|----------|------------|------------|-------------------------------------|--------------------|
| 350.2484 | 350.2478 | -0.59      | -1.7       | C <sub>24</sub> H <sub>32</sub> N O | (M+H) <sup>+</sup> |

--- End Of Report ---

6

## Qualitative Analysis Report

|                 |                                        |                        |                              |
|-----------------|----------------------------------------|------------------------|------------------------------|
| Data Filename   | ESI-H202300067.d                       | Sample Name            | D8-CD127                     |
| Sample ID       |                                        | Position               | P1-A5                        |
| Instrument Name | Agilent G6520 Q-TOF                    | Acq Method             | 20160322_MS_ESI-H_POS_1min.m |
| Acquired Time   | 1/4/2023 10:41:59                      | IRM Calibration Status | Success                      |
| DA Method       | small molecular data analysis method.m | Comment                | ESI-H by fangsuo             |

### User Spectra

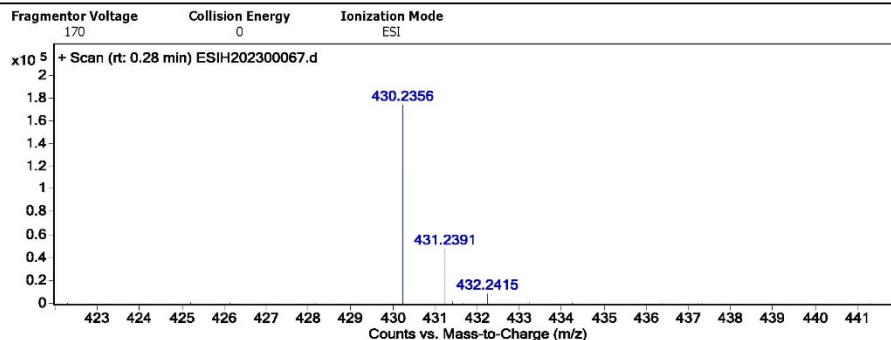

### Formula Calculator Results

| m/z      | Calc m/z | Diff (mDa) | Diff (ppm) | Ion Formula                                         | Ion                 |
|----------|----------|------------|------------|-----------------------------------------------------|---------------------|
| 430.2356 | 430.2353 | -0.34      | -0.79      | C <sub>26</sub> H <sub>33</sub> N Na O <sub>3</sub> | (M+Na) <sup>+</sup> |

--- End Of Report ---

8a

S73

## Qualitative Analysis Report

|                 |                                        |                        |                             |
|-----------------|----------------------------------------|------------------------|-----------------------------|
| Data Filename   | ESI202300063.d                         | Sample Name            | D8-CD129                    |
| Sample ID       |                                        | Position               | P1-A1                       |
| Instrument Name | Agilent G6520 Q-TOF                    | Acq Method             | 20160322_MS_ESIH_POS_1min.m |
| Acquired Time   | 1/4/2023 10:36:53                      | IRM Calibration Status | Success                     |
| DA Method       | small molecular data analysis method.m | Comment                | ESIH by fangsuo             |

### User Spectra

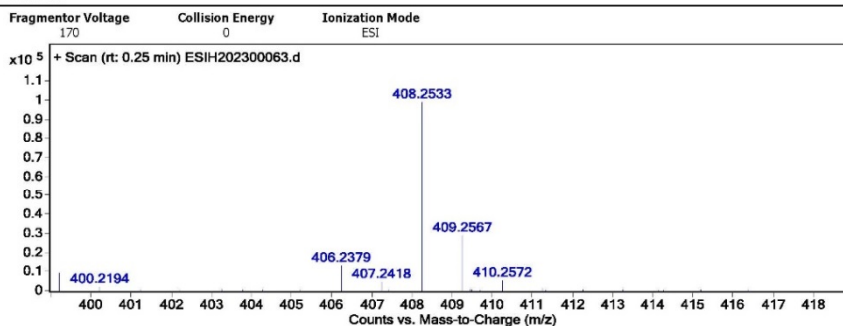

### Formula Calculator Results

| m/z      | Calc m/z | Diff (mDa) | Diff (ppm) | Ion Formula  | Ion    |
|----------|----------|------------|------------|--------------|--------|
| 408.2533 | 408.2533 | 0.01       | 0.02       | C26 H34 N O3 | (M+H)+ |

--- End Of Report ---

8b

## Qualitative Analysis Report

|                 |                                        |                        |                             |
|-----------------|----------------------------------------|------------------------|-----------------------------|
| Data Filename   | ESI202300006.d                         | Sample Name            | D8-CD130                    |
| Sample ID       |                                        | Position               | P1-A6                       |
| Instrument Name | Agilent G6520 Q-TOF                    | Acq Method             | 20160322_MS_ESIH_POS_1min.m |
| Acquired Time   | 1/3/2023 13:23:50                      | IRM Calibration Status | Success                     |
| DA Method       | small molecular data analysis method.m | Comment                | ESIH by fangsuo             |

### User Spectra

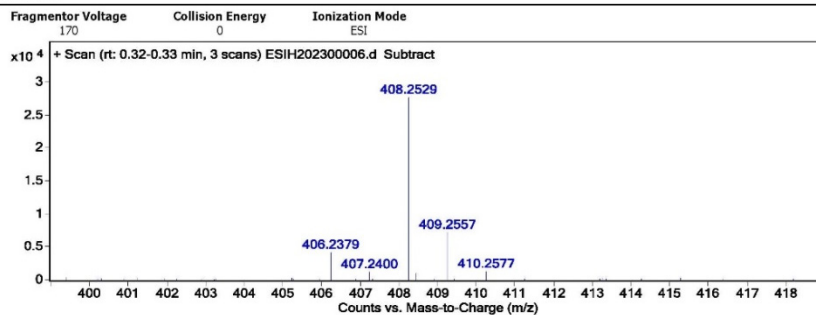

### Formula Calculator Results

| m/z      | Calc m/z | Diff (mDa) | Diff (ppm) | Ion Formula  | Ion    |
|----------|----------|------------|------------|--------------|--------|
| 408.2529 | 408.2533 | 0.42       | 1.02       | C26 H34 N O3 | (M+H)+ |

--- End Of Report ---

8c

## Qualitative Analysis Report

Data Filename: ESIH202300068.d  
Sample ID:   
Instrument Name: Agilent G6520 Q-TOF  
Acquired Time: 1/4/2023 10:43:16  
DA Method: small molecular data analysis method.m

Sample Name: D8-CD146  
Position: P1-A6  
Acq Method: 20160322\_MS\_ESIH\_POS\_1min.m  
IRM Calibration Status: Success  
Comment: ESIH by fangsuo

### User Spectra

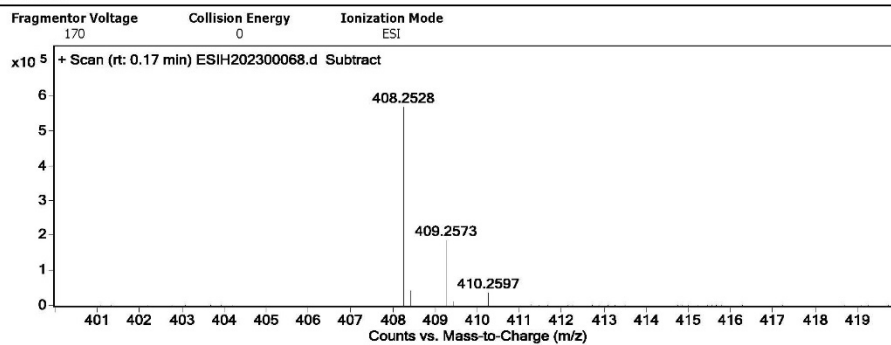

### Formula Calculator Results

| m/z      | Calc m/z | Diff (mDa) | Diff (ppm) | Ion Formula                                                   | Ion                |
|----------|----------|------------|------------|---------------------------------------------------------------|--------------------|
| 408.2528 | 408.2533 | 0.54       | 1.32       | C <sub>26</sub> H <sub>34</sub> N <sub>3</sub> O <sub>3</sub> | (M+H) <sup>+</sup> |

--- End Of Report ---

8d

## Qualitative Analysis Report

Data Filename: ESIH202300071.d  
Sample ID:   
Instrument Name: Agilent G6520 Q-TOF  
Acquired Time: 1/4/2023 10:47:05  
DA Method: small molecular data analysis method.m

Sample Name: D8-CD153  
Position: P1-A9  
Acq Method: 20160322\_MS\_ESIH\_POS\_1min.m  
IRM Calibration Status: Success  
Comment: ESIH by fangsuo

### User Spectra

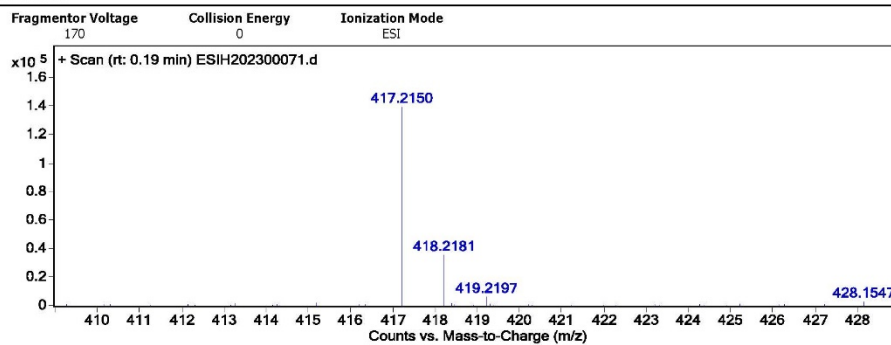

### Formula Calculator Results

| m/z     | Calc m/z | Diff (mDa) | Diff (ppm) | Ion Formula                                                     | Ion                 |
|---------|----------|------------|------------|-----------------------------------------------------------------|---------------------|
| 417.215 | 417.2149 | -0.15      | -0.36      | C <sub>24</sub> H <sub>30</sub> N <sub>2</sub> NaO <sub>3</sub> | (M+Na) <sup>+</sup> |

--- End Of Report ---

8e

S75

## Qualitative Analysis Report

|                        |                                        |                               |                             |
|------------------------|----------------------------------------|-------------------------------|-----------------------------|
| <b>Data Filename</b>   | ESI202300394.d                         | <b>Sample Name</b>            | D8-CD153-B                  |
| <b>Sample ID</b>       |                                        | <b>Position</b>               | P1-B9                       |
| <b>Instrument Name</b> | Agilent G6520 Q-TOF                    | <b>Acq Method</b>             | 20160322_MS_ESIH_POS_1min.m |
| <b>Acquired Time</b>   | 1/11/2023 13:38:14                     | <b>IRM Calibration Status</b> | Success                     |
| <b>DA Method</b>       | small molecular data analysis method.m | <b>Comment</b>                | ESIH by fangsu              |

### User Spectra

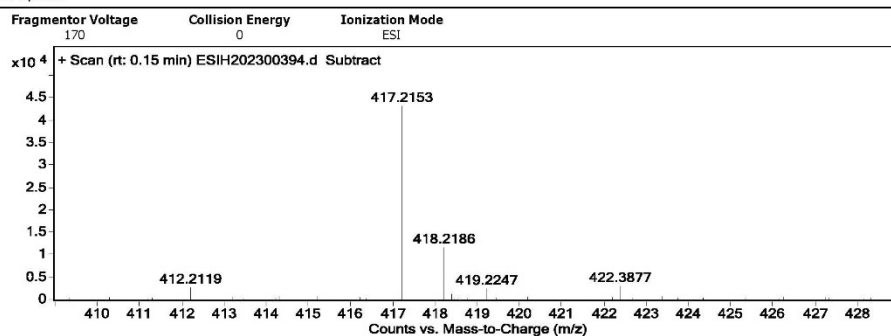

### Formula Calculator Results

| m/z      | Calc m/z | Diff (mDa) | Diff (ppm) | Ion Formula      | Ion     |
|----------|----------|------------|------------|------------------|---------|
| 417.2153 | 417.2149 | -0.47      | -1.12      | C24 H30 N2 Na O3 | (M+Na)+ |

--- End Of Report ---

8e'

## Qualitative Analysis Report

|                        |                                        |                               |                             |
|------------------------|----------------------------------------|-------------------------------|-----------------------------|
| <b>Data Filename</b>   | ESI202300069.d                         | <b>Sample Name</b>            | D8-CD149                    |
| <b>Sample ID</b>       |                                        | <b>Position</b>               | P1-A7                       |
| <b>Instrument Name</b> | Agilent G6520 Q-TOF                    | <b>Acq Method</b>             | 20160322_MS_ESIH_POS_1min.m |
| <b>Acquired Time</b>   | 1/4/2023 10:44:33                      | <b>IRM Calibration Status</b> | Success                     |
| <b>DA Method</b>       | small molecular data analysis method.m | <b>Comment</b>                | ESIH by fangsu              |

### User Spectra

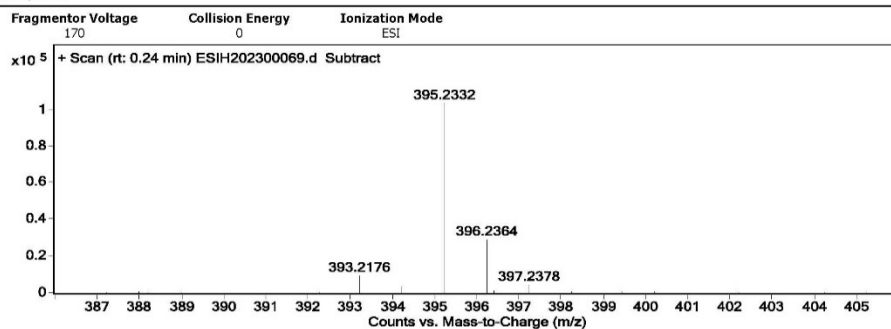

### Formula Calculator Results

| m/z      | Calc m/z | Diff (mDa) | Diff (ppm) | Ion Formula   | Ion    |
|----------|----------|------------|------------|---------------|--------|
| 395.2332 | 395.2329 | -0.26      | -0.66      | C24 H31 N2 O3 | (M+H)+ |

--- End Of Report ---

8f

S76



## Qualitative Analysis Report

Data Filename: ESIH202205831.d  
Sample ID:  
Instrument Name: Agilent G6520 Q-TOF  
Acquired Time: 12/21/2022 17:01:51  
DA Method: small molecular data analysis method.m

Sample Name: D8-CD140  
Position: P1-D8  
Acq Method: 20160322\_MS\_ESIH\_POS\_1min.m  
IRM Calibration Status: Success  
Comment: ESIH by zhuzhenyun

### User Spectra

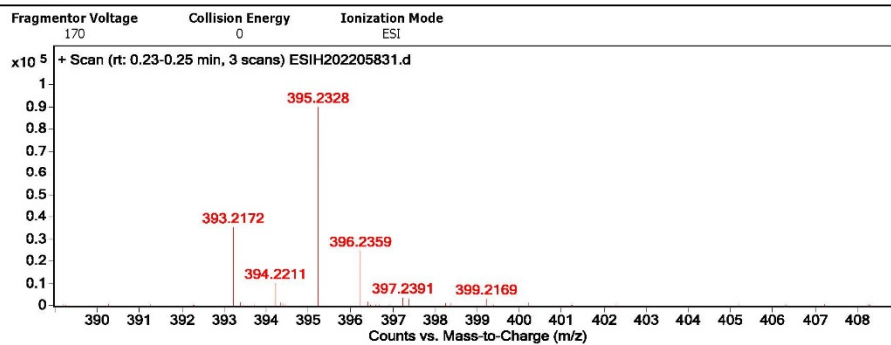

### Formula Calculator Results

| m/z      | Calc m/z | Diff (mDa) | Diff (ppm) | Ion Formula   | Ion    |
|----------|----------|------------|------------|---------------|--------|
| 395.2328 | 395.2329 | 0.12       | 0.31       | C24 H31 N2 O3 | (M+H)+ |

--- End Of Report ---

8g

## Qualitative Analysis Report

Data Filename: ESIH202300003.d  
Sample ID:  
Instrument Name: Agilent G6520 Q-TOF  
Acquired Time: 1/3/2023 13:20:00  
DA Method: small molecular data analysis method.m

Sample Name: D8-CD107  
Position: P1-A3  
Acq Method: 20160322\_MS\_ESIH\_POS\_1min.m  
IRM Calibration Status: Success  
Comment: ESIH by fangsuo

### User Spectra

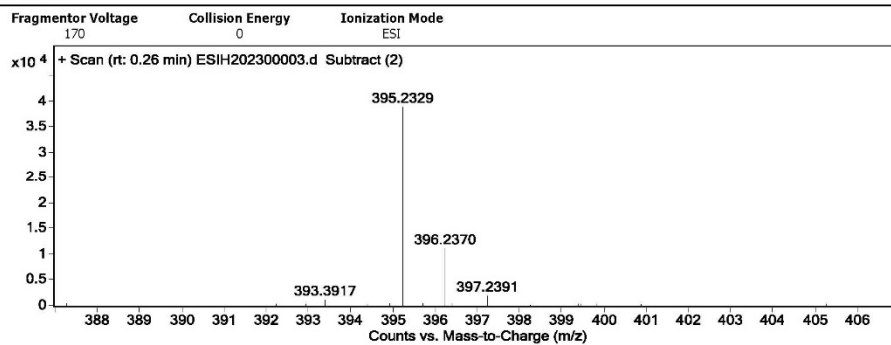

### Formula Calculator Results

| m/z      | Calc m/z | Diff (mDa) | Diff (ppm) | Ion Formula   | Ion    |
|----------|----------|------------|------------|---------------|--------|
| 395.2329 | 395.2329 | 0.06       | 0.15       | C24 H31 N2 O3 | (M+H)+ |

--- End Of Report ---

8h

S77

## Qualitative Analysis Report

Data Filename ESIH202300070.d  
Sample ID  
Instrument Name Agilent G6520 Q-TOF  
Acquired Time 1/4/2023 10:45:51  
DA Method small molecular data analysis method.m

Sample Name D8-CD151  
Position P1-A8  
Acq Method 20160322\_MS\_ESIH\_POS\_1min.m  
IRM Calibration Status Success  
Comment ESIH by fangsu

### User Spectra

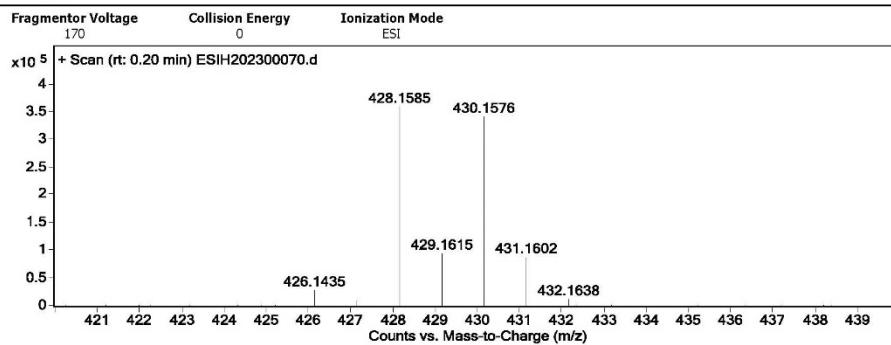

### Formula Calculator Results

| m/z      | Calc m/z | Diff (mDa) | Diff (ppm) | Ion Formula    | Ion    |
|----------|----------|------------|------------|----------------|--------|
| 428.1585 | 428.1584 | -0.14      | -0.32      | C24 H31 Br N O | (M+H)+ |

--- End Of Report ---

8i

## Qualitative Analysis Report

Data Filename ESIH202300065.d  
Sample ID  
Instrument Name Agilent G6520 Q-TOF  
Acquired Time 1/4/2023 10:39:26  
DA Method small molecular data analysis method.m

Sample Name D8-CD115  
Position P1-A3  
Acq Method 20160322\_MS\_ESIH\_POS\_1min.m  
IRM Calibration Status Success  
Comment ESIH by fangsu

### User Spectra

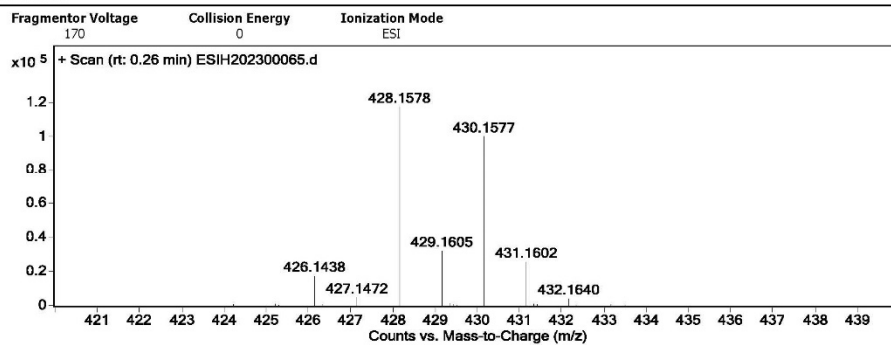

### Formula Calculator Results

| m/z      | Calc m/z | Diff (mDa) | Diff (ppm) | Ion Formula    | Ion    |
|----------|----------|------------|------------|----------------|--------|
| 428.1578 | 428.1584 | 0.51       | 1.19       | C24 H31 Br N O | (M+H)+ |

--- End Of Report ---

8j

S78

## Qualitative Analysis Report

Data Filename: ESIH202300002.d  
Sample ID:  
Instrument Name: Agilent G6520 Q-TOF  
Acquired Time: 1/3/2023 13:18:44  
DA Method: small molecular data analysis method.m

Sample Name: D8-CD105  
Position: P1-A2  
Acq Method: 20160322\_MS\_ESIH\_POS\_1min.m  
IRM Calibration Status: Success  
Comment: ESIH by fangsuo

### User Spectra

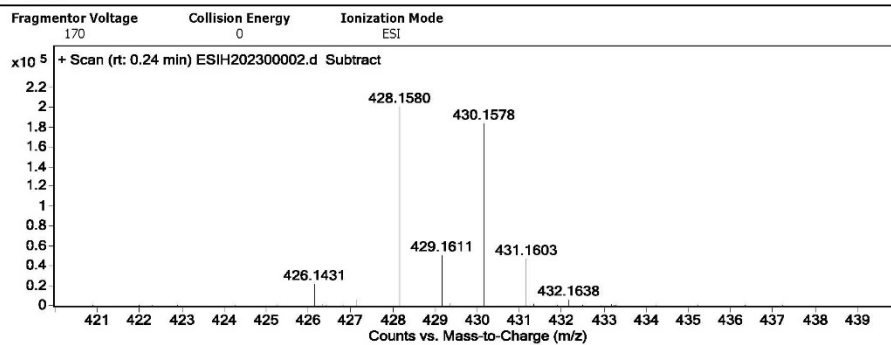

### Formula Calculator Results

| m/z     | Calc m/z | Diff (mDa) | Diff (ppm) | Ion Formula    | Ion    |
|---------|----------|------------|------------|----------------|--------|
| 428.158 | 428.1584 | 0.36       | 0.85       | C24 H31 Br N O | (M+H)+ |

--- End Of Report ---

8k

## Qualitative Analysis Report

Data Filename: ESIH202206031.d  
Sample ID:  
Instrument Name: Agilent G6520 Q-TOF  
Acquired Time: 12/29/2022 16:28:55  
DA Method: small molecular data analysis method.m

Sample Name: D8-CD114  
Position: P1-A9  
Acq Method: 20160322\_MS\_ESIH\_POS\_1min.m  
IRM Calibration Status: Success  
Comment: ESIH by fangsuo

### User Spectra

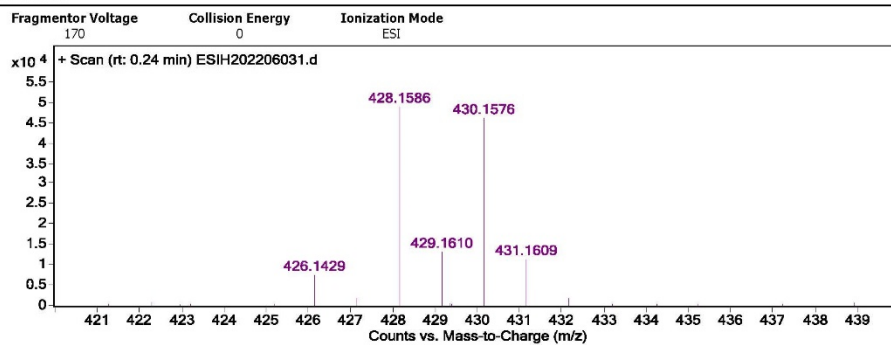

### Formula Calculator Results

| m/z      | Calc m/z | Diff (mDa) | Diff (ppm) | Ion Formula    | Ion    |
|----------|----------|------------|------------|----------------|--------|
| 428.1586 | 428.1584 | -0.25      | -0.58      | C24 H31 Br N O | (M+H)+ |

--- End Of Report ---

8l

S79

## Qualitative Analysis Report

Data Filename ESIH202300001.d  
Sample ID  
Instrument Name Agilent G6520 Q-TOF  
Acquired Time 1/3/2023 13:17:23  
DA Method small molecular data analysis method.m

Sample Name D8-CD103  
Position P1-A1  
Acq Method 20160322\_MS\_ESIH\_POS\_1min.m  
IRM Calibration Status Success  
Comment ESIH by fangsu

### User Spectra

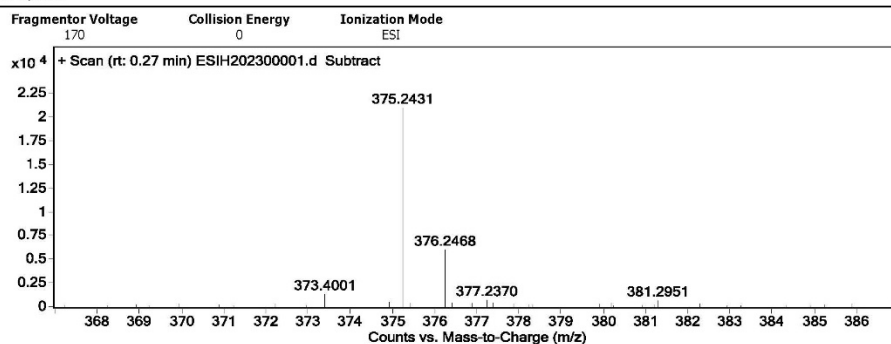

### Formula Calculator Results

| m/z      | Calc m/z | Diff (mDa) | Diff (ppm) | Ion Formula  | Ion    |
|----------|----------|------------|------------|--------------|--------|
| 375.2431 | 375.2431 | 0          | 0          | C25 H31 N2 O | (M+H)+ |

--- End Of Report ---

8m

## Qualitative Analysis Report

Data Filename ESIH202300005.d  
Sample ID  
Instrument Name Agilent G6520 Q-TOF  
Acquired Time 1/3/2023 13:22:32  
DA Method small molecular data analysis method.m

Sample Name D8-CD112  
Position P1-A5  
Acq Method 20160322\_MS\_ESIH\_POS\_1min.m  
IRM Calibration Status Success  
Comment ESIH by fangsu

### User Spectra

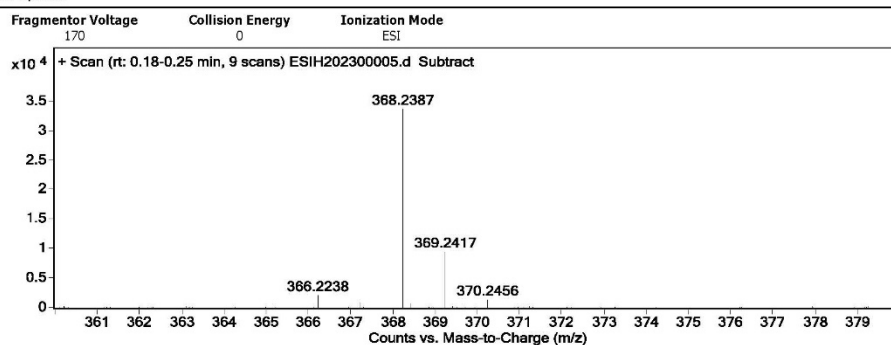

### Formula Calculator Results

| m/z      | Calc m/z | Diff (mDa) | Diff (ppm) | Ion Formula   | Ion    |
|----------|----------|------------|------------|---------------|--------|
| 368.2387 | 368.2384 | -0.3       | -0.82      | C24 H31 F N O | (M+H)+ |

--- End Of Report ---

8n

S80

## Qualitative Analysis Report

Data Filename ESIH202300004.d  
Sample ID  
Instrument Name Agilent G6520 Q-TOF  
Acquired Time 1/3/2023 13:21:15  
DA Method small molecular data analysis method.m

Sample Name D8-CD111  
Position P1-A4  
Acq Method 20160322\_MS\_ESIH\_POS\_1min.m  
IRM Calibration Status Success  
Comment ESIH by fangsuo

### User Spectra

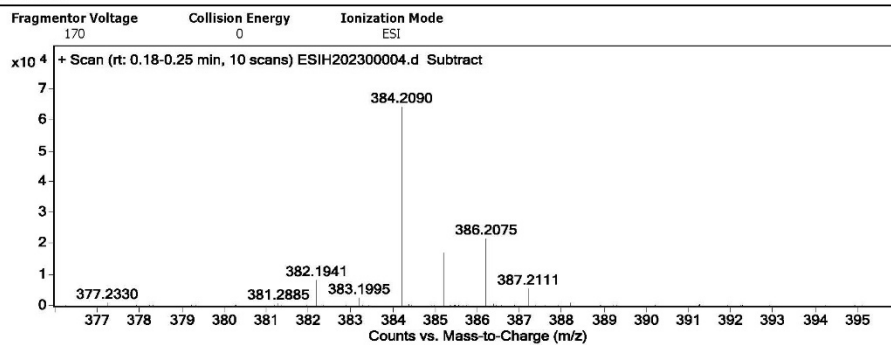

### Formula Calculator Results

| m/z     | Calc m/z | Diff (mDa) | Diff (ppm) | Ion Formula    | Ion    |
|---------|----------|------------|------------|----------------|--------|
| 384.209 | 384.2089 | -0.14      | -0.35      | C24 H31 Cl N O | (M+H)+ |

--- End Of Report ---

8p

## Qualitative Analysis Report

Data Filename ESIH202300007.d  
Sample ID  
Instrument Name Agilent G6520 Q-TOF  
Acquired Time 1/3/2023 13:25:07  
DA Method small molecular data analysis method.m

Sample Name D8-CD137  
Position P1-A7  
Acq Method 20160322\_MS\_ESIH\_POS\_1min.m  
IRM Calibration Status Success  
Comment ESIH by fangsuo

### User Spectra

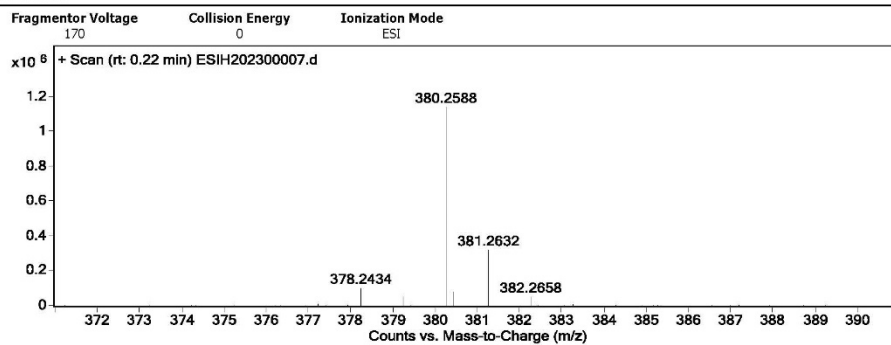

### Formula Calculator Results

| m/z      | Calc m/z | Diff (mDa) | Diff (ppm) | Ion Formula  | Ion    |
|----------|----------|------------|------------|--------------|--------|
| 380.2588 | 380.2584 | -0.42      | -1.11      | C25 H34 N O2 | (M+H)+ |

--- End Of Report ---

8q

S81

## Qualitative Analysis Report

Data Filename ESIH202300011.d  
Sample ID  
Instrument Name Agilent G6520 Q-TOF  
Acquired Time 1/3/2023 13:30:14  
DA Method small molecular data analysis method.m

Sample Name D8-CD154  
Position P1-B2  
Acq Method 20160322\_MS\_ESIH\_POS\_1min.m  
IRM Calibration Status Success  
Comment ESIH by fangsu

### User Spectra

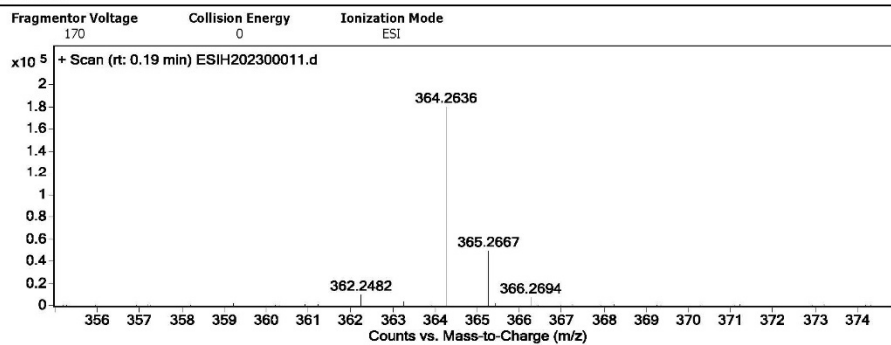

### Formula Calculator Results

| m/z      | Calc m/z | Diff (mDa) | Diff (ppm) | Ion Formula | Ion    |
|----------|----------|------------|------------|-------------|--------|
| 364.2636 | 364.2635 | -0.12      | -0.33      | C25 H34 N O | (M+H)+ |

--- End Of Report ---

8r

## Qualitative Analysis Report

Data Filename N\_ESIH202300010.d  
Sample ID  
Instrument Name Agilent G6520 Q-TOF  
Acquired Time 1/3/2023 14:01:06  
DA Method small molecular data analysis method.m

Sample Name D8-CD147  
Position P1-B1  
Acq Method 20160324\_MS\_ESIH\_NEG\_1min.m  
IRM Calibration Status Success  
Comment ESIH by fangsu

### User Spectra

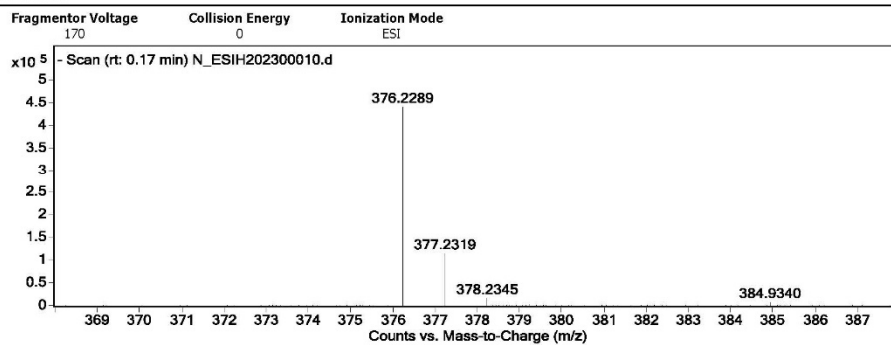

### Formula Calculator Results

| m/z      | Calc m/z | Diff (mDa) | Diff (ppm) | Ion Formula  | Ion    |
|----------|----------|------------|------------|--------------|--------|
| 376.2289 | 376.2282 | -0.67      | -1.77      | C25 H30 N O2 | (M-H)- |

--- End Of Report ---

8s

S82

## Qualitative Analysis Report

Data Filename ESIH202300014.d  
Sample ID  
Instrument Name Agilent G6520 Q-TOF  
Acquired Time 1/3/2023 13:34:05  
DA Method small molecular data analysis method.m

Sample Name D8-CE030  
Position P1-B5  
Acq Method 20160322\_MS\_ESIH\_POS\_1min.m  
IRM Calibration Status Success  
Comment ESIH by fangsuo

### User Spectra

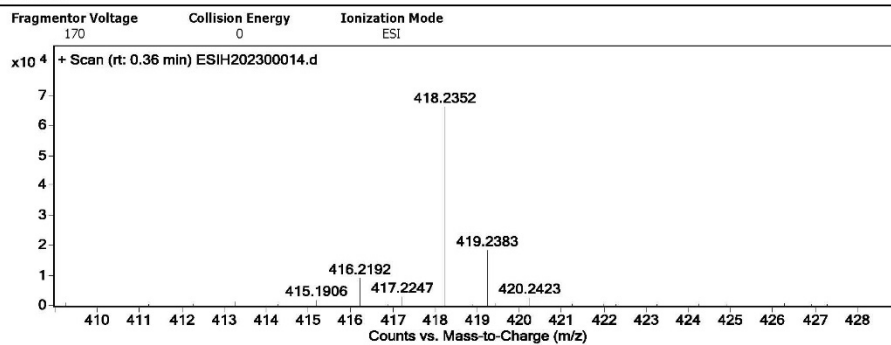

### Formula Calculator Results

| m/z      | Calc m/z | Diff (mDa) | Diff (ppm) | Ion Formula    | Ion    |
|----------|----------|------------|------------|----------------|--------|
| 418.2352 | 418.2352 | 0.05       | 0.11       | C25 H31 F3 N O | (M+H)+ |

--- End Of Report ---

8t

## Qualitative Analysis Report

Data Filename ESIH202300012.d  
Sample ID  
Instrument Name Agilent G6520 Q-TOF  
Acquired Time 1/3/2023 13:31:31  
DA Method small molecular data analysis method.m

Sample Name D8-CE016  
Position P1-B3  
Acq Method 20160322\_MS\_ESIH\_POS\_1min.m  
IRM Calibration Status Success  
Comment ESIH by fangsuo

### User Spectra

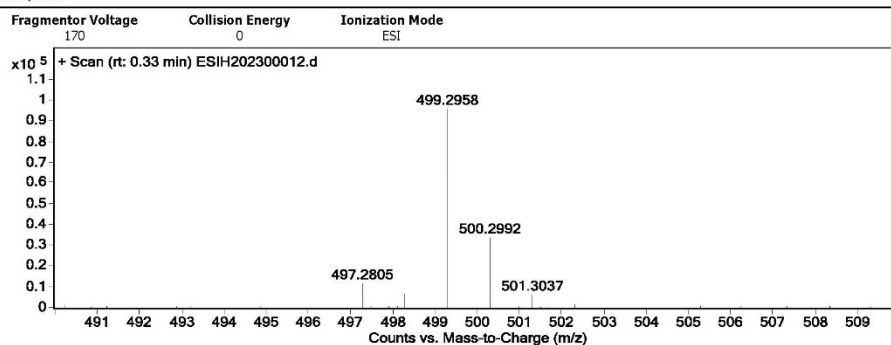

### Formula Calculator Results

| m/z      | Calc m/z | Diff (mDa) | Diff (ppm) | Ion Formula   | Ion    |
|----------|----------|------------|------------|---------------|--------|
| 499.2958 | 499.2955 | -0.29      | -0.57      | C32 H39 N2 O3 | (M+H)+ |

--- End Of Report ---

8u

S83

## Qualitative Analysis Report

Data Filename ESIH202300013.d  
Sample ID  
Instrument Name Agilent G6520 Q-TOF  
Acquired Time 1/3/2023 13:32:48  
DA Method small molecular data analysis method.m

Sample Name D8-CE028  
Position P1-B4  
Acq Method 20160322\_MS\_ESIH\_POS\_1min.m  
IRM Calibration Status Success  
Comment ESIH by fangsu

### User Spectra

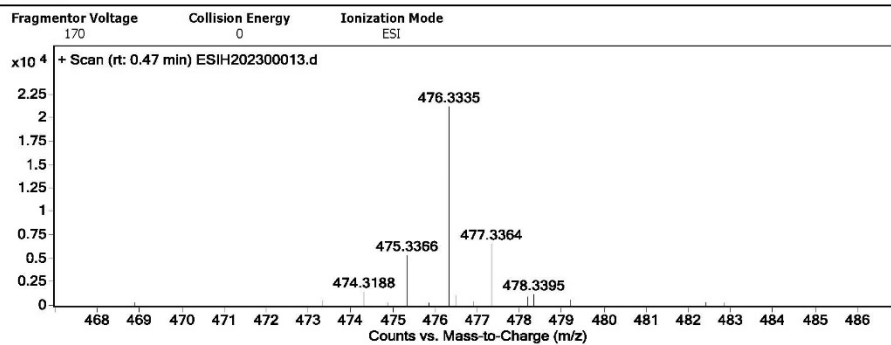

### Formula Calculator Results

| m/z      | Calc m/z | Diff (mDa) | Diff (ppm) | Ion Formula        | Ion    |
|----------|----------|------------|------------|--------------------|--------|
| 476.3335 | 476.3331 | -0.47      | -0.99      | C30 H43 [11B] N O3 | (M+H)+ |

--- End Of Report ---

8v

## Qualitative Analysis Report

Data Filename ESIH202300015.d  
Sample ID  
Instrument Name Agilent G6520 Q-TOF  
Acquired Time 1/3/2023 13:35:22  
DA Method small molecular data analysis method.m

Sample Name D8-CE036  
Position P1-B6  
Acq Method 20160322\_MS\_ESIH\_POS\_1min.m  
IRM Calibration Status Success  
Comment ESIH by fangsu

### User Spectra

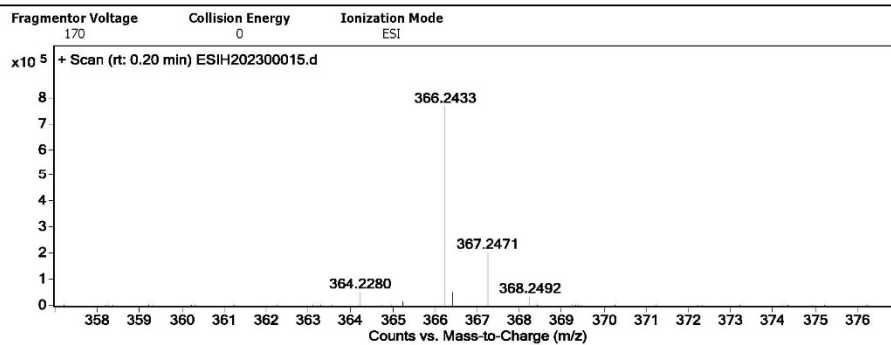

### Formula Calculator Results

| m/z      | Calc m/z | Diff (mDa) | Diff (ppm) | Ion Formula  | Ion    |
|----------|----------|------------|------------|--------------|--------|
| 366.2433 | 366.2428 | -0.51      | -1.4       | C24 H32 N O2 | (M+H)+ |

--- End Of Report ---

8w

S84



## Qualitative Analysis Report

Data Filename: ESIH202206033.d  
Sample ID:   
Instrument Name: Agilent G6520 Q-TOF  
Acquired Time: 12/29/2022 16:31:30  
DA Method: small molecular data analysis method.m

Sample Name: D8-CD117  
Position: P1-B2  
Acq Method: 20160322\_MS\_ESIH\_POS\_1min.m  
IRM Calibration Status: Success  
Comment: ESIH by fangsuo

### User Spectra

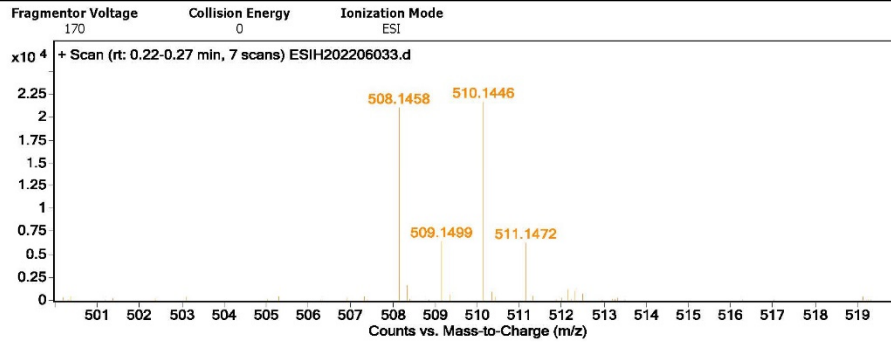

### Formula Calculator Results

| m/z      | Calc m/z | Diff (mDa) | Diff (ppm) | Ion Formula        | Ion     |
|----------|----------|------------|------------|--------------------|---------|
| 508.1458 | 508.1458 | -0.07      | -0.13      | C26 H32 Br N Na O3 | (M+Na)+ |

--- End Of Report ---

8x

## Qualitative Analysis Report

Data Filename: ESIH202300078.d  
Sample ID:   
Instrument Name: Agilent G6520 Q-TOF  
Acquired Time: 1/4/2023 10:56:07  
DA Method: small molecular data analysis method.m

Sample Name: D8-CD117-B  
Position: P1-B7  
Acq Method: 20160322\_MS\_ESIH\_POS\_1min.m  
IRM Calibration Status: Success  
Comment: ESIH by fangsuo

### User Spectra

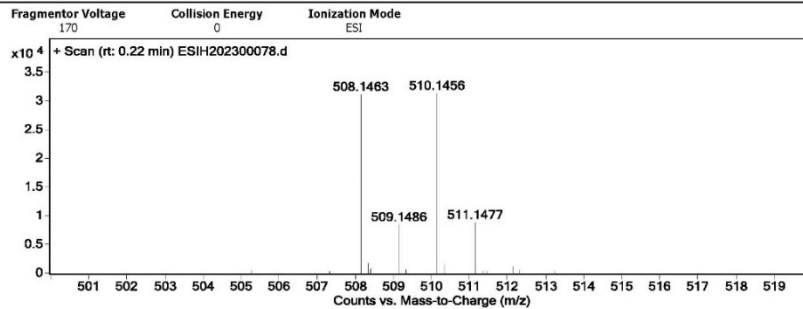

### Formula Calculator Results

| m/z      | Calc m/z | Diff (mDa) | Diff (ppm) | Ion Formula        | Ion     |
|----------|----------|------------|------------|--------------------|---------|
| 508.1463 | 508.1458 | -0.54      | -1.06      | C26 H32 Br N Na O3 | (M+Na)+ |

--- End Of Report ---

8x'

S85

## Qualitative Analysis Report

Data Filename: ESIH202300066.d  
Sample ID:   
Instrument Name: Agilent G6520 Q-TOF  
Acquired Time: 1/4/2023 10:40:42  
DA Method: small molecular data analysis method.m  
Sample Name: D8-CD124  
Position: P1-A4  
Acq Method: 20160322\_MS\_ESIH\_POS\_1min.m  
IRM Calibration Status: Success  
Comment: ESIH by fangsu

### User Spectra

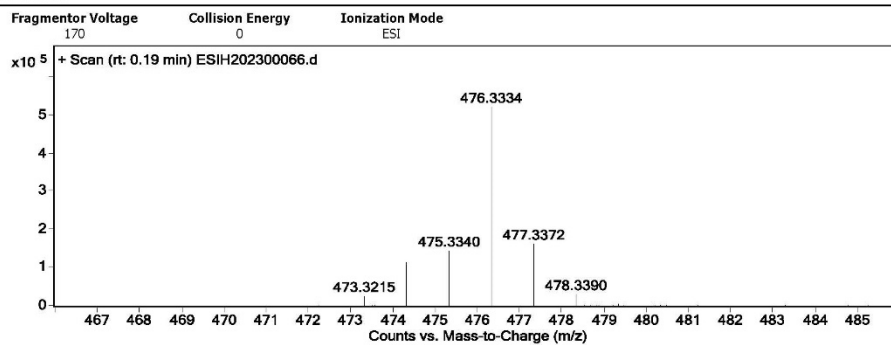

### Formula Calculator Results

| m/z      | Calc m/z | Diff (mDa) | Diff (ppm) | Ion Formula        | Ion    |
|----------|----------|------------|------------|--------------------|--------|
| 476.3334 | 476.3331 | -0.38      | -0.8       | C30 H43 [11B] N O3 | (M+H)+ |

--- End Of Report ---

8y

## Qualitative Analysis Report

Data Filename: ESIH202205830.d  
Sample ID:   
Instrument Name: Agilent G6520 Q-TOF  
Acquired Time: 12/21/2022 17:00:34  
DA Method: small molecular data analysis method.m  
Sample Name: D8-CD109  
Position: P1-D7  
Acq Method: 20160322\_MS\_ESIH\_POS\_1min.m  
IRM Calibration Status: Success  
Comment: ESIH by zhuzhenyun

### User Spectra

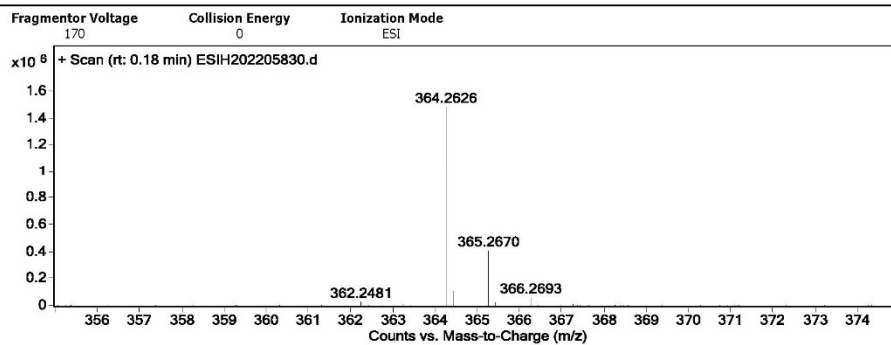

### Formula Calculator Results

| m/z      | Calc m/z | Diff (mDa) | Diff (ppm) | Ion Formula | Ion    |
|----------|----------|------------|------------|-------------|--------|
| 364.2626 | 364.2635 | 0.87       | 2.4        | C25 H34 N O | (M+H)+ |

--- End Of Report ---

8ab

S86

## Qualitative Analysis Report

Data Filename ESIH202300008.d  
Sample ID  
Instrument Name Agilent G6520 Q-TOF  
Acquired Time 1/3/2023 13:26:24  
DA Method small molecular data analysis method.m

Sample Name D8-CD138  
Position P1-A8  
Acq Method 20160322\_MS\_ESIH\_POS\_1min.m  
IRM Calibration Status Success  
Comment ESIH by fangsu

### User Spectra

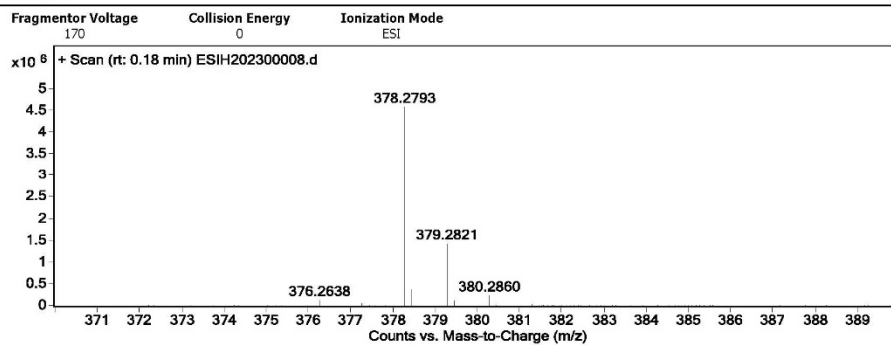

### Formula Calculator Results

| m/z      | Calc m/z | Diff (mDa) | Diff (ppm) | Ion Formula                         | Ion                |
|----------|----------|------------|------------|-------------------------------------|--------------------|
| 378.2793 | 378.2791 | -0.13      | -0.35      | C <sub>26</sub> H <sub>36</sub> N O | (M+H) <sup>+</sup> |

--- End Of Report ---

8ac

## Qualitative Analysis Report

Data Filename ESIH202300009.d  
Sample ID  
Instrument Name Agilent G6520 Q-TOF  
Acquired Time 1/3/2023 13:27:39  
DA Method small molecular data analysis method.m

Sample Name D8-CD144  
Position P1-A9  
Acq Method 20160322\_MS\_ESIH\_POS\_1min.m  
IRM Calibration Status Success  
Comment ESIH by fangsu

### User Spectra

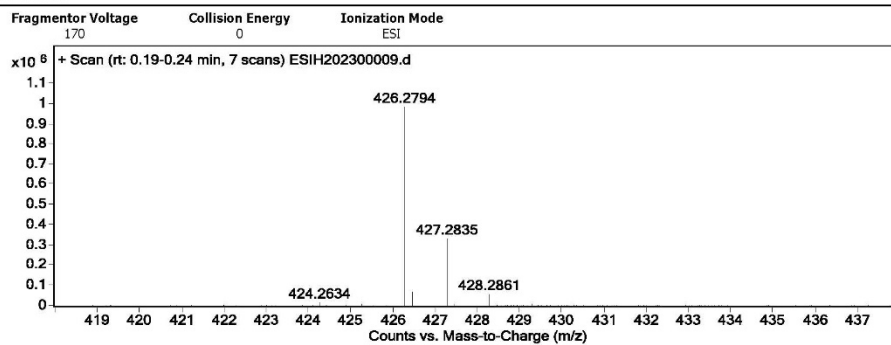

### Formula Calculator Results

| m/z      | Calc m/z | Diff (mDa) | Diff (ppm) | Ion Formula                         | Ion                |
|----------|----------|------------|------------|-------------------------------------|--------------------|
| 426.2794 | 426.2791 | -0.31      | -0.72      | C <sub>30</sub> H <sub>36</sub> N O | (M+H) <sup>+</sup> |

--- End Of Report ---

8ad

S87

## Qualitative Analysis Report

Data Filename: ESIH202300064.d  
Sample ID:  
Instrument Name: Agilent G6520 Q-TOF  
Acquired Time: 1/4/2023 10:38:09  
DA Method: small molecular data analysis method.m

Sample Name: D8-CD143  
Position: P1-A2  
Acq Method: 20160322\_MS\_ESIH\_POS\_1min.m  
IRM Calibration Status: Success  
Comment: ESIH by fangsü

### User Spectra

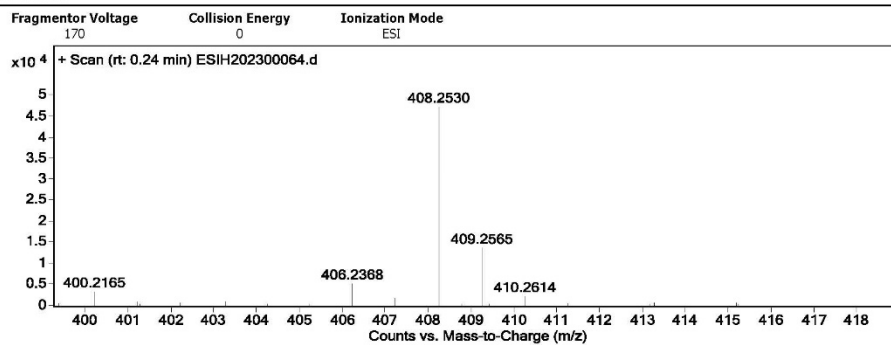

### Formula Calculator Results

| m/z     | Calc m/z | Diff (mDa) | Diff (ppm) | Ion Formula                                      | Ion                |
|---------|----------|------------|------------|--------------------------------------------------|--------------------|
| 408.253 | 408.2533 | 0.34       | 0.83       | C <sub>26</sub> H <sub>34</sub> N O <sub>3</sub> | (M+H) <sup>+</sup> |

--- End Of Report ---

8ae

## Qualitative Analysis Report

Data Filename: ESIH202300077.d  
Sample ID:  
Instrument Name: Agilent G6520 Q-TOF  
Acquired Time: 1/4/2023 10:54:51  
DA Method: small molecular data analysis method.m

Sample Name: D8-CD156  
Position: P1-B6  
Acq Method: 20160322\_MS\_ESIH\_POS\_1min.m  
IRM Calibration Status: Success  
Comment: ESIH by fangsü

### User Spectra

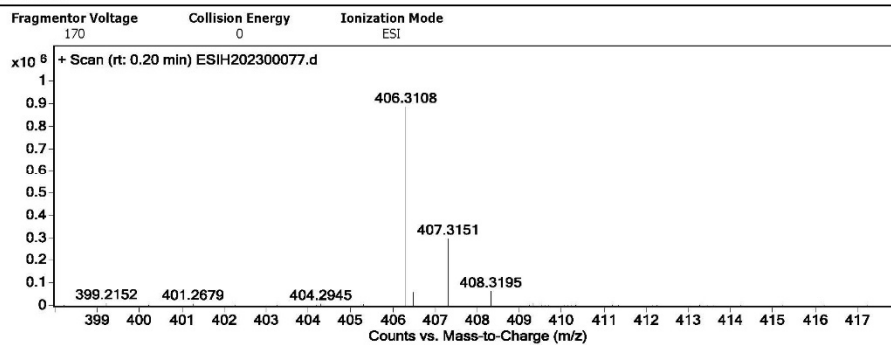

### Formula Calculator Results

| m/z      | Calc m/z | Diff (mDa) | Diff (ppm) | Ion Formula                         | Ion                |
|----------|----------|------------|------------|-------------------------------------|--------------------|
| 406.3108 | 406.3104 | -0.35      | -0.86      | C <sub>28</sub> H <sub>40</sub> N O | (M+H) <sup>+</sup> |

--- End Of Report ---

8af

S88

## Qualitative Analysis Report

|                        |                                        |                               |                             |
|------------------------|----------------------------------------|-------------------------------|-----------------------------|
| <b>Data Filename</b>   | ESI202300072.d                         | <b>Sample Name</b>            | D8-CE032                    |
| <b>Sample ID</b>       |                                        | <b>Position</b>               | P1-B1                       |
| <b>Instrument Name</b> | Agilent G6520 Q-TOF                    | <b>Acq Method</b>             | 20160322_MS_ESIH_POS_1min.m |
| <b>Acquired Time</b>   | 1/4/2023 10:48:22                      | <b>IRM Calibration Status</b> | Success                     |
| <b>DA Method</b>       | small molecular data analysis method.m | <b>Comment</b>                | ESIH by fangsuo             |

### User Spectra

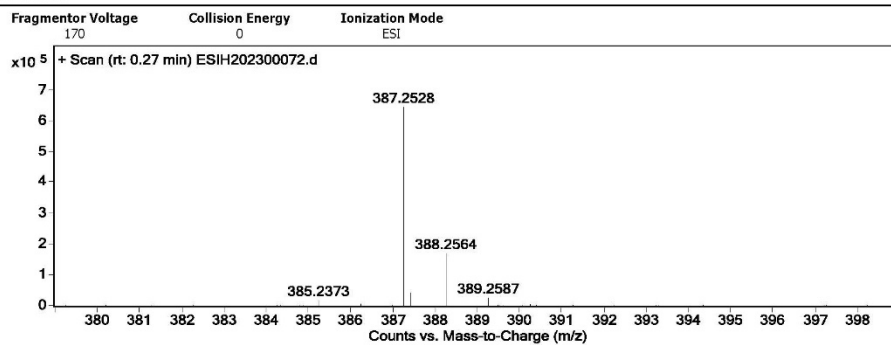

### Formula Calculator Results

| m/z      | Calc m/z | Diff (mDa) | Diff (ppm) | Ion Formula | Ion    |
|----------|----------|------------|------------|-------------|--------|
| 387.2528 | 387.253  | 0.16       | 0.41       | C24 H35 O4  | (M+H)+ |

--- End Of Report ---

9

## Qualitative Analysis Report

|                        |                                        |                               |                             |
|------------------------|----------------------------------------|-------------------------------|-----------------------------|
| <b>Data Filename</b>   | ESI202300073.d                         | <b>Sample Name</b>            | D8-CE045                    |
| <b>Sample ID</b>       |                                        | <b>Position</b>               | P1-B2                       |
| <b>Instrument Name</b> | Agilent G6520 Q-TOF                    | <b>Acq Method</b>             | 20160322_MS_ESIH_POS_1min.m |
| <b>Acquired Time</b>   | 1/4/2023 10:49:45                      | <b>IRM Calibration Status</b> | Success                     |
| <b>DA Method</b>       | small molecular data analysis method.m | <b>Comment</b>                | ESIH by fangsuo             |

### User Spectra

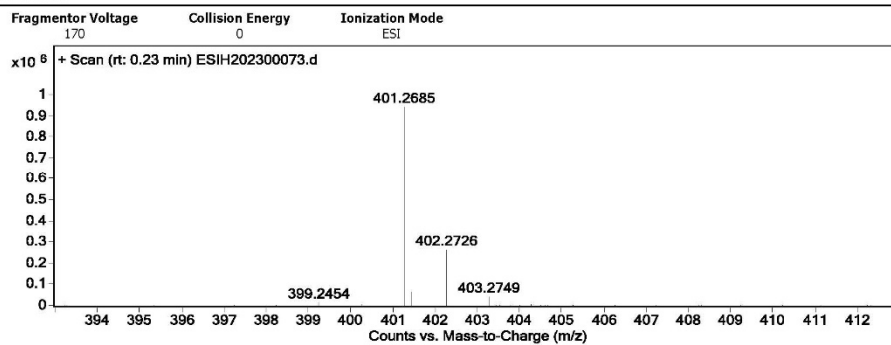

### Formula Calculator Results

| m/z      | Calc m/z | Diff (mDa) | Diff (ppm) | Ion Formula | Ion    |
|----------|----------|------------|------------|-------------|--------|
| 401.2685 | 401.2686 | 0.13       | 0.32       | C25 H37 O4  | (M+H)+ |

--- End Of Report ---

10

S89

## Qualitative Analysis Report

|                        |                                        |                               |                             |
|------------------------|----------------------------------------|-------------------------------|-----------------------------|
| <b>Data Filename</b>   | ESI202300076.d                         | <b>Sample Name</b>            | D8-CE069                    |
| <b>Sample ID</b>       |                                        | <b>Position</b>               | P1-B5                       |
| <b>Instrument Name</b> | Agilent G6520 Q-TOF                    | <b>Acq Method</b>             | 20160322_MS_ESIH_POS_1min.m |
| <b>Acquired Time</b>   | 1/4/2023 10:53:35                      | <b>IRM Calibration Status</b> | Success                     |
| <b>DA Method</b>       | small molecular data analysis method.m | <b>Comment</b>                | ESIH by fangsuo             |

### User Spectra

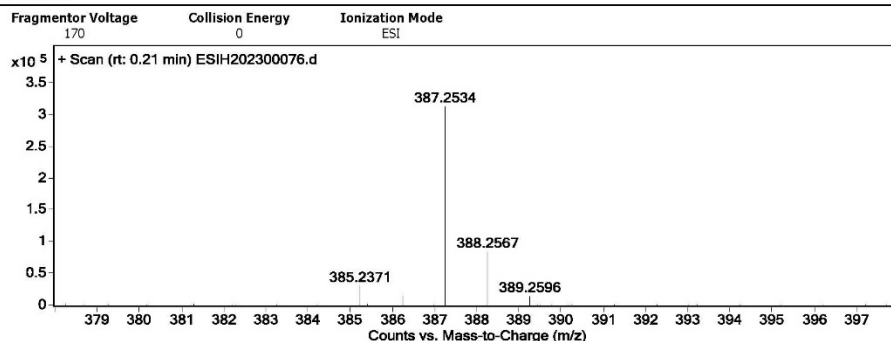

### Formula Calculator Results

| m/z      | Calc m/z | Diff (mDa) | Diff (ppm) | Ion Formula                                    | Ion                |
|----------|----------|------------|------------|------------------------------------------------|--------------------|
| 387.2534 | 387.253  | -0.42      | -1.08      | C <sub>24</sub> H <sub>35</sub> O <sub>4</sub> | (M+H) <sup>+</sup> |

--- End Of Report ---

11

## Qualitative Analysis Report

|                        |                                        |                               |                             |
|------------------------|----------------------------------------|-------------------------------|-----------------------------|
| <b>Data Filename</b>   | ESI202300075.d                         | <b>Sample Name</b>            | D8-CE068                    |
| <b>Sample ID</b>       |                                        | <b>Position</b>               | P1-B4                       |
| <b>Instrument Name</b> | Agilent G6520 Q-TOF                    | <b>Acq Method</b>             | 20160322_MS_ESIH_POS_1min.m |
| <b>Acquired Time</b>   | 1/4/2023 10:52:18                      | <b>IRM Calibration Status</b> | Success                     |
| <b>DA Method</b>       | small molecular data analysis method.m | <b>Comment</b>                | ESIH by fangsuo             |

### User Spectra

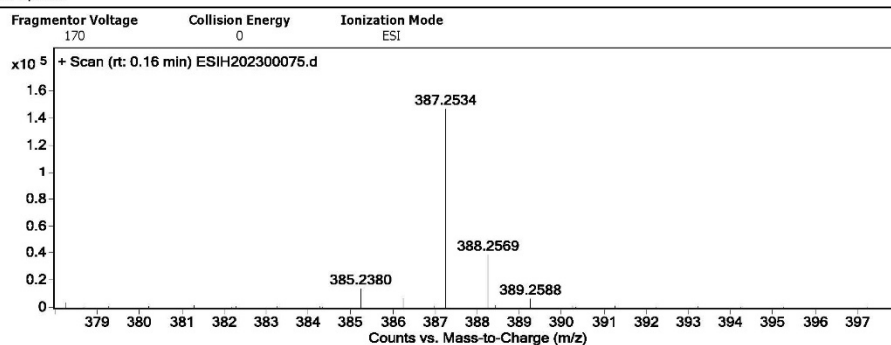

### Formula Calculator Results

| m/z      | Calc m/z | Diff (mDa) | Diff (ppm) | Ion Formula                                    | Ion                |
|----------|----------|------------|------------|------------------------------------------------|--------------------|
| 387.2534 | 387.253  | -0.44      | -1.14      | C <sub>24</sub> H <sub>35</sub> O <sub>4</sub> | (M+H) <sup>+</sup> |

--- End Of Report ---

12

## Qualitative Analysis Report

Data Filename: ESIH202300074.d  
Sample ID:  
Instrument Name: Agilent G6520 Q-TOF  
Acquired Time: 1/4/2023 10:51:01  
DA Method: small molecular data analysis method.m

Sample Name: D8-CE067  
Position: P1-B3  
Acq Method: 20160322\_MS\_ESIH\_POS\_1min.m  
IRM Calibration Status: Success  
Comment: ESIH by fangsuo

### User Spectra

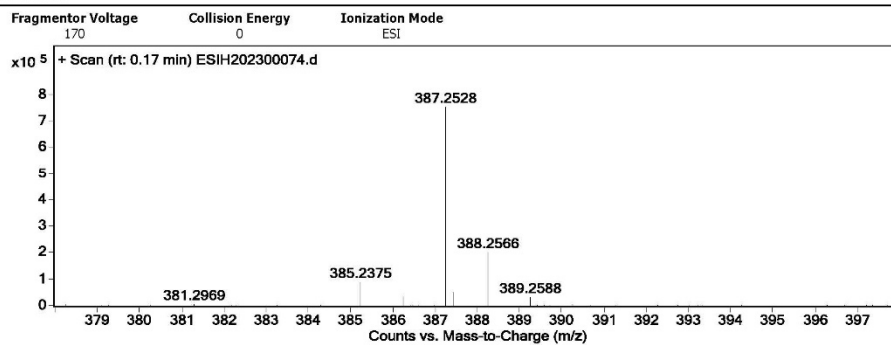

### Formula Calculator Results

| m/z      | Calc m/z | Diff (mDa) | Diff (ppm) | Ion Formula | Ion    |
|----------|----------|------------|------------|-------------|--------|
| 387.2528 | 387.253  | 0.17       | 0.44       | C24 H35 O4  | (M+H)+ |

--- End Of Report ---

13

## Qualitative Analysis Report

Data Filename: ESIH202206032.d  
Sample ID:  
Instrument Name: Agilent G6520 Q-TOF  
Acquired Time: 12/29/2022 16:30:13  
DA Method: small molecular data analysis method.m

Sample Name: D8-CE051  
Position: P1-B1  
Acq Method: 20160322\_MS\_ESIH\_POS\_1min.m  
IRM Calibration Status: Success  
Comment: ESIH by fangsuo

### User Spectra

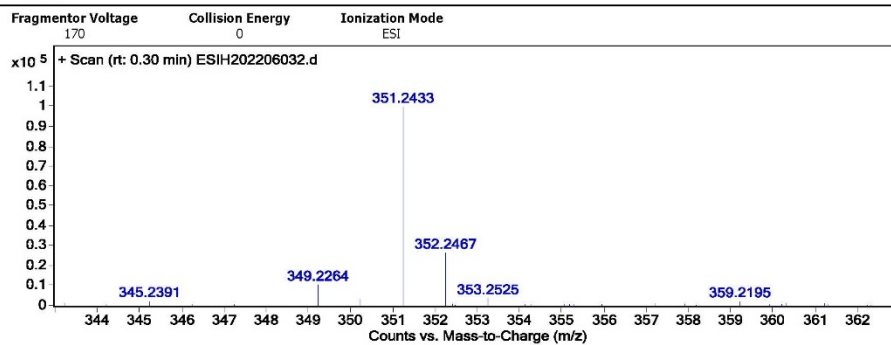

### Formula Calculator Results

| m/z      | Calc m/z | Diff (mDa) | Diff (ppm) | Ion Formula  | Ion    |
|----------|----------|------------|------------|--------------|--------|
| 351.2433 | 351.2431 | -0.24      | -0.68      | C23 H31 N2 O | (M+H)+ |

--- End Of Report ---

14

S91

## 5. UPLC purity reports of final compounds

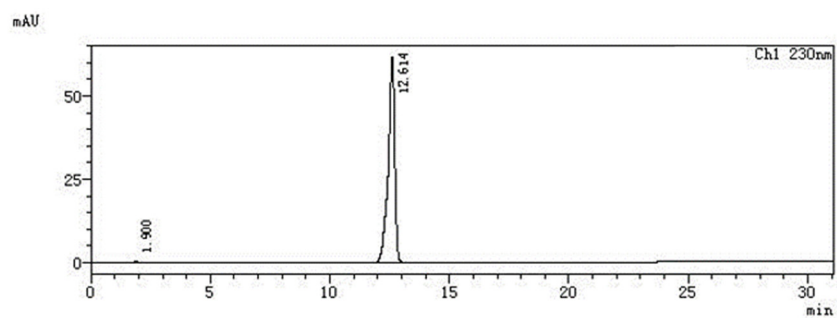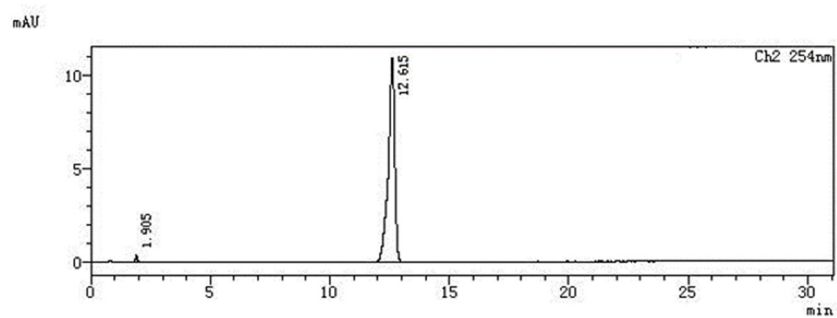

|     | Retention Time (Min) | Area    | Peak Height | %Area   |
|-----|----------------------|---------|-------------|---------|
| 1   | 1.900                | 3178    | 563         | 0.270   |
| 2   | 12.614               | 1175810 | 61603       | 99.730  |
| sum |                      | 1178989 | 62166       | 100.000 |

|     | Retention Time (Min) | Area   | Peak Height | %Area   |
|-----|----------------------|--------|-------------|---------|
| 1   | 1.905                | 2007   | 356         | 0.967   |
| 2   | 12.615               | 205609 | 10878       | 99.033  |
| sum |                      | 207616 | 11234       | 100.000 |

**6 @ 230 nm & 254 nm**



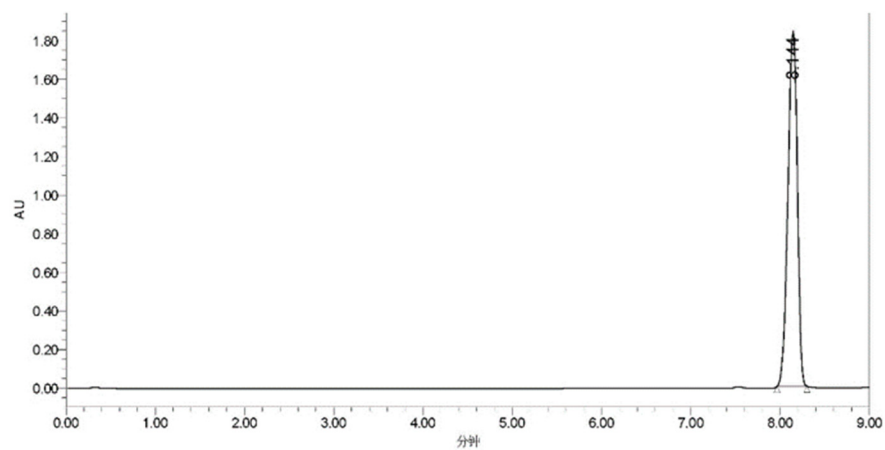

|     | Retention Time (Min) | Area     | Peak Height | %Area  |
|-----|----------------------|----------|-------------|--------|
| 1   | 8.144                | 13517588 | 1850156     | 100.00 |
| Sum |                      |          |             | 100.0  |

**8a @230 nm**

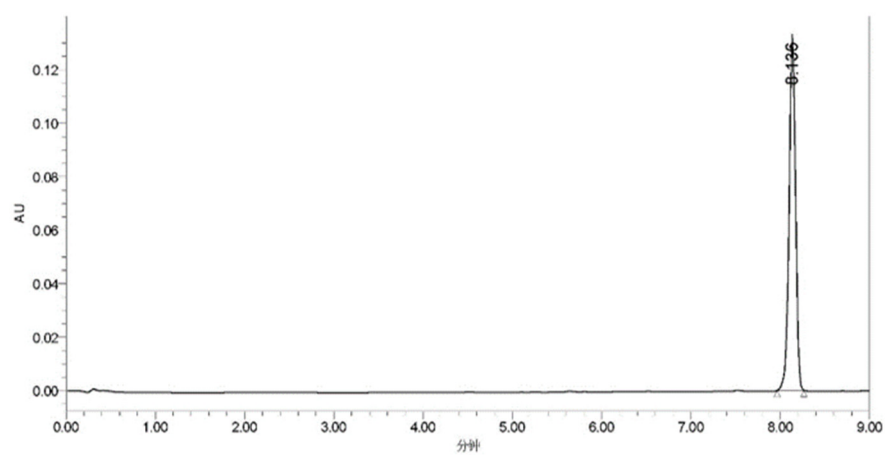

|     | Retention Time (Min) | Area   | Peak Height | %Area  |
|-----|----------------------|--------|-------------|--------|
| 1   | 8.136                | 670602 | 131595      | 100.00 |
| Sum |                      |        |             | 100.0  |

**8a @254 nm**

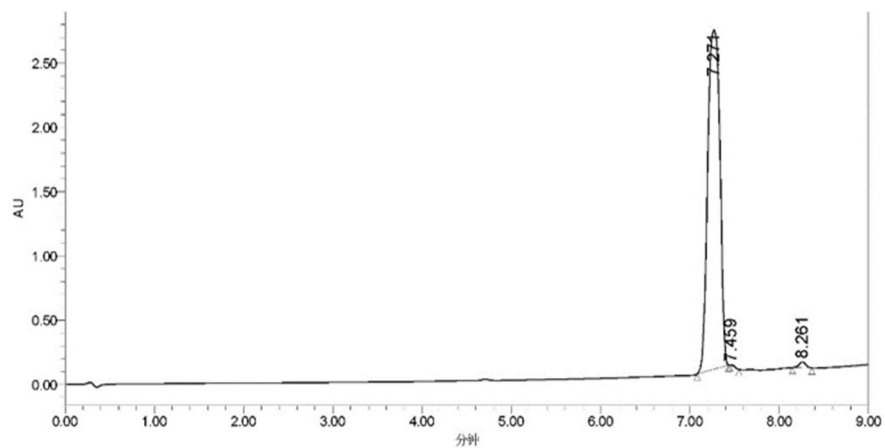

|     | Retention Time (Min) | Area     | Peak Height | %Area |
|-----|----------------------|----------|-------------|-------|
| 1   | 7.271                | 25133382 | 2647718     | 99.00 |
| 2   | 7.459                | 23308    | 4030        | 0.09  |
| 3   | 8.261                | 230978   | 45531       | 0.91  |
| Sum |                      |          |             | 100.0 |

**8b @230 nm**

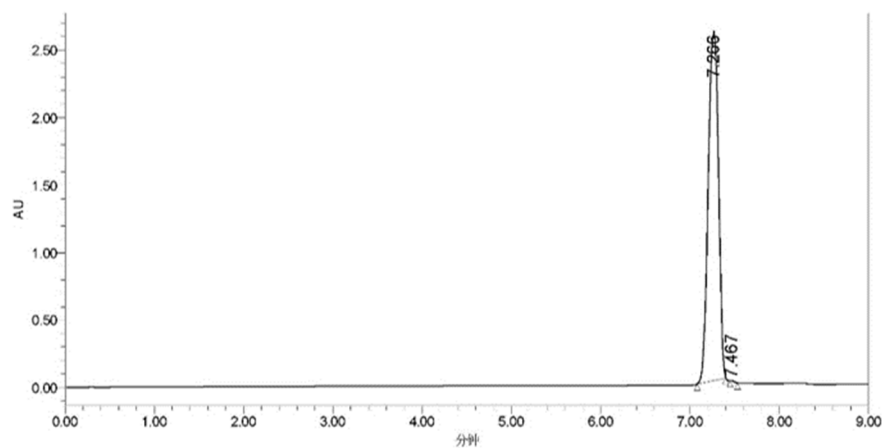

|     | Retention Time (Min) | Area     | Peak Height | %Area |
|-----|----------------------|----------|-------------|-------|
| 1   | 7.266                | 20728348 | 2594123     | 99.97 |
| 2   | 7.467                | 6210     | 2482        | 0.03  |
| Sum |                      |          |             | 100.0 |

**8b @254 nm**

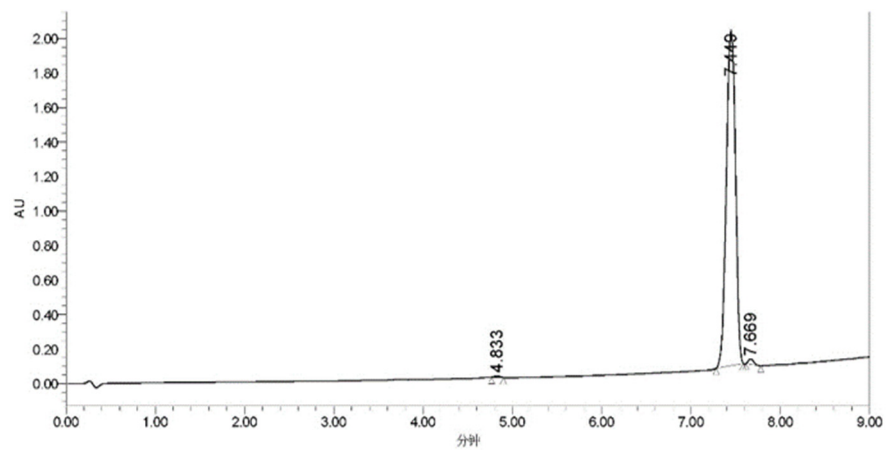

|     | Retention Time (Min) | Area     | Peak Height | %Area |
|-----|----------------------|----------|-------------|-------|
| 1   | 4.833                | 35322    | 8239        | 0.25  |
| 2   | 7.449                | 13885871 | 1950909     | 98.88 |
| 3   | 7.669                | 122129   | 29263       | 0.87  |
| Sum |                      |          |             | 100.0 |

**8c @230 nm**

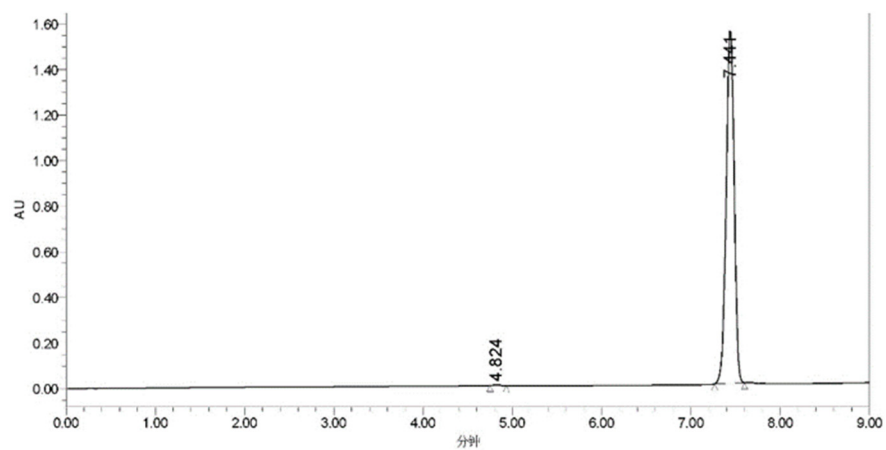

|     | Retention Time (Min) | Area    | Peak Height | %Area |
|-----|----------------------|---------|-------------|-------|
| 1   | 4.824                | 18329   | 3988        | 0.19  |
| 2   | 7.441                | 9692769 | 1556190     | 99.81 |
| Sum |                      |         |             | 100.0 |

**8c @254 nm**

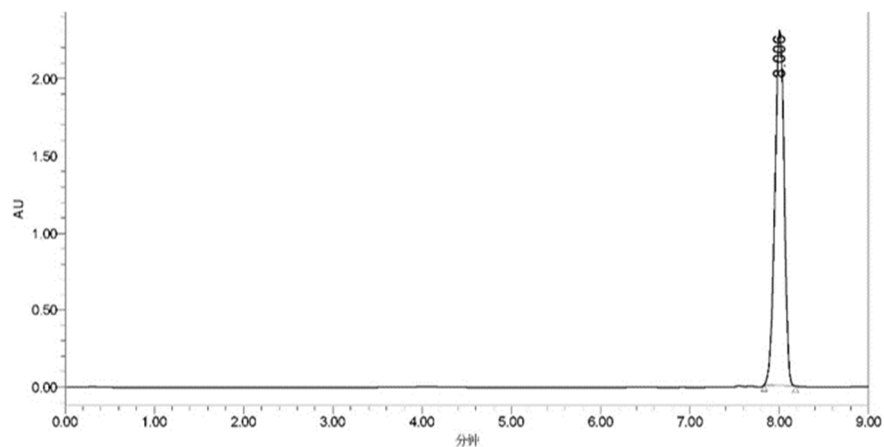

|     | Retention Time (Min) | Area     | Peak Height | %Area  |
|-----|----------------------|----------|-------------|--------|
| 1   | 8.006                | 16664123 | 2317255     | 100.00 |
| Sum |                      |          |             | 100.0  |

**8d @230 nm**

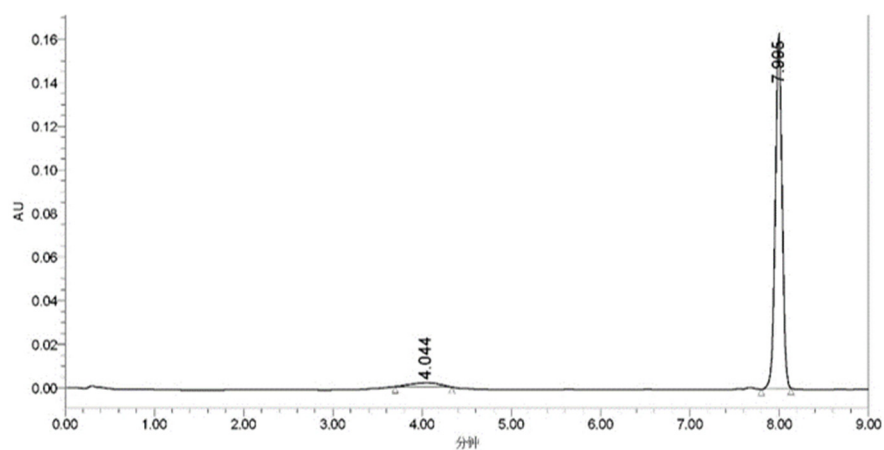

|     | Retention Time (Min) | Area   | Peak Height | %Area |
|-----|----------------------|--------|-------------|-------|
| 1   | 4.044                | 42009  | 1898        | 4.61  |
| 2   | 7.995                | 868508 | 162466      | 95.39 |
| Sum |                      |        |             | 100.0 |

**8d @254 nm**

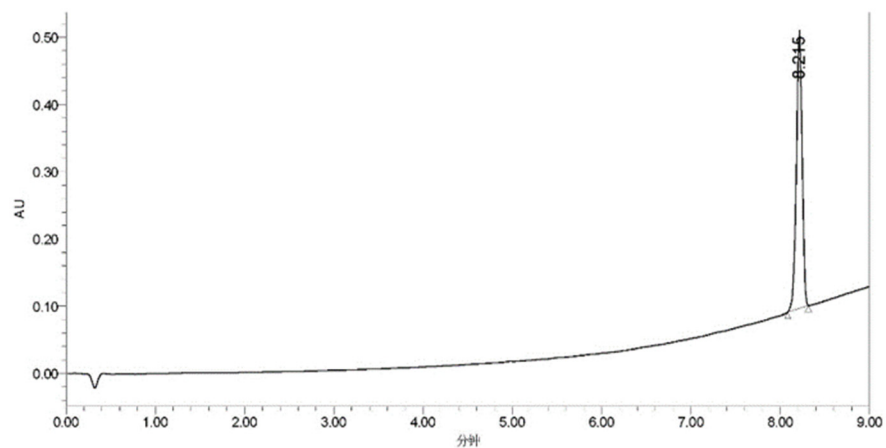

|     | Retention Time (Min) | Area    | Peak Height | %Area  |
|-----|----------------------|---------|-------------|--------|
| 1   | 8.215                | 1857093 | 406539      | 100.00 |
| Sum |                      |         |             | 100.0  |

**8e @230 nm**

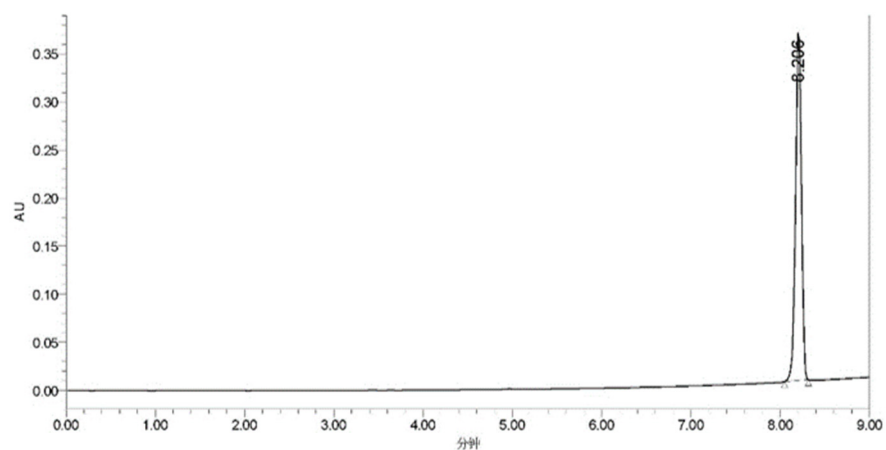

|     | Retention Time (Min) | Area    | Peak Height | %Area  |
|-----|----------------------|---------|-------------|--------|
| 1   | 8.206                | 1675962 | 360092      | 100.00 |
| Sum |                      |         |             | 100.0  |

**8e @254 nm**

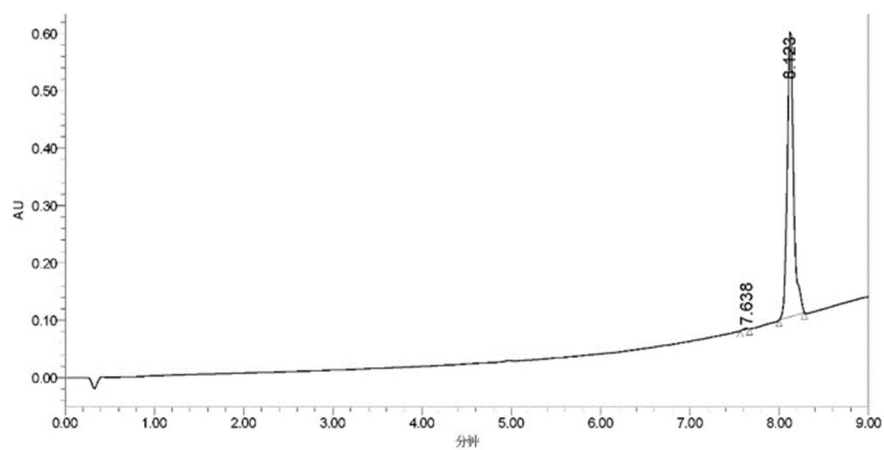

|     | Retention Time (Min) | Area    | Peak Height | %Area |
|-----|----------------------|---------|-------------|-------|
| 1   | 7.638                | 6176    | 1425        | 0.25  |
| 2   | 8.123                | 2485967 | 496974      | 99.75 |
| Sum |                      |         |             | 100.0 |

**8e' @230 nm**

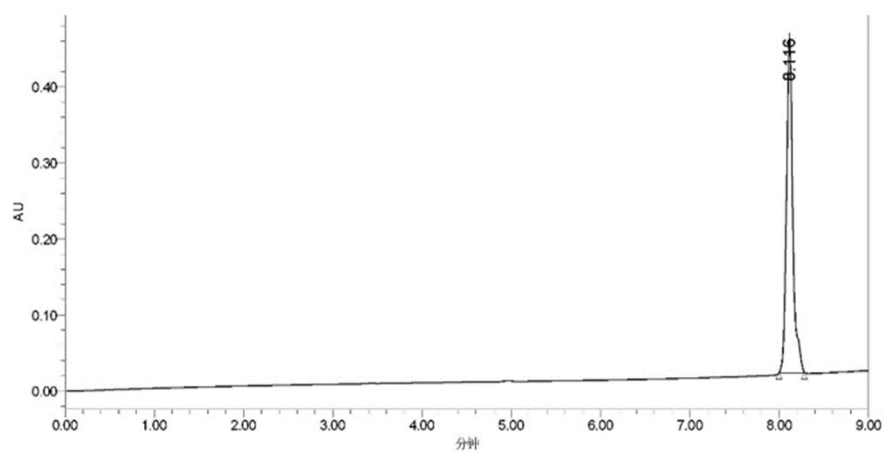

|     | Retention Time (Min) | Area    | Peak Height | %Area  |
|-----|----------------------|---------|-------------|--------|
| 1   | 8.116                | 2177366 | 438310      | 100.00 |
| Sum |                      |         |             | 100.0  |

**8e' @254 nm**

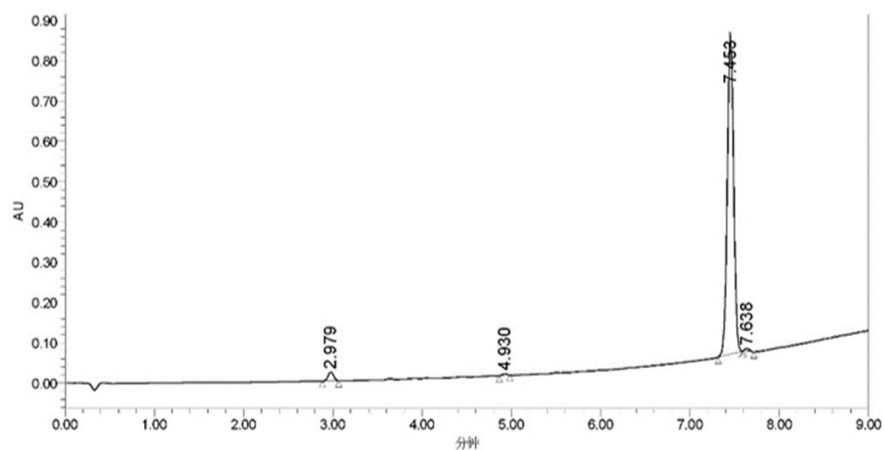

|     | Retention Time (Min) | Area    | Peak Height | %Area |
|-----|----------------------|---------|-------------|-------|
| 1   | 2.979                | 94990   | 21900       | 2.34  |
| 2   | 4.930                | 16665   | 4411        | 0.41  |
| 3   | 7.453                | 3922710 | 791069      | 96.72 |
| 4   | 7.638                | 21569   | 6357        | 0.53  |
| Sum |                      |         |             | 100.0 |

8f @230 nm

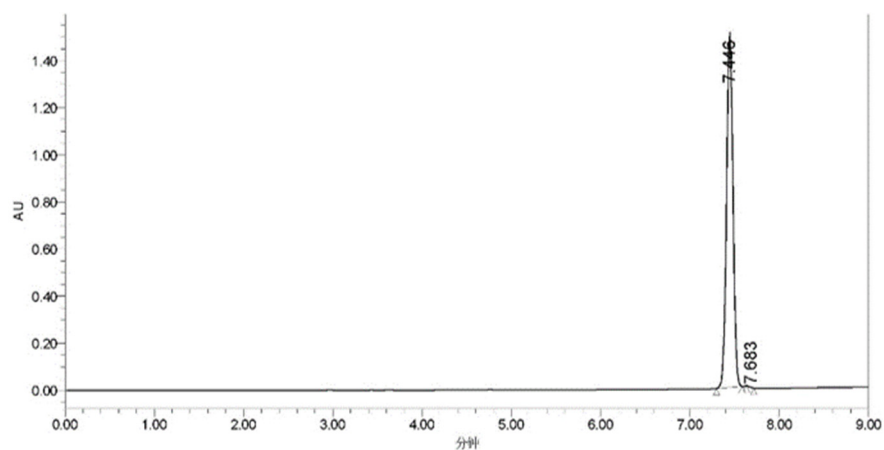

|     | Retention Time (Min) | Area    | Peak Height | %Area |
|-----|----------------------|---------|-------------|-------|
| 1   | 7.446                | 7555475 | 1494276     | 99.94 |
| 2   | 7.683                | 4538    | -1810       | 0.06  |
| Sum |                      |         |             | 100.0 |

8f @254 nm

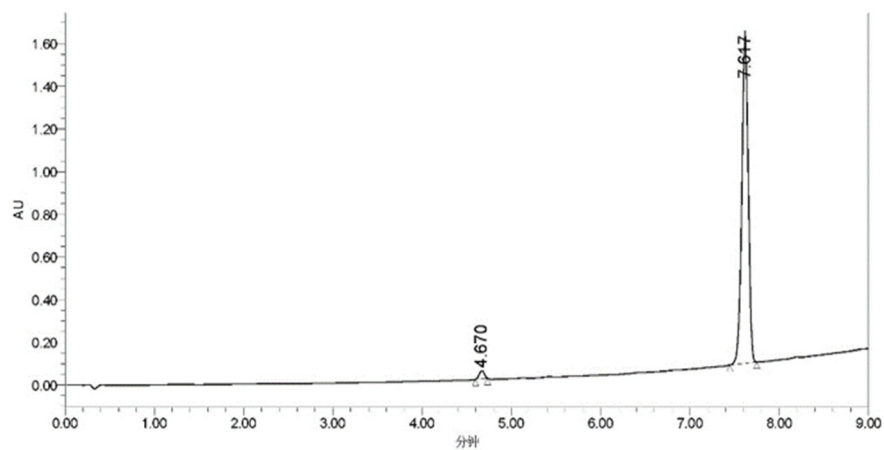

|     | Retention Time (Min) | Area    | Peak Height | %Area |
|-----|----------------------|---------|-------------|-------|
| 1   | 4.670                | 153312  | 37476       | 1.94  |
| 2   | 7.617                | 7752207 | 1536798     | 98.06 |
| Sum |                      |         |             | 100.0 |

**8g @230 nm**

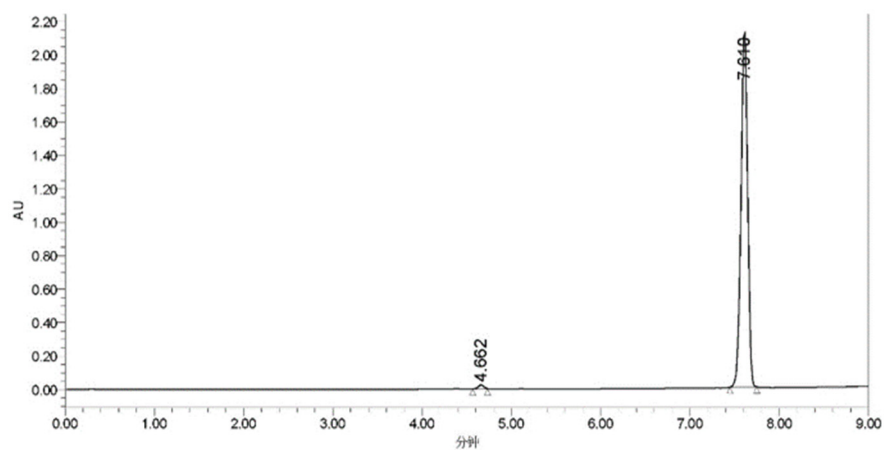

|     | Retention Time (Min) | Area     | Peak Height | %Area |
|-----|----------------------|----------|-------------|-------|
| 1   | 4.662                | 101634   | 23332       | 0.91  |
| 2   | 7.610                | 11063573 | 2127915     | 99.09 |
| Sum |                      |          |             | 100.0 |

**8g @254 nm**



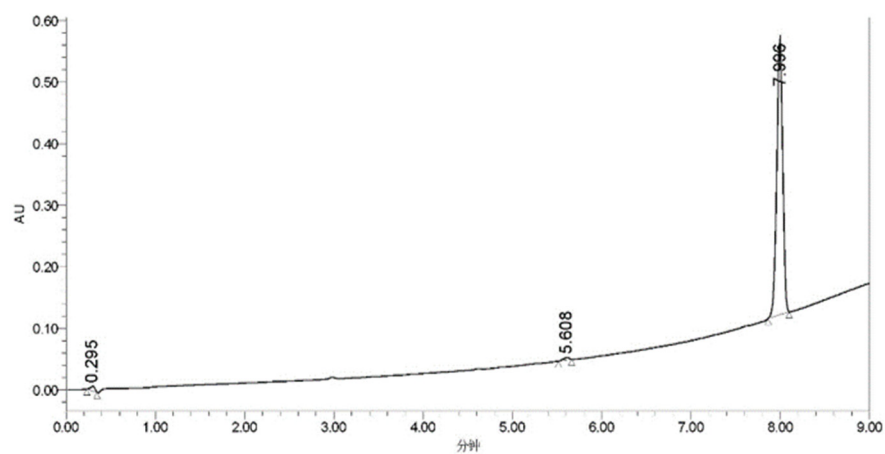

|     | Retention Time (Min) | Area    | Peak Height | %Area |
|-----|----------------------|---------|-------------|-------|
| 1   | 0.295                | 28697   | 7538        | 1.34  |
| 2   | 5.608                | 19060   | 4319        | 0.89  |
| 3   | 7.996                | 2095333 | 448464      | 97.77 |
| Sum |                      |         |             | 100.0 |

**8h @230 nm**

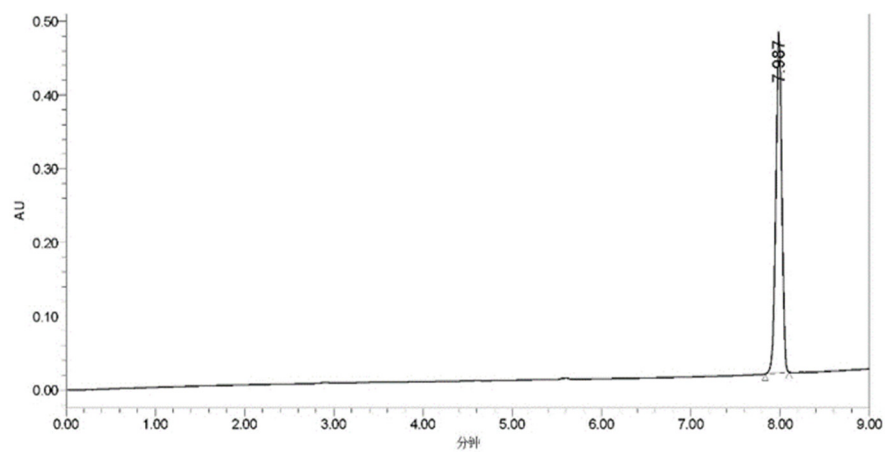

|     | Retention Time (Min) | Area    | Peak Height | %Area  |
|-----|----------------------|---------|-------------|--------|
| 1   | 7.987                | 2148181 | 456784      | 100.00 |
| Sum |                      |         |             | 100.0  |

**8h @254 nm**

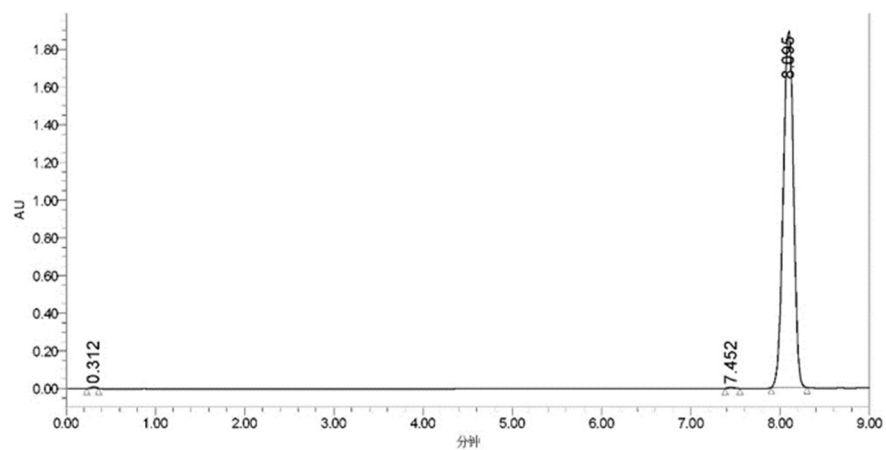

|     | Retention Time (Min) | Area     | Peak Height | %Area |
|-----|----------------------|----------|-------------|-------|
| 1   | 0.312                | 33476    | 7968        | 0.22  |
| 2   | 7.452                | 26113    | 5471        | 0.17  |
| 3   | 8.095                | 15163366 | 1900237     | 99.61 |
| Sum |                      |          |             | 100.0 |

**8i @230 nm**

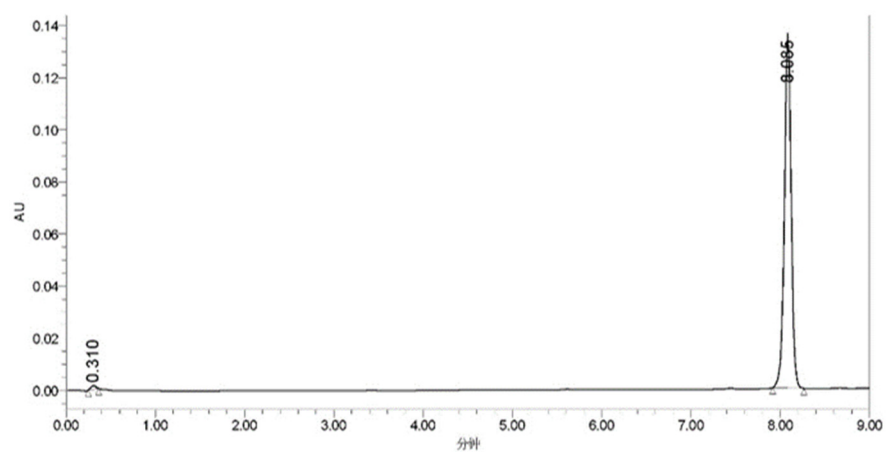

|     | Retention Time (Min) | Area   | Peak Height | %Area |
|-----|----------------------|--------|-------------|-------|
| 1   | 0.310                | 5630   | 1364        | 0.78  |
| 2   | 8.085                | 716664 | 134501      | 99.22 |
| Sum |                      |        |             | 100.0 |

**8i @254 nm**

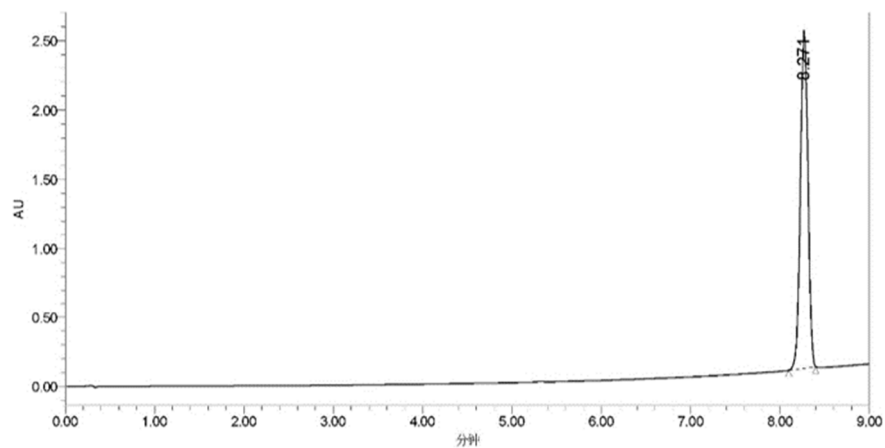

|     | Retention Time (Min) | Area     | Peak Height | %Area  |
|-----|----------------------|----------|-------------|--------|
| 1   | 8.271                | 14275825 | 2438632     | 100.00 |
| Sum |                      |          |             | 100.0  |

**8j @230 nm**

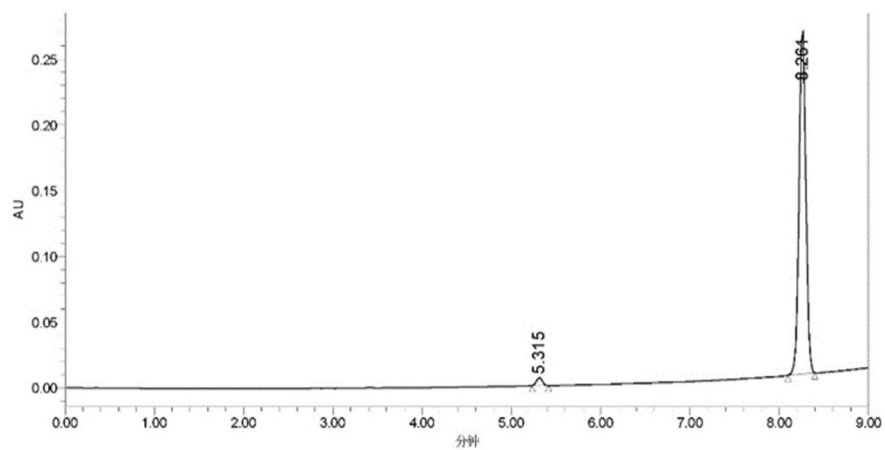

|     | Retention Time (Min) | Area    | Peak Height | %Area |
|-----|----------------------|---------|-------------|-------|
| 1   | 5.315                | 26612   | 5958        | 1.90  |
| 2   | 8.261                | 1374108 | 260258      | 98.10 |
| Sum |                      |         |             | 100.0 |

**8j @254 nm**

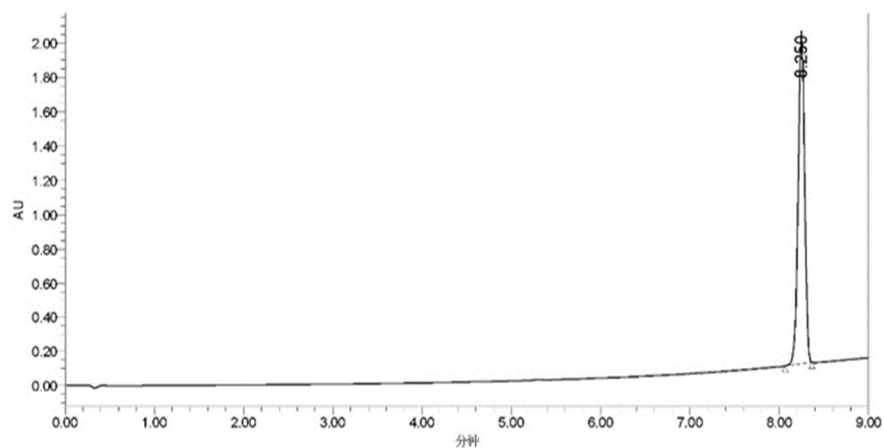

|     | Retention Time (Min) | Area    | Peak Height | %Area  |
|-----|----------------------|---------|-------------|--------|
| 1   | 8.250                | 9677612 | 1914859     | 100.00 |
| Sum |                      |         |             | 100.0  |

8k @230 nm

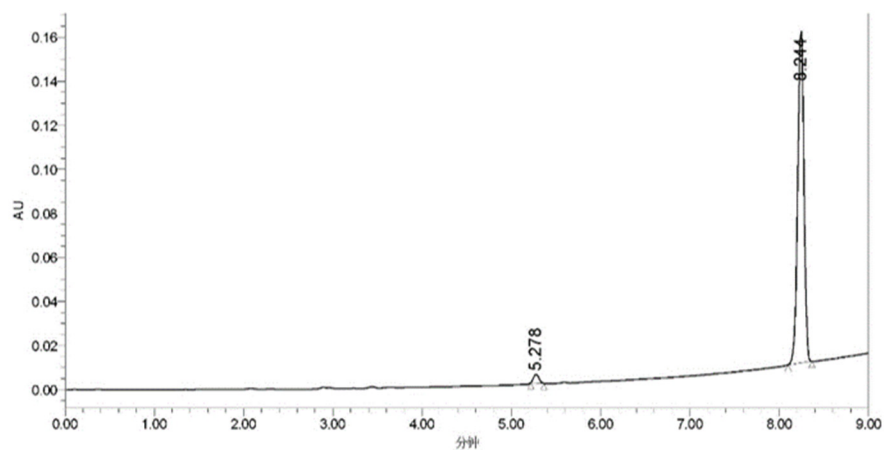

|     | Retention Time (Min) | Area   | Peak Height | %Area |
|-----|----------------------|--------|-------------|-------|
| 1   | 5.278                | 16720  | 3949        | 2.23  |
| 2   | 8.244                | 732674 | 150358      | 97.77 |
| Sum |                      |        |             | 100.0 |

8k @254 nm

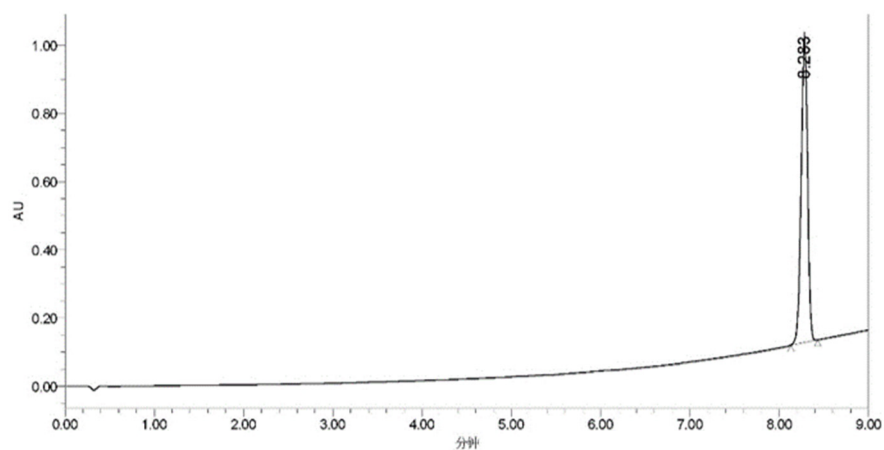

|     | Retention<br>Time (Min) | Area    | Peak<br>Height | %Area  |
|-----|-------------------------|---------|----------------|--------|
| 1   | 8.283                   | 4394914 | 896119         | 100.00 |
| Sum |                         |         |                | 100.0  |

**8l @230 nm**

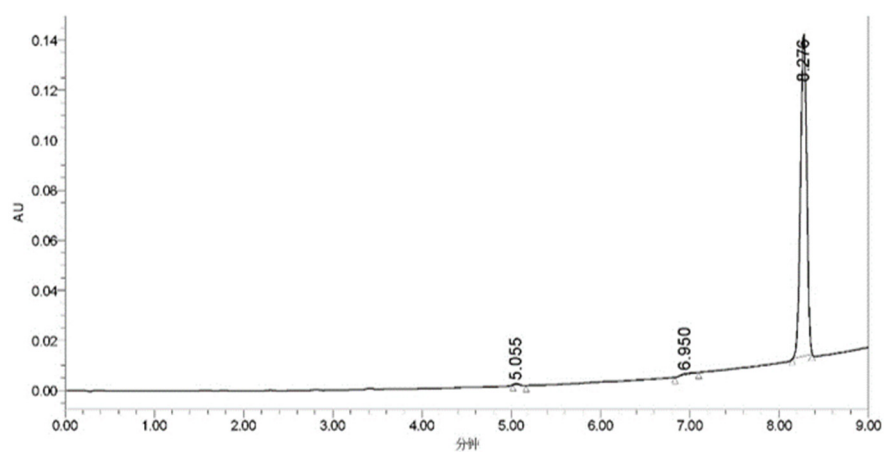

|     | Retention<br>Time (Min) | Area   | Peak<br>Height | %Area |
|-----|-------------------------|--------|----------------|-------|
| 1   | 5.055                   | 1958   | 559            | 0.31  |
| 2   | 6.950                   | 4893   | 630            | 0.79  |
| 3   | 8.276                   | 616157 | 129156         | 98.90 |
| Sum |                         |        |                | 100.0 |

**8l @254 nm**

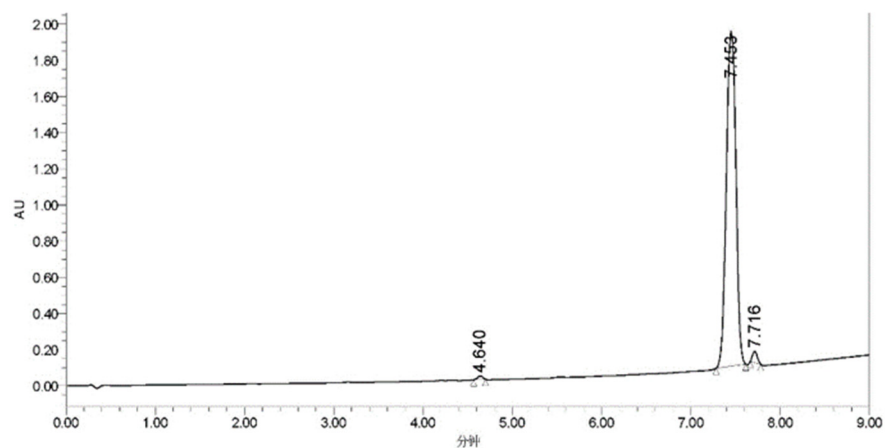

|     | Retention Time (Min) | Area     | Peak Height | %Area |
|-----|----------------------|----------|-------------|-------|
| 1   | 4.640                | 79863    | 19759       | 0.56  |
| 2   | 7.453                | 13857102 | 1860809     | 97.77 |
| 3   | 7.716                | 236879   | 62615       | 1.67  |
| Sum |                      |          |             | 100.0 |

8m @ 230 nm

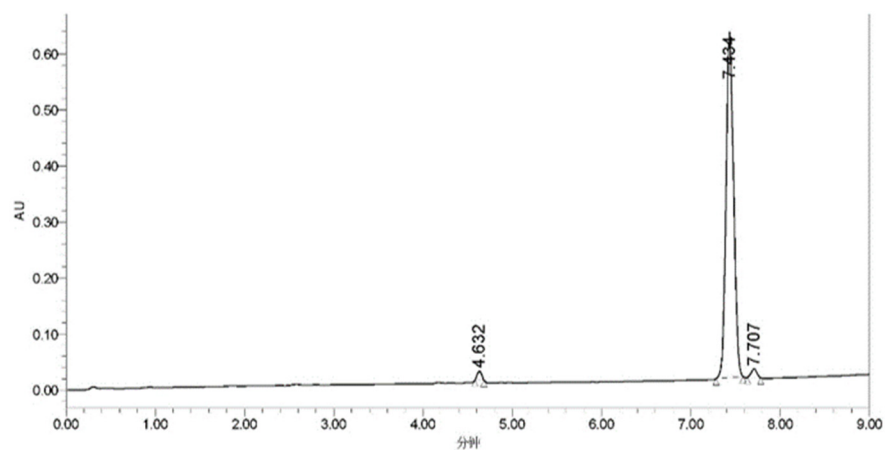

|     | Retention Time (Min) | Area    | Peak Height | %Area |
|-----|----------------------|---------|-------------|-------|
| 1   | 4.632                | 56442   | 16381       | 1.50  |
| 2   | 7.434                | 3635720 | 611563      | 96.67 |
| 3   | 7.707                | 68619   | 15619       | 1.82  |
| Sum |                      |         |             | 100.0 |

8m @254 nm

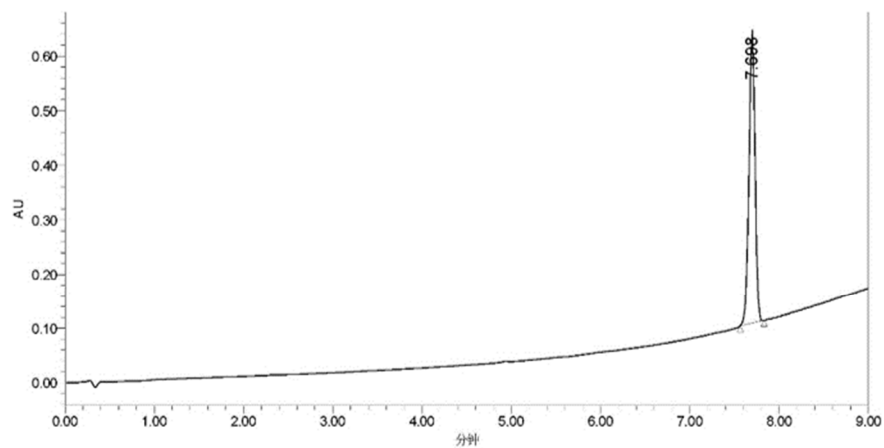

|     | Retention Time (Min) | Area    | Peak Height | %Area  |
|-----|----------------------|---------|-------------|--------|
| 1   | 7.698                | 2587324 | 530259      | 100.00 |
| Sum |                      |         |             | 100.0  |

**8n @230 nm**

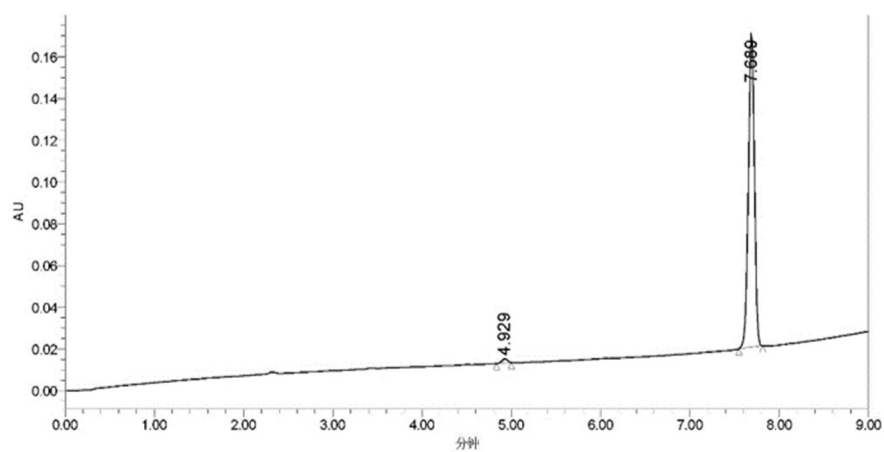

|     | Retention Time (Min) | Area   | Peak Height | %Area |
|-----|----------------------|--------|-------------|-------|
| 1   | 4.929                | 8888   | 2016        | 1.22  |
| 2   | 7.689                | 721247 | 149876      | 98.78 |
| Sum |                      |        |             | 100.0 |

**8n @254 nm**

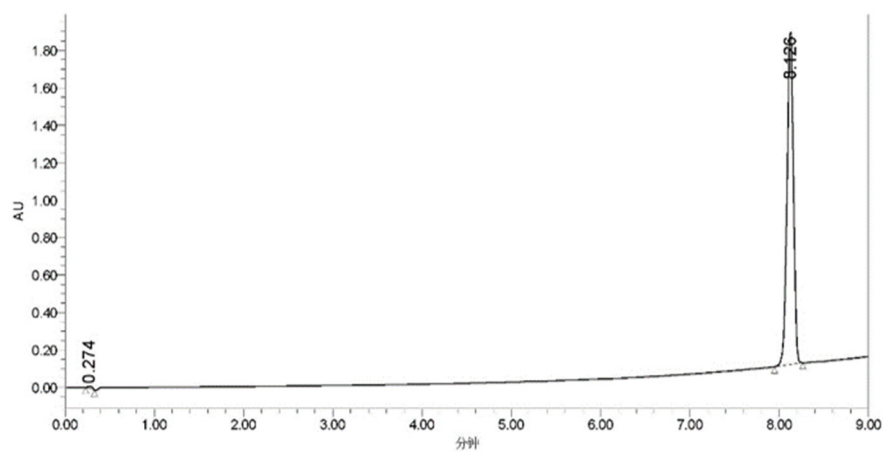

|     | Retention Time (Min) | Area    | Peak Height | %Area |
|-----|----------------------|---------|-------------|-------|
| 1   | 0.274                | 40309   | 10891       | 0.45  |
| 2   | 8.126                | 8893775 | 1782955     | 99.55 |
| Sum |                      |         |             | 100.0 |

**8p @230 nm**

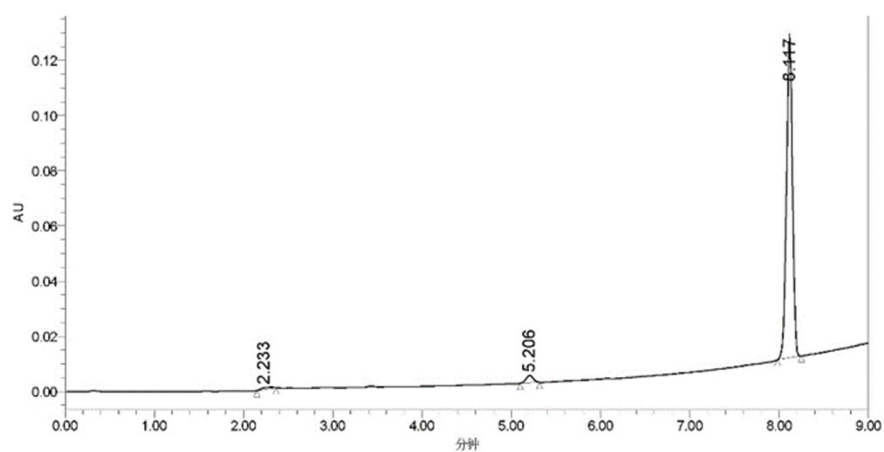

|     | Retention Time (Min) | Area   | Peak Height | %Area |
|-----|----------------------|--------|-------------|-------|
| 1   | 2.233                | 5741   | 684         | 1.02  |
| 2   | 5.206                | 14876  | 2669        | 2.64  |
| 3   | 8.117                | 543831 | 115465      | 96.35 |
| Sum |                      |        |             | 100.0 |

**8p @254 nm**



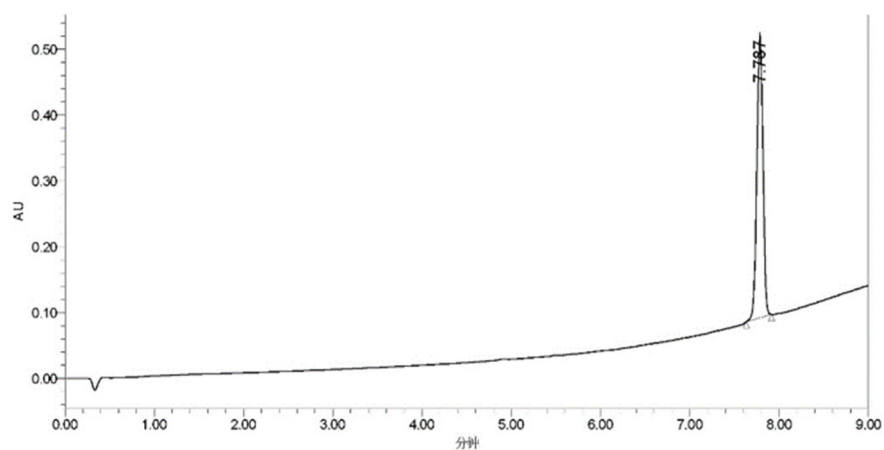

|     | Retention Time (Min) | Area    | Peak Height | %Area  |
|-----|----------------------|---------|-------------|--------|
| 1   | 7.787                | 2019234 | 428278      | 100.00 |
| Sum |                      |         |             | 100.0  |

**8q @230 nm**

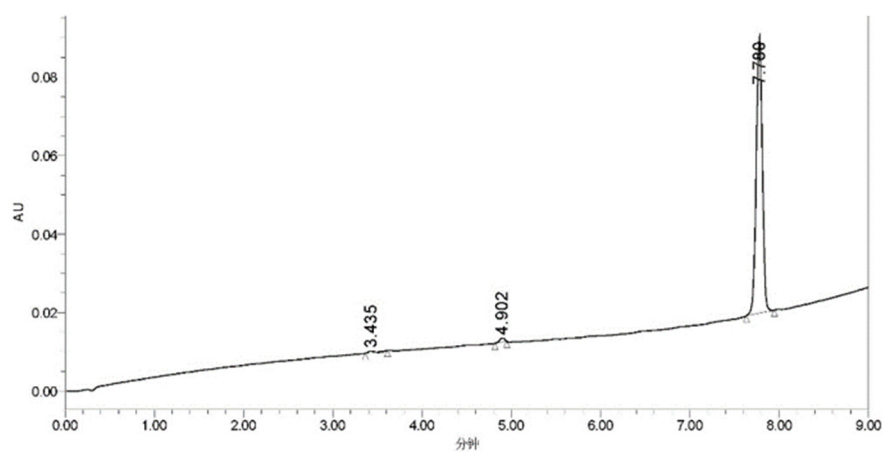

|     | Retention Time (Min) | Area   | Peak Height | %Area |
|-----|----------------------|--------|-------------|-------|
| 1   | 3.435                | 2320   | 334         | 0.69  |
| 2   | 4.902                | 4092   | 1055        | 1.21  |
| 3   | 7.780                | 332184 | 70302       | 98.11 |
| Sum |                      |        |             | 100.0 |

**8q @254 nm**

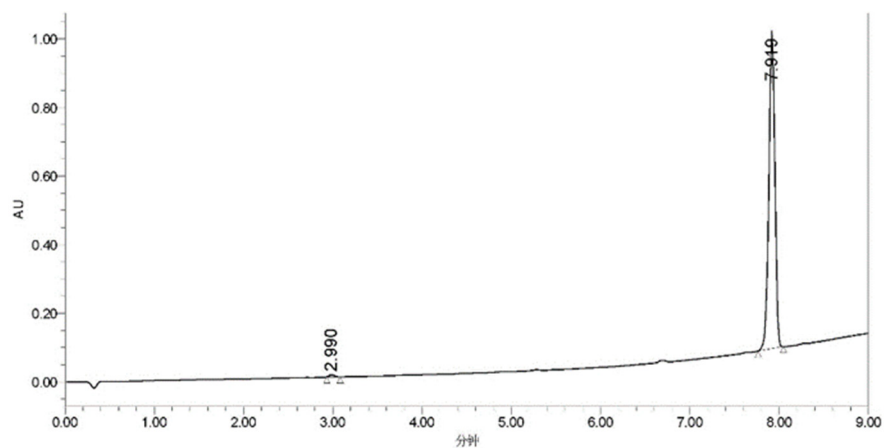

|     | Retention Time (Min) | Area    | Peak Height | %Area |
|-----|----------------------|---------|-------------|-------|
| 1   | 2.990                | 25183   | 6488        | 0.57  |
| 2   | 7.919                | 4376667 | 914093      | 99.43 |
| Sum |                      |         |             | 100.0 |

**8r @230 nm**

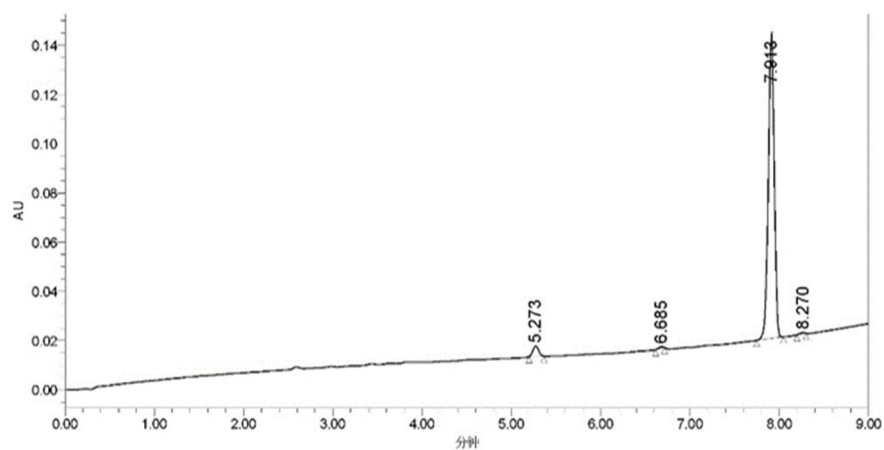

|     | Retention Time (Min) | Area   | Peak Height | %Area |
|-----|----------------------|--------|-------------|-------|
| 1   | 5.273                | 19123  | 4260        | 3.20  |
| 2   | 6.685                | 2450   | 724         | 0.41  |
| 3   | 7.913                | 574393 | 123219      | 96.13 |
| 4   | 8.270                | 1572   | 427         | 0.26  |
| Sum |                      |        |             | 100.0 |

**8r @254 nm**

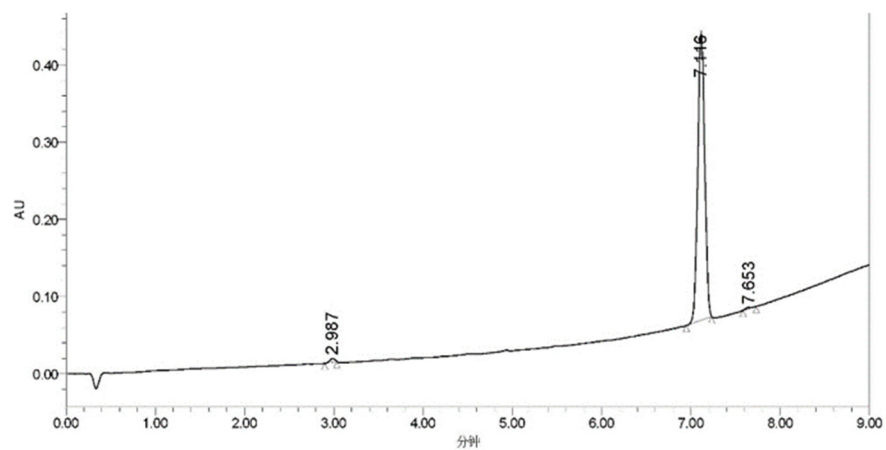

|     | Retention Time (Min) | Area    | Peak Height | %Area |
|-----|----------------------|---------|-------------|-------|
| 1   | 2.987                | 18652   | 5153        | 0.93  |
| 2   | 7.116                | 1979638 | 371106      | 98.73 |
| 3   | 7.653                | 6896    | 1498        | 0.34  |
| Sum |                      |         |             | 100.0 |

**8s @230 nm**

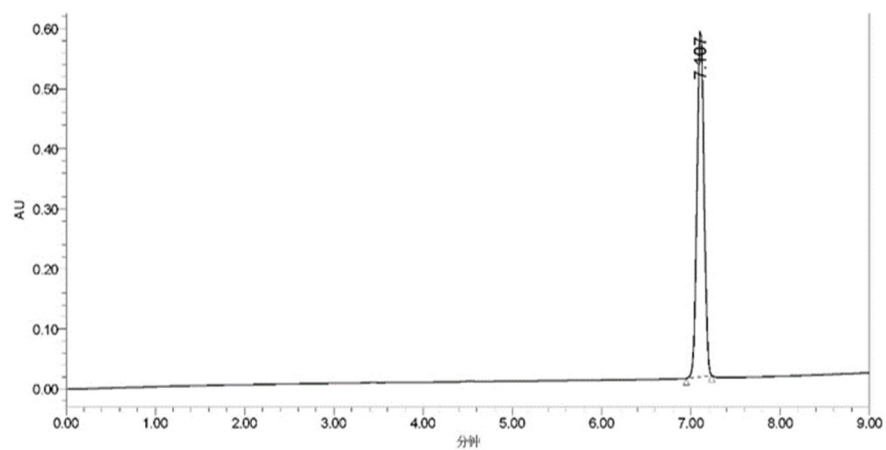

|     | Retention Time (Min) | Area    | Peak Height | %Area  |
|-----|----------------------|---------|-------------|--------|
| 1   | 7.107                | 3108200 | 578801      | 100.00 |
| Sum |                      |         |             | 100.0  |

**8s @254 nm**

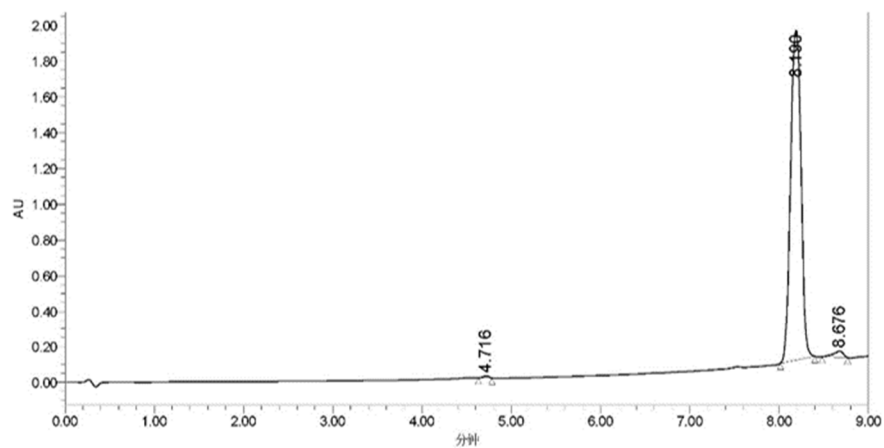

|     | Retention Time (Min) | Area     | Peak Height | %Area |
|-----|----------------------|----------|-------------|-------|
| 1   | 4.716                | 48259    | 10737       | 0.31  |
| 2   | 8.190                | 15108555 | 1860735     | 97.98 |
| 3   | 8.676                | 262925   | 34746       | 1.71  |
| Sum |                      |          |             | 100.0 |

8t @230 nm

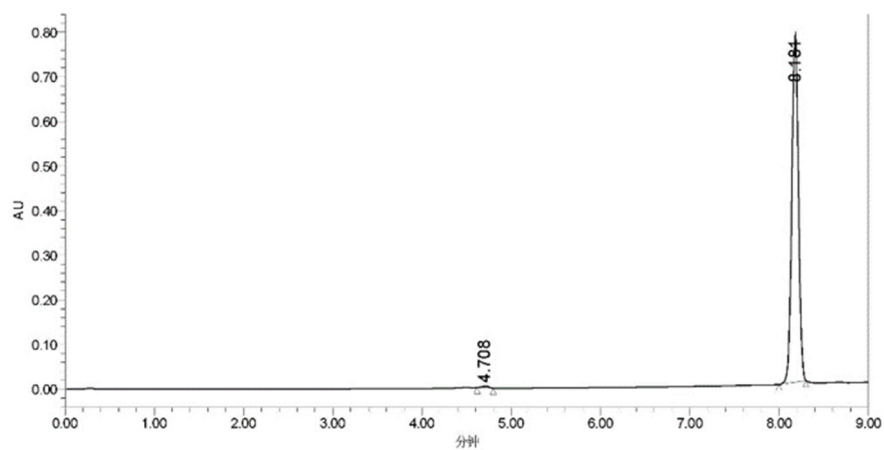

|     | Retention Time (Min) | Area    | Peak Height | %Area |
|-----|----------------------|---------|-------------|-------|
| 1   | 4.708                | 20276   | 4212        | 0.50  |
| 2   | 8.181                | 4031042 | 777141      | 99.50 |
| Sum |                      |         |             | 100.0 |

8t @254 nm

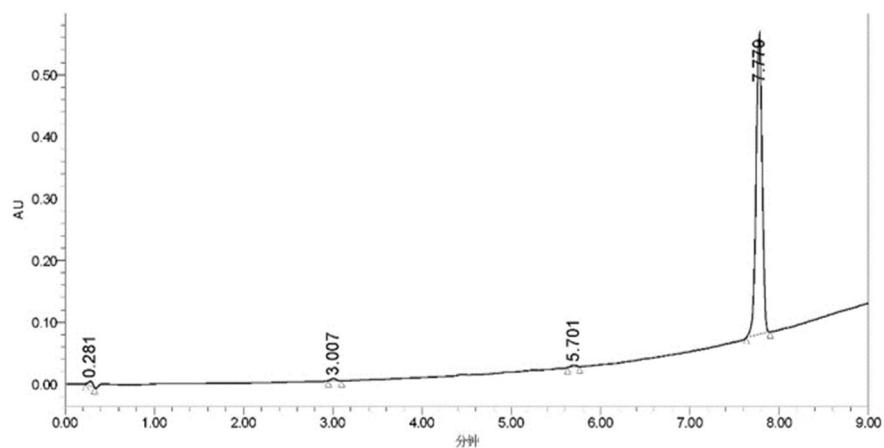

|     | Retention Time (Min) | Area    | Peak Height | %Area |
|-----|----------------------|---------|-------------|-------|
| 1   | 0.281                | 25269   | 7117        | 1.08  |
| 2   | 3.007                | 13699   | 3508        | 0.59  |
| 3   | 5.701                | 13003   | 3113        | 0.56  |
| 4   | 7.779                | 2281215 | 485595      | 97.77 |
| Sum |                      |         |             | 100.0 |

**8u @230 nm**

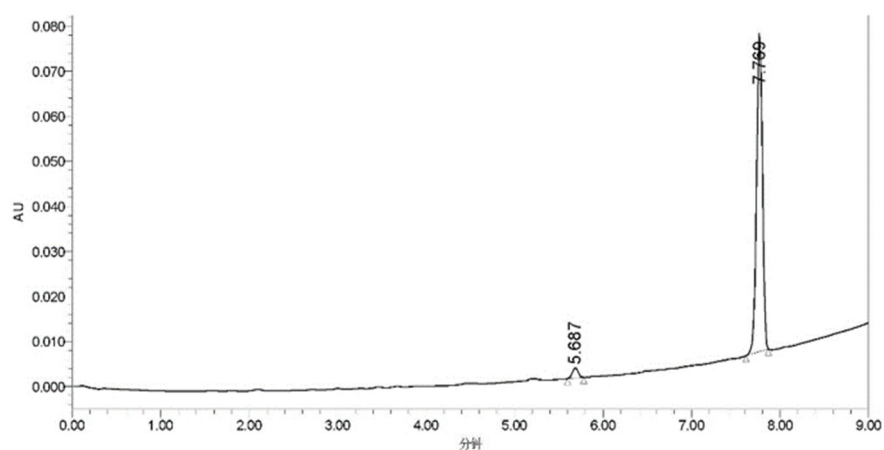

|     | Retention Time (Min) | Area   | Peak Height | %Area |
|-----|----------------------|--------|-------------|-------|
| 1   | 5.687                | 10358  | 2251        | 3.10  |
| 2   | 7.769                | 323637 | 69631       | 96.90 |
| Sum |                      |        |             | 100.0 |

**8u @254 nm**

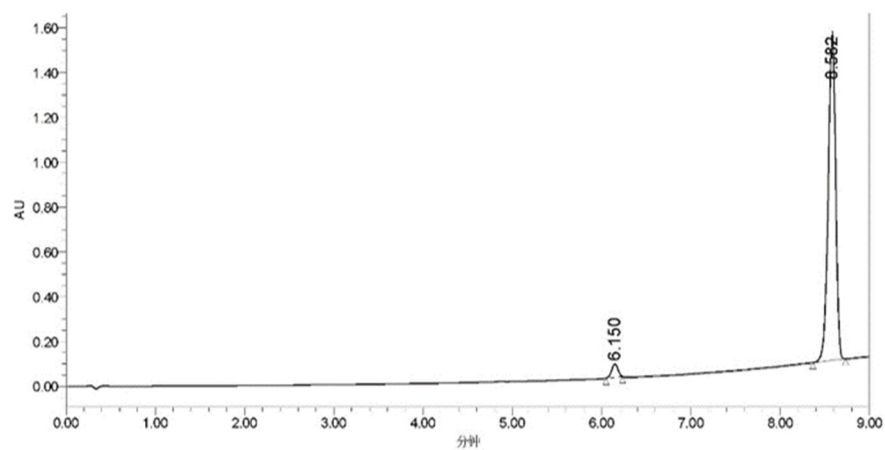

|     | Retention Time (Min) | Area    | Peak Height | %Area |
|-----|----------------------|---------|-------------|-------|
| 1   | 6.150                | 290201  | 59348       | 3.35  |
| 2   | 8.582                | 8373266 | 1456211     | 96.65 |
| Sum |                      |         |             | 100.0 |

8v @230 nm

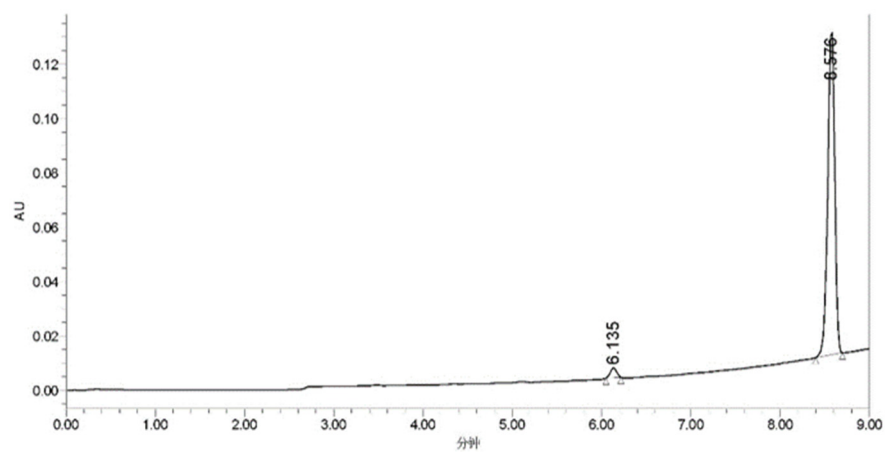

|     | Retention Time (Min) | Area   | Peak Height | %Area |
|-----|----------------------|--------|-------------|-------|
| 1   | 6.135                | 18220  | 3687        | 2.74  |
| 2   | 8.576                | 647484 | 119307      | 97.26 |
| Sum |                      |        |             | 100.0 |

8v @254 nm

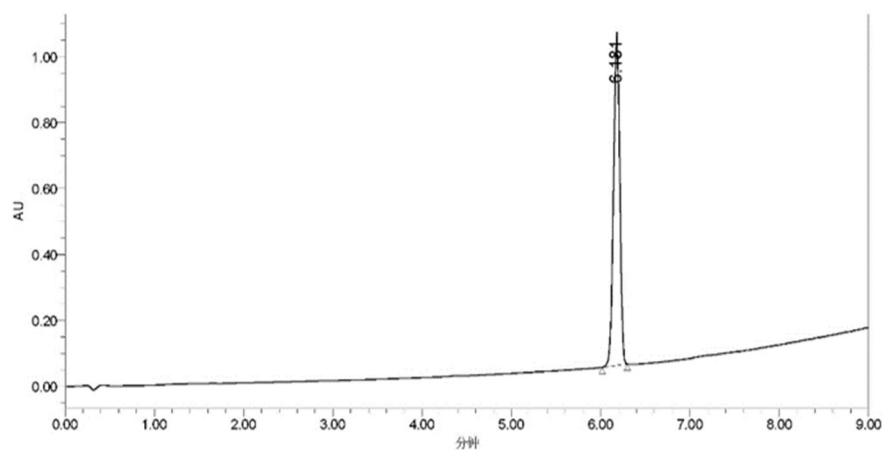

|     | Retention Time (Min) | Area    | Peak Height | %Area  |
|-----|----------------------|---------|-------------|--------|
| 1   | 6.181                | 4827709 | 997879      | 100.00 |
| Sum |                      |         |             | 100.0  |

8w @230 nm

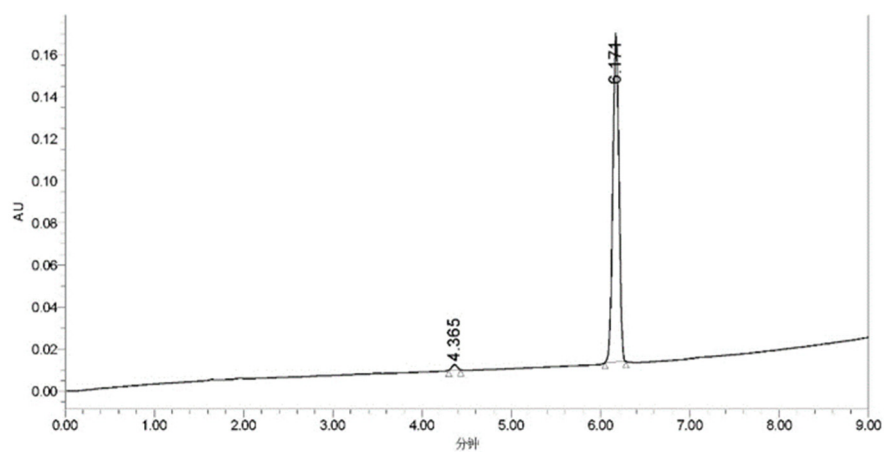

|     | Retention Time (Min) | Area   | Peak Height | %Area |
|-----|----------------------|--------|-------------|-------|
| 1   | 4.365                | 10781  | 2655        | 1.44  |
| 2   | 6.171                | 739405 | 155361      | 98.56 |
| Sum |                      |        |             | 100.0 |

8w @254 nm

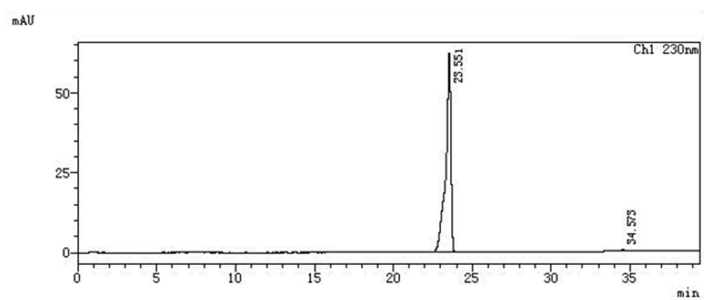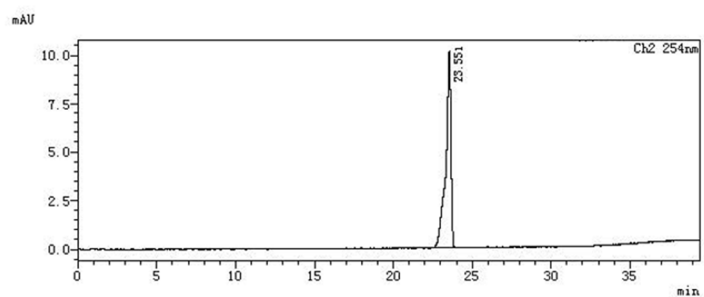

|     | Retention Time (Min) | Area    | Peak Height | %Area   |
|-----|----------------------|---------|-------------|---------|
| 1   | 23.551               | 1394550 | 62226       | 99.687  |
| 2   | 34.573               | 4385    | 251         | 0.313   |
| sum |                      | 1398936 | 62477       | 100.000 |

  

|     | Retention Time (Min) | Area   | Peak Height | %Area   |
|-----|----------------------|--------|-------------|---------|
| 1   | 23.551               | 227530 | 10116       | 100.000 |
| sum |                      | 227530 | 10116       | 100.000 |

**8x @ 230 nm & 254 nm**

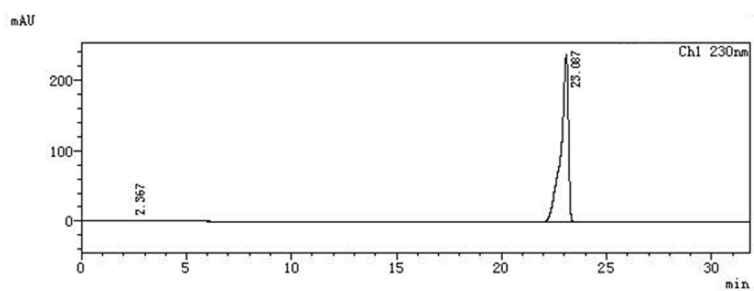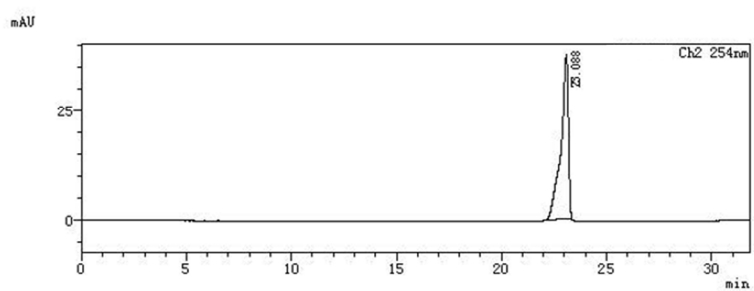

|     | Retention Time (Min) | Area    | Peak Height | %Area   |
|-----|----------------------|---------|-------------|---------|
| 1   | 2.367                | 828     | 156         | 0.014   |
| 2   | 23.067               | 5896083 | 238196      | 99.986  |
| sum |                      | 5896911 | 238351      | 100.000 |

  

|     | Retention Time (Min) | Area   | Peak Height | %Area   |
|-----|----------------------|--------|-------------|---------|
| 1   | 23.068               | 923576 | 37589       | 100.000 |
| sum |                      | 923576 | 37589       | 100.000 |

**8x' @ 230 nm & 254 nm**



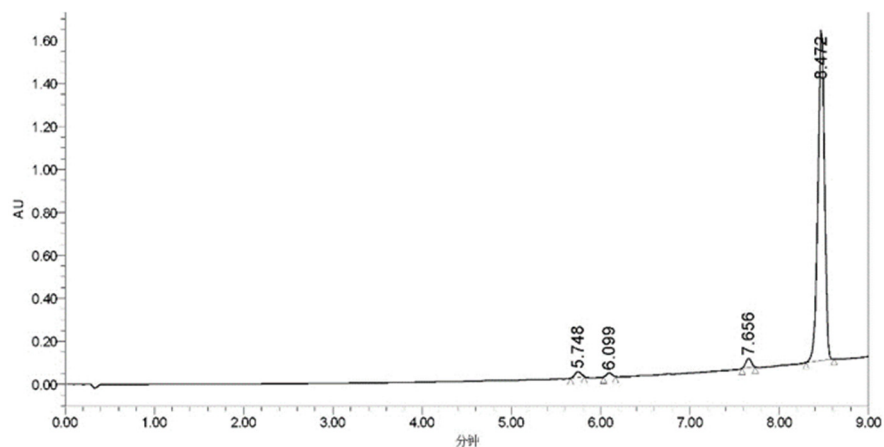

|     | Retention Time (Min) | Area    | Peak Height | %Area |
|-----|----------------------|---------|-------------|-------|
| 1   | 5.748                | 120733  | 25381       | 1.45  |
| 2   | 6.099                | 74262   | 18218       | 0.89  |
| 3   | 7.656                | 192204  | 44353       | 2.31  |
| 4   | 8.472                | 7924302 | 1531733     | 95.34 |
| Sum |                      |         |             | 100.0 |

8y @230 nm

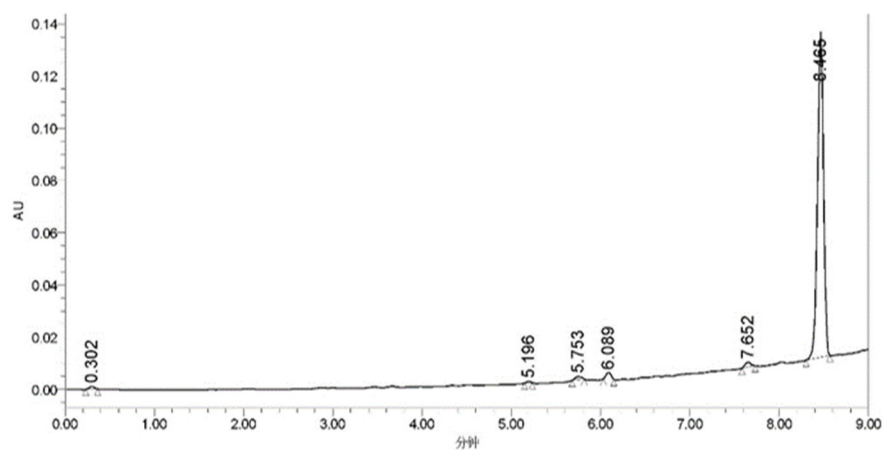

|     | Retention Time (Min) | Area   | Peak Height | %Area |
|-----|----------------------|--------|-------------|-------|
| 1   | 0.302                | 4365   | 1080        | 0.72  |
| 2   | 5.196                | 1814   | 591         | 0.30  |
| 3   | 5.753                | 5808   | 1224        | 0.95  |
| 4   | 6.089                | 9535   | 2479        | 1.56  |
| 5   | 7.652                | 7792   | 1832        | 1.28  |
| 6   | 8.465                | 580427 | 122481      | 95.19 |
| Sum |                      |        |             | 100.0 |

8y @254 nm

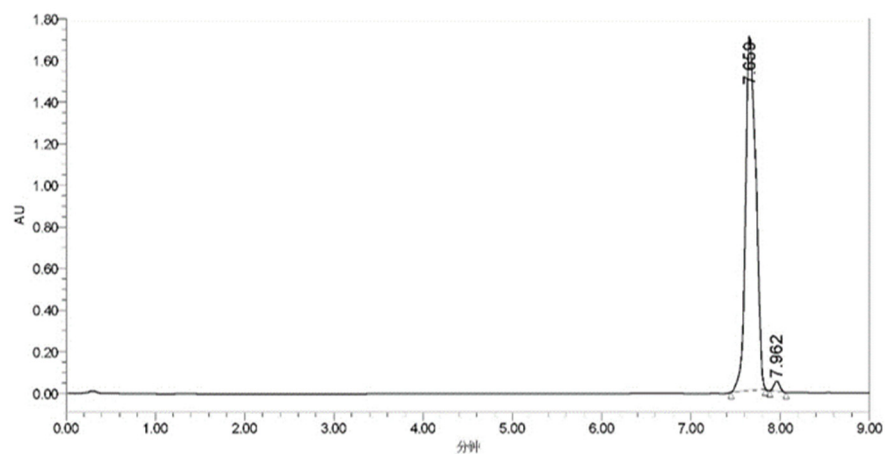

|     | Retention Time (Min) | Area     | Peak Height | %Area |
|-----|----------------------|----------|-------------|-------|
| 1   | 7.659                | 13794786 | 1717847     | 98.39 |
| 2   | 7.962                | 225797   | 49018       | 1.61  |
| Sum |                      |          |             | 100.0 |

**8ab @230 nm**

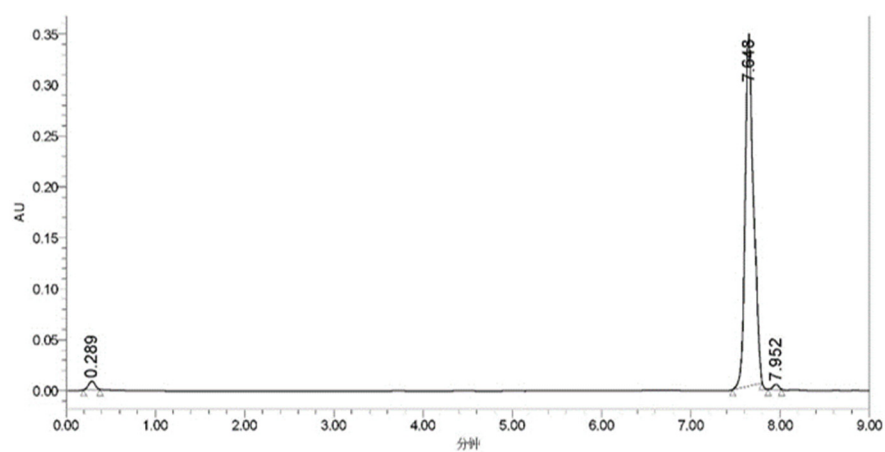

|     | Retention Time (Min) | Area    | Peak Height | %Area |
|-----|----------------------|---------|-------------|-------|
| 1   | 0.289                | 41426   | 8156        | 1.77  |
| 2   | 7.648                | 2278634 | 342272      | 97.36 |
| 3   | 7.952                | 20411   | 4722        | 0.87  |
| Sum |                      |         |             | 100.0 |

**8ab @254 nm**

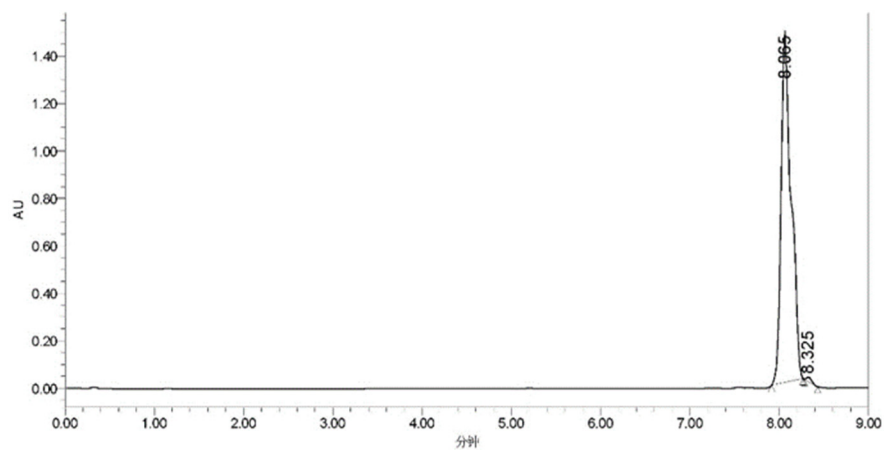

|     | Retention Time (Min) | Area     | Peak Height | %Area |
|-----|----------------------|----------|-------------|-------|
| 1   | 8.065                | 11479958 | 1467099     | 99.39 |
| 2   | 8.325                | 70934    | 17648       | 0.61  |
| Sum |                      |          |             | 100.0 |

**8ac @230 nm**

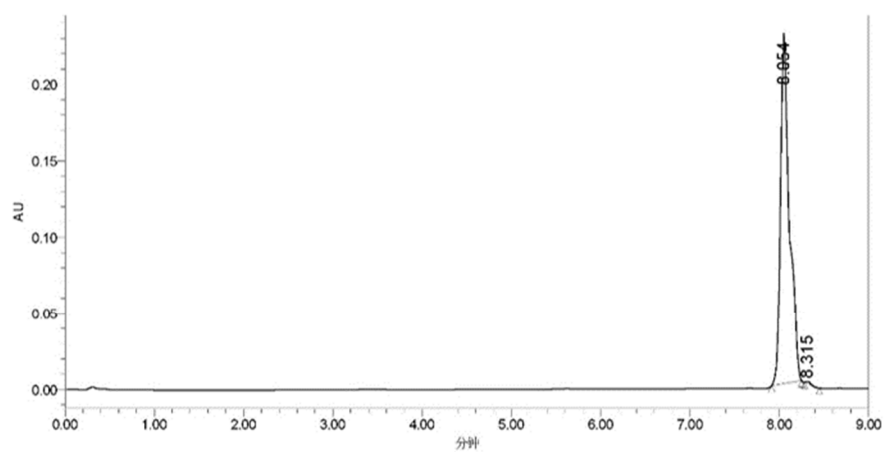

|     | Retention Time (Min) | Area    | Peak Height | %Area |
|-----|----------------------|---------|-------------|-------|
| 1   | 8.054                | 1568607 | 227623      | 99.62 |
| 2   | 8.315                | 6042    | 1285        | 0.38  |
| Sum |                      |         |             | 100.0 |

**8ac @254 nm**

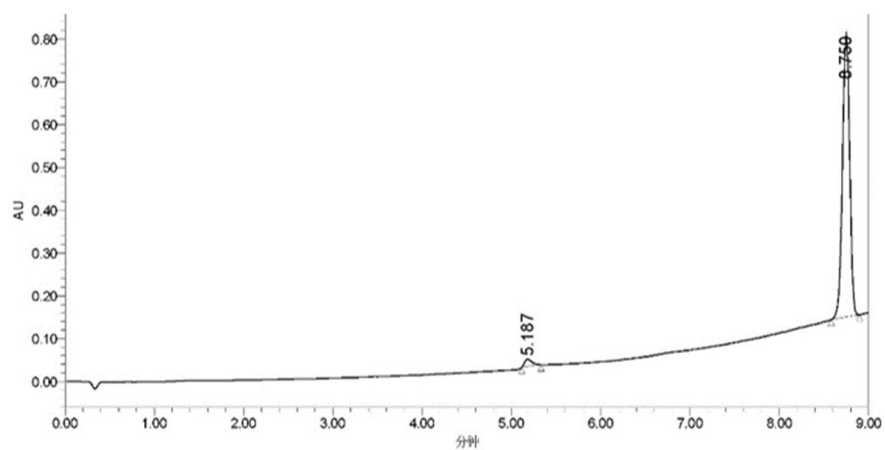

|     | Retention Time (Min) | Area    | Peak Height | %Area |
|-----|----------------------|---------|-------------|-------|
| 1   | 5.187                | 100580  | 17098       | 2.67  |
| 2   | 8.750                | 3660328 | 659564      | 97.33 |
| Sum |                      |         |             | 100.0 |

**8ad @230 nm**

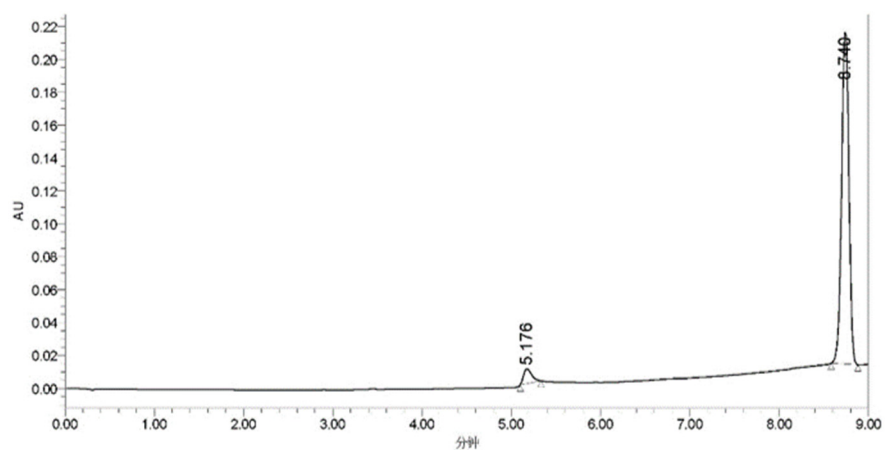

|     | Retention Time (Min) | Area    | Peak Height | %Area |
|-----|----------------------|---------|-------------|-------|
| 1   | 5.176                | 57159   | 9181        | 4.82  |
| 2   | 8.740                | 1127704 | 202679      | 95.18 |
| Sum |                      |         |             | 100.0 |

**8ad @254 nm**

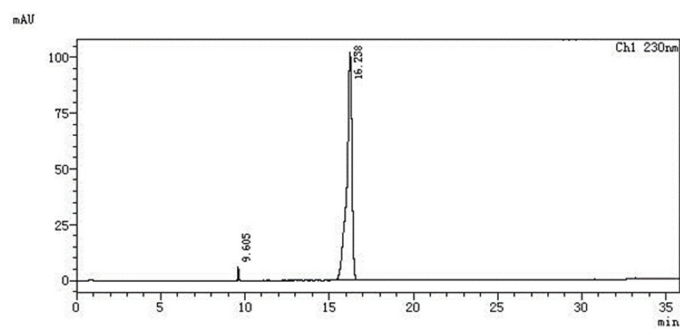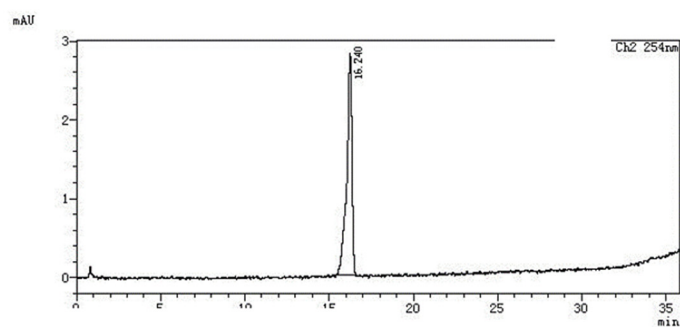

|     | Retention Time (Min) | Area    | Peak Height | %Area   |
|-----|----------------------|---------|-------------|---------|
| 1   | 9.605                | 17884   | 6055        | 0.814   |
| 2   | 16.238               | 2178856 | 102165      | 99.186  |
| sum |                      | 2196740 | 108220      | 100.000 |

  

|     | Retention Time (Min) | Area  | Peak Height | %Area   |
|-----|----------------------|-------|-------------|---------|
| 1   | 16.240               | 59924 | 2820        | 100.000 |
| sum |                      | 59924 | 2820        | 100.000 |

**8ae @230 nm & 254 nm**

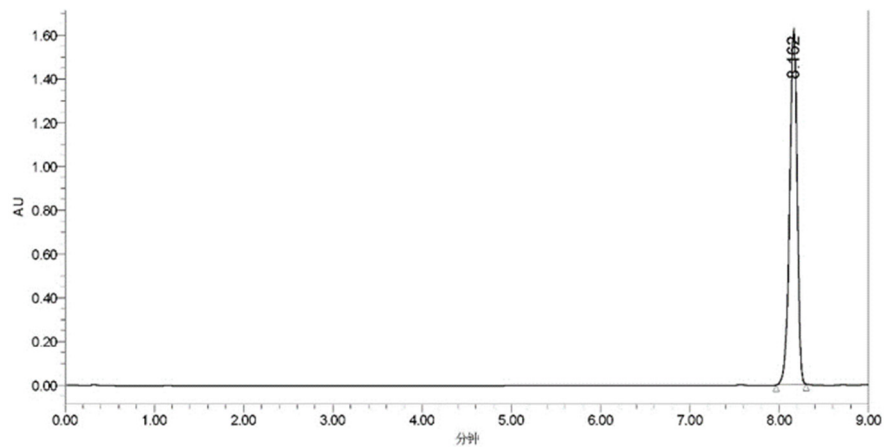

|     | Retention Time (Min) | Area    | Peak Height | %Area  |
|-----|----------------------|---------|-------------|--------|
| 1   | 8.162                | 9551466 | 1622088     | 100.00 |
| Sum |                      |         |             | 100.0  |

**8af @230 nm**

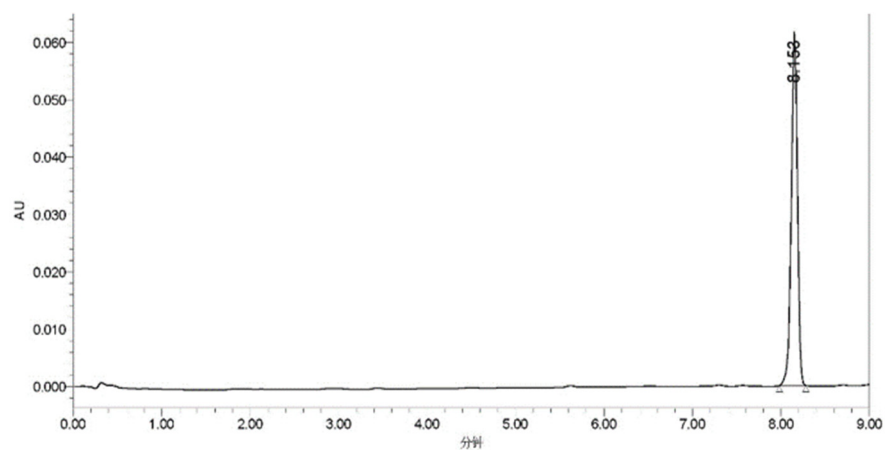

|     | Retention Time (Min) | Area   | Peak Height | %Area  |
|-----|----------------------|--------|-------------|--------|
| 1   | 8.153                | 300110 | 60985       | 100.00 |
| Sum |                      |        |             | 100.0  |

**8af @254 nm**

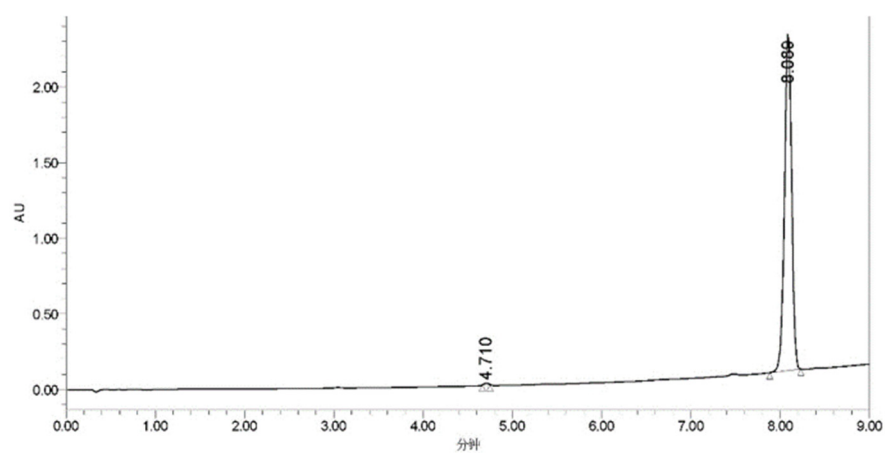

|     | Retention Time (Min) | Area     | Peak Height | %Area |
|-----|----------------------|----------|-------------|-------|
| 1   | 4.710                | 32978    | 10648       | 0.27  |
| 2   | 8.089                | 12407322 | 2223535     | 99.73 |
| Sum |                      |          |             | 100.0 |

**9 @230 nm**

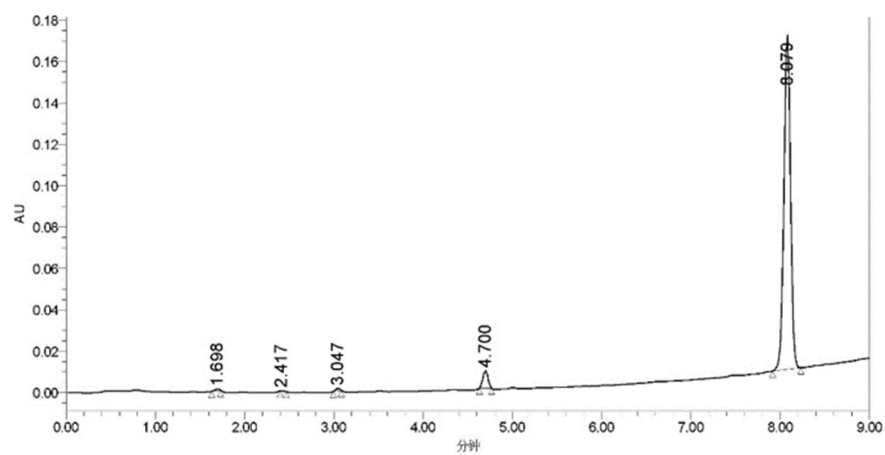

|     | Retention Time (Min) | Area   | Peak Height | %Area |
|-----|----------------------|--------|-------------|-------|
| 1   | 1.698                | 2828   | 851         | 0.33  |
| 2   | 2.417                | 625    | 199         | 0.07  |
| 3   | 3.047                | 3252   | 1057        | 0.38  |
| 4   | 4.700                | 33118  | 8185        | 3.83  |
| 5   | 8.079                | 825477 | 160236      | 95.40 |
| Sum |                      |        |             | 100.0 |

**9 @254 nm**

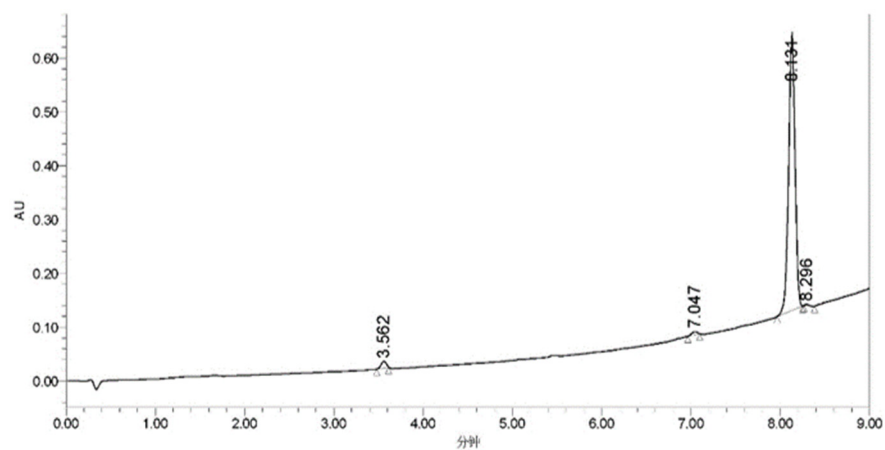

|     | Retention Time (Min) | Area    | Peak Height | %Area |
|-----|----------------------|---------|-------------|-------|
| 1   | 3.562                | 50327   | 12364       | 1.90  |
| 2   | 7.047                | 26328   | 5952        | 0.99  |
| 3   | 8.131                | 2568877 | 510481      | 96.84 |
| 4   | 8.296                | 7194    | 2167        | 0.27  |
| Sum |                      |         |             | 100.0 |

**10 @230 nm**

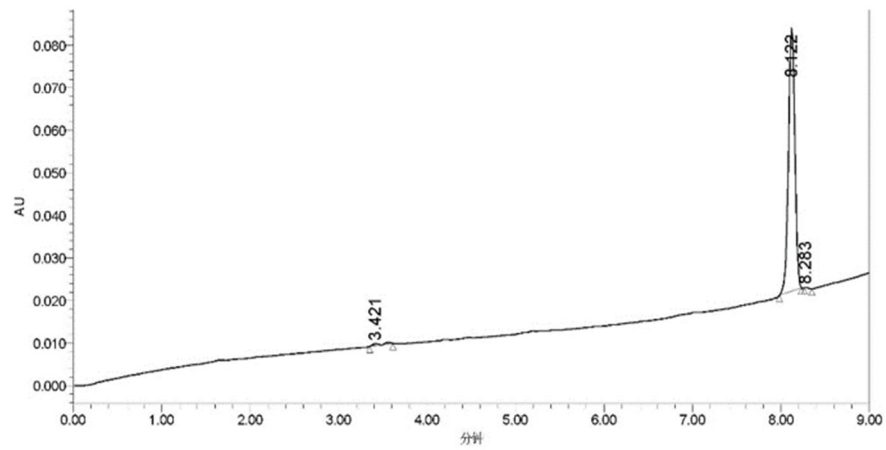

|     | Retention Time (Min) | Area   | Peak Height | %Area |
|-----|----------------------|--------|-------------|-------|
| 1   | 3.421                | 3792   | 506         | 1.20  |
| 2   | 8.122                | 310680 | 61632       | 98.68 |
| 3   | 8.283                | 369    | 151         | 0.12  |
| Sum |                      |        |             | 100.0 |

10 @254 nm

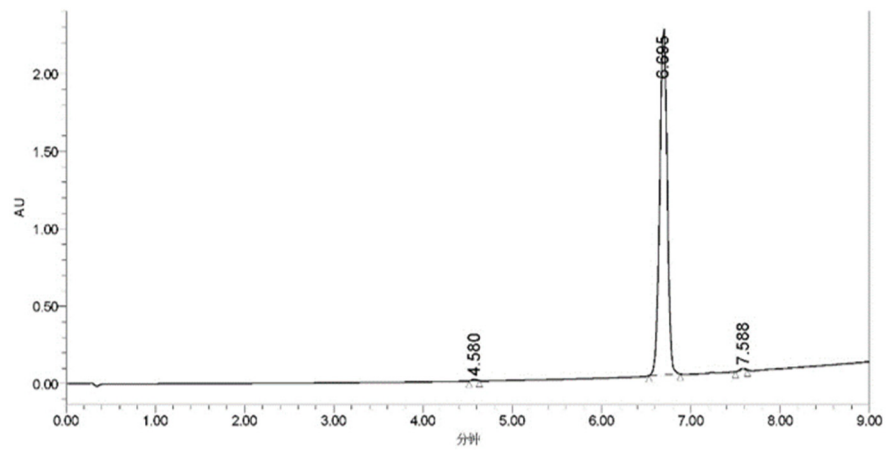

|     | Retention Time (Min) | Area     | Peak Height | %Area |
|-----|----------------------|----------|-------------|-------|
| 1   | 4.580                | 34148    | 8979        | 0.26  |
| 2   | 6.695                | 13089598 | 2231012     | 99.30 |
| 3   | 7.588                | 57518    | 14558       | 0.44  |
| Sum |                      |          |             | 100.0 |

11 @230 nm



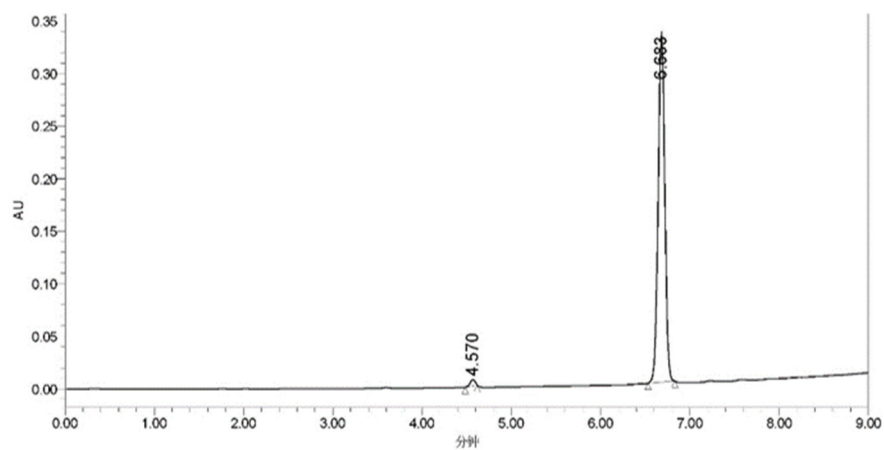

|     | Retention Time (Min) | Area    | Peak Height | %Area |
|-----|----------------------|---------|-------------|-------|
| 1   | 4.570                | 22510   | 6032        | 1.30  |
| 2   | 6.683                | 1703130 | 328971      | 98.70 |
| Sum |                      |         |             | 100.0 |

**11 @254 nm**

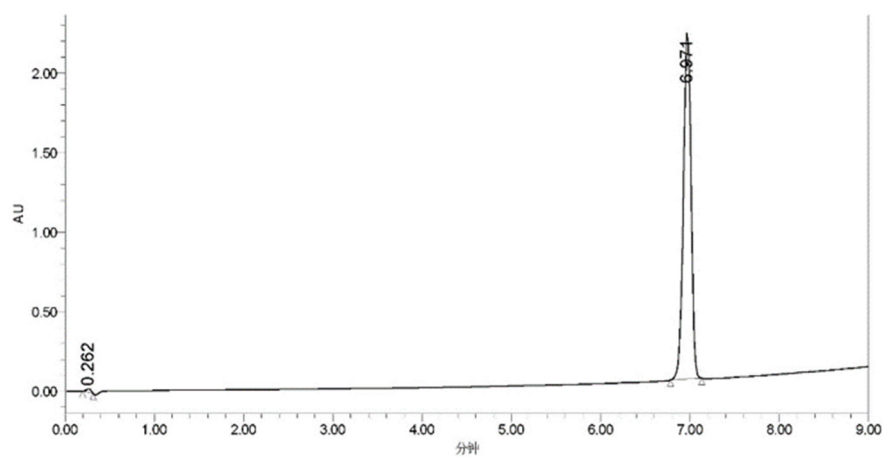

|     | Retention Time (Min) | Area     | Peak Height | %Area |
|-----|----------------------|----------|-------------|-------|
| 1   | 0.262                | 83118    | 20965       | 0.63  |
| 2   | 6.971                | 13097811 | 2170721     | 99.37 |
| Sum |                      |          |             | 100.0 |

**12 @230 nm**

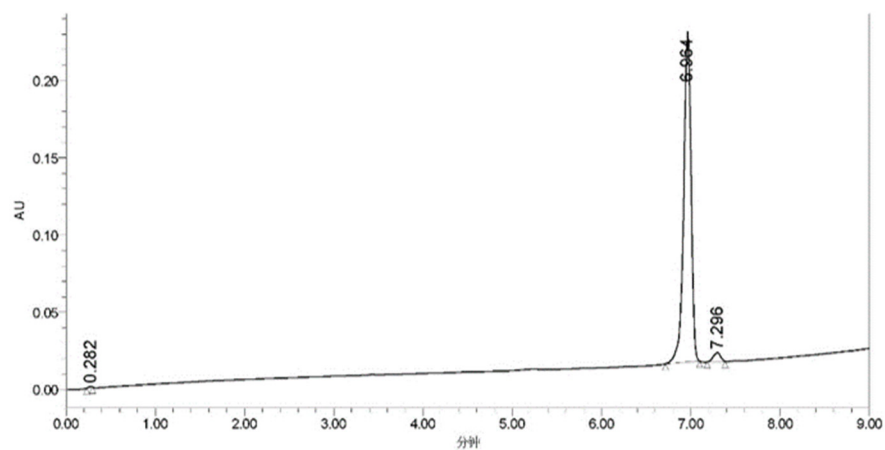

|     | Retention Time (Min) | Area    | Peak Height | %Area |
|-----|----------------------|---------|-------------|-------|
| 1   | 0.282                | 1247    | 416         | 0.10  |
| 2   | 6.964                | 1230635 | 212221      | 97.30 |
| 3   | 7.296                | 32913   | 5884        | 2.60  |
| Sum |                      |         |             | 100.0 |

**12 @254 nm**

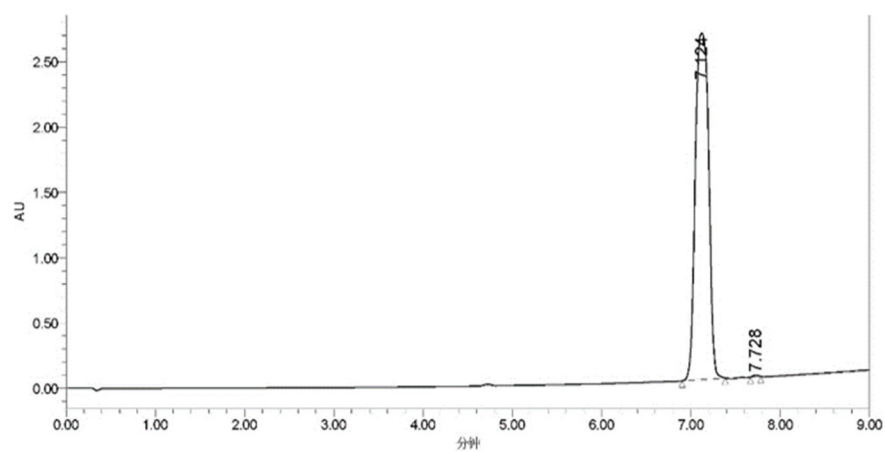

|     | Retention Time (Min) | Area     | Peak Height | %Area |
|-----|----------------------|----------|-------------|-------|
| 1   | 7.124                | 27421363 | 2663961     | 99.82 |
| 2   | 7.728                | 48483    | 12010       | 0.18  |
| Sum |                      |          |             | 100.0 |

**13 @230 nm**

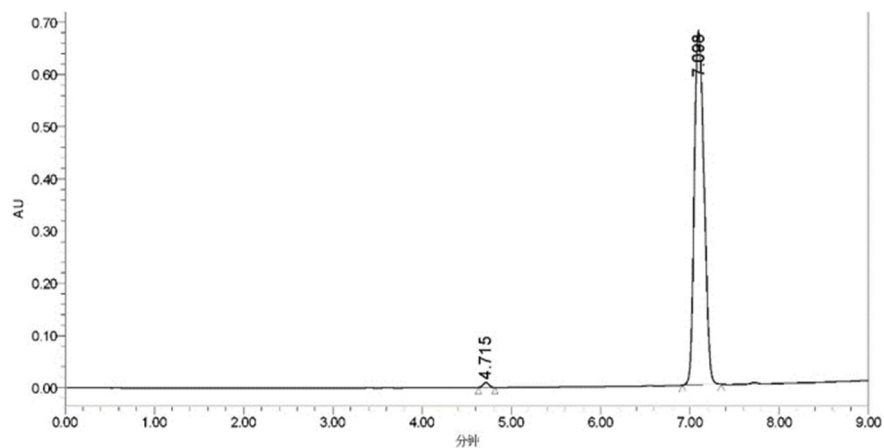

|     | Retention Time (Min) | Area    | Peak Height | %Area |
|-----|----------------------|---------|-------------|-------|
| 1   | 4.715                | 39589   | 8995        | 0.77  |
| 2   | 7.098                | 5104291 | 680579      | 99.23 |
| Sum |                      |         |             | 100.0 |

### 13 @254 nm

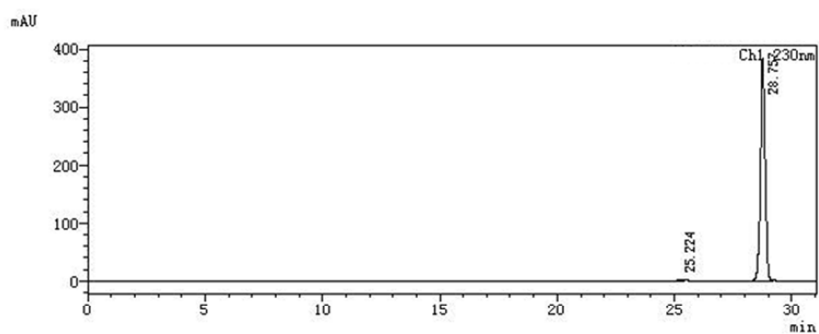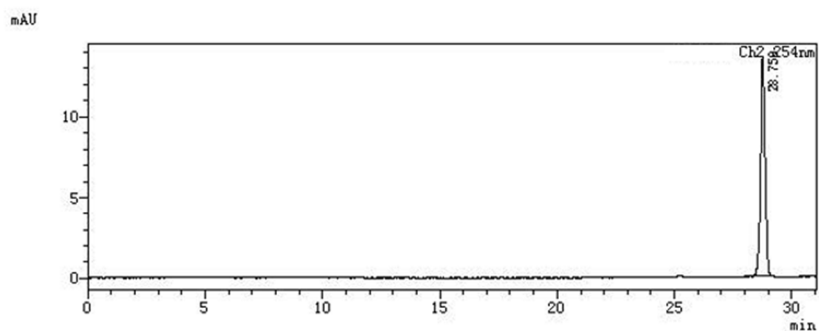

|     | Retention Time (Min) | Area    | Peak Height | %Area   |
|-----|----------------------|---------|-------------|---------|
| 1   | 25.224               | 21417   | 2177        | 0.407   |
| 2   | 28.757               | 5237841 | 384494      | 99.593  |
| sum |                      | 5259258 | 386671      | 100.000 |

  

|     | Retention Time (Min) | Area   | Peak Height | %Area   |
|-----|----------------------|--------|-------------|---------|
| 1   | 28.759               | 181650 | 13657       | 100.000 |
| sum |                      | 181650 | 13657       | 100.000 |

### 14 @ 230 nm & 254 nm
